# Supplementary material for: Sulfamide instead of urea in Biginelli reaction: from black box to reality
Source: Royal Society of Chemistry journal article supplement (doi:10.1039/d3qo01926h), 2024-01-01

## SUPPORTING INFORMATION

---

### **Sulfamide Instead Urea in Biginelli Reaction: From Black Box to Reality**

Alexander Yu. Lyapunov, Andriy V. Tarnovskiy, Sergey Yu. Boron, Eduard B. Rusanov, Galyna P. Grabchuk, Dmytro M. Volochnyuk,\* Serhiy V. Ryabukhin\*

## Table of Contents

|                                                                                                                             |     |
|-----------------------------------------------------------------------------------------------------------------------------|-----|
| General Information                                                                                                         | S2  |
| Synthetic procedures                                                                                                        | S2  |
| Analytical data                                                                                                             | S2  |
| Figure S1. NMR reaction profile for <b>7ca</b>                                                                              | S7  |
| Figure S2. Degradation of <b>7cc</b> , 2 weeks                                                                              | S7  |
| Figure S3. Degradation of <b>7cd</b> , 2 weeks                                                                              | S8  |
| Figure S4. Degradation of <b>7ce</b> , 2 weeks                                                                              | S8  |
| Figure S5. Temperature NMR for <b>9cb</b>                                                                                   | S9  |
| Figure S6. Temperature NMR for <b>10cb</b>                                                                                  | S9  |
| Figure S7. Thermal profile of the initial steps of the reaction and the <sup>1</sup> H NMR spectra of the reaction mixtures | S10 |
| NMR spectra                                                                                                                 | S11 |

## General Information

The solvents were purified according to the standard procedures. All starting materials were obtained from Enamine Ltd. Melting points were measured on automated melting point system. <sup>1</sup>H and <sup>13</sup>C, spectra were recorded on a Bruker Avance 500 spectrometer (at 500 MHz for Protons and 126 MHz for Carbon-13) and Varian Unity Plus 400 spectrometer (at 400 MHz for protons, 101 MHz for Carbon-13, and 376 MHz for Fluorine-19). Tetramethylsilane (<sup>1</sup>H, <sup>13</sup>C) was added as an internal standard. Preparative HPLC analyses were done on an Agilent 1200 instrument. Mass spectra were recorded on Agilent 1100 LCMSD SL instrument (chemical ionization (APCI)). High-resolution mass spectra (HRMS) were obtained on an Agilent 1260 Infinity UHPLC instrument coupled with an Agilent 6224 Accurate Mass TOF mass spectrometer.

All crystallographic measurements were performed on a Bruker Smart Apex II diffractometer operating in the  $\omega$  and  $\theta$  scans mode with graphite-monochromated Mo-K $\alpha$  radiation ( $\lambda = 0.71073 \text{ \AA}$ ). The data were corrected for Lorentz-polarization effects and for the effects of absorption (multi-scans method was applied for all compounds). The structures were solved by direct methods and refined by the full-matrix least-squares technique in the anisotropic approximation for non-hydrogen atoms using the Bruker SHELXTL program package.

Full crystallographic details have been deposited at Cambridge Crystallographic Data Centre (CCDC). Any request to the CCDC for these materials should quote the full literature citation and reference number CCDC 2252701-2252705, 2309237.

**Three-component condensation. General procedure.**

Corresponding acetoacetamide **2.1–2.5** (2 mmol), aldehyde **3.1–3.12** (2 mmol) and sulfamide **1.1–1.3** (2 mmol) were dissolved in DMF (2 ml). TMSCl (1.4 ml, 11 mmol) was added to the mixture under vigorous stirring in an Ar atmosphere and stirred for 24 h and 40 h for sulfamide **1.1** and **1.2**, **1.3**, correspondingly. The lower layer of the reaction mixture was separated with a syringe and further processed as indicated:

**Protocol B (acidic):** the solution was poured into 50 ml of stirring water, stirred for 30 minutes, the precipitate formed was filtered, washed and dried on the filter.

**Protocol C (urotropine):** the solution was added dropwise (2 drops/s) to a cooled to 5° solution of hexamethylenetetramine (3.75 g, 26.8 mmol) in water (15 ml) under vigorous stirring. The precipitate formed was filtered in 10–15 minutes, washed and dried on the filter.

**Protocol D (morpholine):** the solution was added dropwise (2 drops/s) to cooled to 5° solution of N-methylmorpholine (3.0 ml, 27.2 mmol) in of water (15 ml) under vigorous stirring. The precipitate formed was filtered in 10–15 minutes, washed and dried on the filter.

For purification, the crude products were dissolved in a minimum volume of acetone (3–5 ml), hexane was added dropwise with stirring until the precipitation formed. The product was filtered off, washed with an acetone–hexane mixture with the same ratio and dried.

**Two-component condensation.**

The synthesis was performed similarly to the three-component one starting from 2 mmol of **8a,d** and acetoacetamide **2.3** in 2 ml of DMF and 0.7 ml of TMSCl (5.5 mmol). Processing was performed according to protocol C or D.

## Analytical data

(3*R*\*,4*S*\*)-*N,N*-diethyl-5-methyl-3-phenyl-3,4-dihydro-2*H*-1,2,6-thiadiazine-4-carboxamide 1,1-dioxide (**7ca**).

White powder, mp = 204–206 °C. Yield = 64 % (416 mg). <sup>1</sup>H NMR (302 MHz, DMSO-*d*<sub>6</sub>)  $\delta$  7.66 (d, *J* = 11.3 Hz, 1H), 7.35 (s, 5H), 4.80 (t, *J* = 10.8 Hz, 1H), 3.89 (d, *J* = 10.4 Hz, 1H), 3.27 – 3.03 (m, 2H), 3.08 – 2.91 (m, 1H), 2.93 – 2.74 (m, 1H), 2.08 (s, 3H), 0.85 (t, *J* = 6.9 Hz, 3H), 0.54 (t, *J* = 7.0 Hz, 3H). <sup>13</sup>C{<sup>1</sup>H} NMR (76 MHz, Chloroform-*d*)  $\delta$  184.6, 171.7, 141.8, 133.8, 132.4, 63.8, 54.6, 47.1, 45.1, 30.7, 18.5, 17.3. LCMS, positive mode, *m/z*: 324 [M+H]<sup>+</sup>. HRMS (ESI–TOF) calcd. for C<sub>15</sub>H<sub>22</sub>N<sub>3</sub>O<sub>3</sub>S<sup>+</sup> [M+H]<sup>+</sup>: 324.1376, found 324.1374. Anal. calcd. for C<sub>15</sub>H<sub>21</sub>N<sub>3</sub>O<sub>3</sub>S: C, 55.71; H, 6.55; N, 12.99; S, 9.91. Found: C, 56.07; H, 6.82; N, 12.90; S, 9.77.

## SUPPORTING INFORMATION

### *(3R\*,4S\*)-5-methyl-N,3-diphenyl-3,4-dihydro-2H-1,2,6-thiadiazine-4-carboxamide 1,1-dioxide (7da)*

Thin white needles, mp = 186–190 °C. Yield = 21% (144 mg). <sup>1</sup>H NMR (400 MHz, DMSO-*d*<sub>6</sub>) δ 10.43 (s, 1H), 7.73 (d, *J* = 12.0 Hz, 1H), 7.42 (d, *J* = 7.4 Hz, 2H), 7.39 – 7.30 (m, 5H), 7.26 (t, *J* = 7.8 Hz, 2H), 7.06 (t, *J* = 7.4 Hz, 1H), 4.89 (t, *J* = 11.4 Hz, 1H), 3.85 (d, *J* = 10.9 Hz, 1H), 2.20 (s, 3H). <sup>13</sup>C{<sup>1</sup>H} NMR (76 MHz, DMSO-*d*<sub>6</sub>) δ 179.4, 166.0, 138.1, 137.1, 129.3, 129.1, 129.0, 127.9, 124.8, 120.1, 58.1, 53.8, 26.0. LCMS, positive mode, *m/z*: 344 [M+H]<sup>+</sup>. HRMS (ESI–TOF) calcd. for C<sub>17</sub>H<sub>18</sub>N<sub>3</sub>O<sub>3</sub>S<sup>+</sup> [M+H]<sup>+</sup>: 344.1063, found 344.1062. Anal. calcd. for C<sub>17</sub>H<sub>17</sub>N<sub>3</sub>O<sub>3</sub>S: C, 59.46; H, 4.99; N, 12.24; S, 9.34. Found: C, 59.81; H, 5.29; N, 12.58; S, 9.12.

### *(3R\*,4S\*)-N,5-dimethyl-N,3-diphenyl-3,4-dihydro-2H-1,2,6-thiadiazine-4-carboxamide 1,1-dioxide (7ea)*

Light-gray powder, mp = 200–205 °C. Yield = 50% (357 mg). <sup>1</sup>H NMR (302 MHz, DMSO-*d*<sub>6</sub>) δ 7.52 – 7.35 (m, 5H), 7.37 – 7.26 (m, 2H), 7.28 – 7.08 (m, 4H), 4.79 (d, *J* = 10.4 Hz, 1H), 3.40 (d, *J* = 10.5 Hz, 1H), 3.04 (s, 3H), 2.18 (s, 3H). <sup>13</sup>C{<sup>1</sup>H} NMR (76 MHz, DMSO-*d*<sub>6</sub>) δ 179.1, 167.5, 142.4, 136.9, 130.2, 129.3, 129.2, 128.8, 127.7, 127.5, 58.8, 50.5, 37.8, 26.7. LCMS, positive mode, *m/z*: 358 [M+H]<sup>+</sup>. HRMS (ESI–TOF) calcd. for C<sub>18</sub>H<sub>20</sub>N<sub>3</sub>O<sub>3</sub>S<sup>+</sup> [M+H]<sup>+</sup>: 358.1220, found 358.1220. Anal. calcd. for C<sub>18</sub>H<sub>19</sub>N<sub>3</sub>O<sub>3</sub>S: C, 60.49; H, 5.36; N, 11.76; S, 8.97. Found: C, 60.54; H, 5.43; N, 11.67; S, 8.67.

### *(3R\*,4S\*)-3-(4-methoxyphenyl)-N,N,5-trimethyl-3,4-dihydro-2H-1,2,6-thiadiazine-4-carboxamide 1,1-dioxide (7bb)*

White powder, mp = 165–168 °C. Yield = 14% (91 mg). <sup>1</sup>H NMR (500 MHz, DMSO-*d*<sub>6</sub>) δ 7.58 (d, *J* = 11.3 Hz, 1H), 7.27 (d, *J* = 8.6 Hz, 2H), 6.92 (d, *J* = 8.6 Hz, 2H), 4.64 (t, *J* = 10.8 Hz, 1H), 4.02 (d, *J* = 10.5 Hz, 1H), 3.74 (s, 3H), 2.69 (s, 3H), 2.55 (s, 3H), 2.08 (s, 3H). <sup>13</sup>C{<sup>1</sup>H} NMR (76 MHz, DMSO-*d*<sub>6</sub>) δ 180.2, 168.1, 159.7, 129.0, 128.9, 114.4, 58.5, 55.6, 49.6, 37.7, 35.7, 26.0. LCMS, positive mode, *m/z*: 326 [M+H]<sup>+</sup>. HRMS (ESI–TOF) calcd. for C<sub>14</sub>H<sub>20</sub>N<sub>3</sub>O<sub>4</sub>S<sup>+</sup> [M+H]<sup>+</sup>: 326.1169, found 326.1167. Anal. calcd. for C<sub>14</sub>H<sub>19</sub>N<sub>3</sub>O<sub>4</sub>S: C, 51.68; H, 5.89; N, 12.91; S, 9.85. Found: C, 51.42; H, 5.99; N, 13.02; S, 9.95.

### *(3R\*,4S\*)-N,N-diethyl-3-(4-methoxyphenyl)-5-methyl-3,4-dihydro-2H-1,2,6-thiadiazine-4-carboxamide 1,1-dioxide (7cb)*

Colorless crystalline powder, mp = 180–184 °C. Yield = 45% (317 mg). <sup>1</sup>H NMR (302 MHz, DMSO-*d*<sub>6</sub>) δ 7.56 (s, 1H), 7.26 (d, *J* = 8.3 Hz, 2H), 6.90 (d, *J* = 8.2 Hz, 2H), 4.72 (d, *J* = 10.2 Hz, 1H), 3.87 (d, *J* = 10.4 Hz, 1H), 3.71 (s, 3H), 3.31 – 3.06 (m, 2H), 3.08 – 2.77 (m, 2H), 2.07 (s, 3H), 0.86 (t, *J* = 7.0 Hz, 3H), 0.61 (t, *J* = 7.0 Hz, 3H). <sup>13</sup>C{<sup>1</sup>H} NMR (76 MHz, DMSO-*d*<sub>6</sub>) δ 184.7, 171.9, 164.5, 134.0, 133.8, 119.1, 63.2, 60.3, 54.7, 47.0, 45.1, 30.7, 18.6, 17.3. LCMS, positive mode, *m/z*: 354 [M+H]<sup>+</sup>. HRMS (ESI–TOF) calcd. for C<sub>16</sub>H<sub>24</sub>N<sub>3</sub>O<sub>4</sub>S<sup>+</sup> [M+H]<sup>+</sup>: 354.1482, found 354.1479. Anal. calcd. for C<sub>16</sub>H<sub>23</sub>N<sub>3</sub>O<sub>4</sub>S: C, 54.37; H, 6.56; N, 11.89; S, 9.07. Found: C, 54.26; H, 6.82; N, 11.68; S, 8.80.

### *(3R\*,4S\*)-3-(4-methoxyphenyl)-5-methyl-N-phenyl-3,4-dihydro-2H-1,2,6-thiadiazine-4-carboxamide 1,1-dioxide (7db)*

White powder, mp = 186–190 °C. Yield = 44% (328 mg). <sup>1</sup>H NMR (302 MHz, DMSO-*d*<sub>6</sub>) δ 10.43 (s, 1H), 7.62 (d, *J* = 11.9 Hz, 1H), 7.36 (dd, *J* = 11.9, 8.2 Hz, 4H), 7.25 (t, *J* = 7.8 Hz, 2H), 7.04 (t, *J* = 7.4 Hz, 1H), 6.88 (d, *J* = 8.3 Hz, 2H), 4.83 (t, *J* = 11.4 Hz, 1H), 3.83 (d, *J* = 10.9 Hz, 1H), 3.68 (s, 3H), 2.19 (s, 3H). <sup>13</sup>C{<sup>1</sup>H} NMR (76 MHz, DMSO-*d*<sub>6</sub>) δ 179.4, 166.2, 159.6, 138.2, 129.3, 129.2, 124.8, 120.1, 114.4, 57.5, 55.5, 53.9, 26.0. LCMS, positive mode, *m/z*: 374 [M+H]<sup>+</sup>. HRMS (ESI–TOF) calcd. for C<sub>18</sub>H<sub>19</sub>N<sub>3</sub>O<sub>4</sub>S<sup>+</sup> [M+H]<sup>+</sup>: 374.1169, found 374.1167. Anal. calcd. for C<sub>18</sub>H<sub>19</sub>N<sub>3</sub>O<sub>4</sub>S: C, 57.90; H, 5.13; N, 11.25; S, 8.59. Found: C, 57.61; H, 5.07; N, 11.03; S, 8.91.

### *(3R\*,4S\*)-3-(4-methoxyphenyl)-N,5-dimethyl-N-phenyl-3,4-dihydro-2H-1,2,6-thiadiazine-4-carboxamide 1,1-dioxide (7eb)*

White powder, mp = 173–175 °C. Yield = 50% (386 mg). <sup>1</sup>H NMR (500 MHz, DMSO-*d*<sub>6</sub>) δ 7.40 – 7.25 (m, 5H), 7.09 (d, *J* = 8.3 Hz, 2H), 6.96 (d, *J* = 8.5 Hz, 2H), 4.72 (t, *J* = 10.9 Hz, 1H), 3.81 (s, 3H), 3.39 (d, *J* = 10.4 Hz, 1H), 3.06 (s, 3H), 2.17 (s, 3H). <sup>13</sup>C{<sup>1</sup>H} NMR (76 MHz, DMSO-*d*<sub>6</sub>) δ 183.8, 172.3, 164.7, 147.2, 134.9, 133.8, 133.5, 132.3, 119.2, 63.0, 60.5, 55.4, 42.5, 31.4. LCMS, negative mode, *m/z*: 386 [M]<sup>-</sup>. HRMS (ESI–TOF) calcd. for C<sub>19</sub>H<sub>22</sub>N<sub>3</sub>O<sub>4</sub>S<sup>+</sup> [M+H]<sup>+</sup>: 388.1326, found 388.1317. Anal. calcd. for C<sub>19</sub>H<sub>21</sub>N<sub>3</sub>O<sub>4</sub>S: C, 58.90; H, 5.46; N, 10.85; S, 8.27. Found: C, 59.25; H, 5.80; N, 11.00; S, 8.59.

### *(3R\*,4S\*)-3-(3,4-dimethoxyphenyl)-N,N,5-trimethyl-3,4-dihydro-2H-1,2,6-thiadiazine-4-carboxamide 1,1-dioxide (7bc)*

Colorless crystals, mp = 192–194 °C. Yield = 48% (340 mg). <sup>1</sup>H NMR (400 MHz, DMSO-*d*<sub>6</sub>) δ 7.59 (d, *J* = 10.9 Hz, 1H), 7.06 (s, 1H), 6.92 (d, *J* = 8.2 Hz, 1H), 6.81 (dd, *J* = 8.2, 2.0 Hz, 1H), 4.64 (t, *J* = 10.7 Hz, 1H), 4.06 (d, *J* = 10.5 Hz, 1H), 3.75 (s, 6H), 2.72 (s, 3H), 2.57 (s, 3H), 2.09 (s, 3H). <sup>13</sup>C{<sup>1</sup>H} NMR (76 MHz, DMSO-*d*<sub>6</sub>) δ 180.8, 168.8, 149.8, 149.8, 129.9, 120.6, 112.4, 111.6, 59.4, 56.6, 56.5, 50.2, 38.4, 36.3, 26.6. LCMS, negative mode, *m/z*: 354 [M-H]<sup>-</sup>. HRMS (ESI–TOF) calcd. for C<sub>15</sub>H<sub>22</sub>N<sub>3</sub>O<sub>5</sub>S<sup>+</sup> [M+H]<sup>+</sup>: 356.1275, found 356.1281. Anal. calcd. for C<sub>15</sub>H<sub>21</sub>N<sub>3</sub>O<sub>5</sub>S: C, 50.69; H, 5.96; N, 11.82; S, 9.02. Found: C, 50.68; H, 5.77; N, 11.89; S, 8.88.

### *(3R\*,4S\*)-3-(3,4-dimethoxyphenyl)-N,N-diethyl-5-methyl-3,4-dihydro-2H-1,2,6-thiadiazine-4-carboxamide 1,1-dioxide (7cc)*

White powder, mp = 173–176 °C. Yield = 49% (375 mg). <sup>1</sup>H NMR (302 MHz, DMSO-*d*<sub>6</sub>) δ 7.56 (d, *J* = 10.6 Hz, 1H), 7.04 (s, 1H), 6.96 – 6.73 (m, 2H), 4.71 (t, *J* = 10.5 Hz, 1H), 3.90 (d, *J* = 10.4 Hz, 1H), 3.71 (d, *J* = 3.7 Hz, 6H), 3.23 – 3.08 (m, 2H), 3.11 – 2.80 (m, 2H), 2.07 (s, 3H), 0.86 (t, *J* = 7.0 Hz, 3H), 0.59 (t, *J* = 7.0 Hz, 3H). <sup>13</sup>C{<sup>1</sup>H} NMR (76 MHz, DMSO-*d*<sub>6</sub>) δ 180.5, 167.8, 149.9, 130.1, 120.9, 112.5, 111.8, 59.4, 56.6, 50.5, 43.0, 41.1, 26.6, 14.5, 13.2. LCMS, negative mode, *m/z*: 382 [M-H]<sup>-</sup>. HRMS (ESI–TOF) calcd. for C<sub>17</sub>H<sub>26</sub>N<sub>3</sub>O<sub>5</sub>S<sup>+</sup> [M+H]<sup>+</sup>: 384.1588, found 384.1586. Anal. calcd. for C<sub>17</sub>H<sub>25</sub>N<sub>3</sub>O<sub>5</sub>S: C, 53.25; H, 6.57; N, 10.96; S, 8.36. Found: C, 53.50; H, 6.69; N, 11.09; S, 8.40.

### *(3R\*,4S\*)-3-(4-bromophenyl)-N,N,5-trimethyl-3,4-dihydro-2H-1,2,6-thiadiazine-4-carboxamide 1,1-dioxide (7bd)*

White powder, mp = 183–187 °C. Yield = 12% (90 mg). <sup>1</sup>H NMR (302 MHz, DMSO-*d*<sub>6</sub>) δ 7.74 (d, *J* = 10.4 Hz, 1H), 7.59 (d, *J* = 8.0 Hz, 2H), 7.31 (d, *J* = 8.1 Hz, 2H), 4.72 (t, *J* = 10.6 Hz, 1H), 4.05 (d, *J* = 10.5 Hz, 1H), 2.70 (s, 3H), 2.57 (s, 3H), 2.09 (s, 3H). <sup>13</sup>C{<sup>1</sup>H} NMR (76 MHz, DMSO-*d*<sub>6</sub>) δ 180.6, 168.4, 136.8, 132.7, 130.4, 123.0, 59.1, 49.8, 38.4, 36.3, 26.6. LCMS, negative mode, *m/z*: 374 [M]<sup>-</sup>. HRMS (ESI–TOF) calcd. for C<sub>13</sub>H<sub>17</sub>BrN<sub>3</sub>O<sub>3</sub>S<sup>+</sup> [M+H]<sup>+</sup>: 374.0169, found 374.0169. Anal. calcd. for C<sub>13</sub>H<sub>16</sub>BrN<sub>3</sub>O<sub>3</sub>S: C, 41.72; H, 4.31; N, 11.23; S, 8.57; Br, 21.35. Found: C, 41.71; H, 4.50; N, 11.17; S, 8.29; Br, 21.01.

### *(3R\*,4S\*)-3-(4-bromophenyl)-N,N-diethyl-5-methyl-3,4-dihydro-2H-1,2,6-thiadiazine-4-carboxamide 1,1-dioxide (7cd)*

## SUPPORTING INFORMATION

White powder, mp = 193–196 °C. Yield = 29% (239 mg).  $^1\text{H}$  NMR (302 MHz, DMSO- $d_6$ )  $\delta$  7.72 (d,  $J$  = 11.2 Hz, 1H), 7.58 (d,  $J$  = 8.5 Hz, 2H), 7.31 (d,  $J$  = 8.5 Hz, 2H), 4.79 (t,  $J$  = 10.8 Hz, 1H), 3.89 (d,  $J$  = 10.4 Hz, 1H), 3.23 – 3.09 (m, 2H), 3.13 – 2.99 (m, 1H), 2.88 (dq,  $J$  = 14.3, 7.0 Hz, 1H), 2.08 (s, 3H), 0.86 (t,  $J$  = 7.0 Hz, 3H), 0.58 (t,  $J$  = 7.0 Hz, 3H).  $^{13}\text{C}\{^1\text{H}\}$  NMR (76 MHz, Chloroform- $d$ )  $\delta$  184.5, 171.6, 141.1, 136.8, 134.7, 127.0, 63.2, 54.3, 47.1, 45.2, 30.7, 18.6, 17.3. LCMS, positive mode,  $m/z$ : 402 [M] $^+$ . HRMS (ESI–TOF) calcd. for  $\text{C}_{15}\text{H}_{21}\text{BrN}_3\text{O}_3\text{S}^+$  [M+H] $^+$ : 402.0482, found 402.0474. Anal. calcd. for  $\text{C}_{15}\text{H}_{20}\text{BrN}_3\text{O}_3\text{S}$ : C, 44.78; H, 5.01; N, 10.44; S, 7.97; Br, 19.86. Found: C, 44.98; H, 4.82; N, 10.27; S, 8.08; Br, 19.74.

*(3R\*,4S\*)-3-(4-bromophenyl)-N,5-dimethyl-N-phenyl-3,4-dihydro-2H-1,2,6-thiadiazine-4-carboxamide 1,1-dioxide (7ed)*

White powder, mp = 178–180 °C. Yield = 35% (305 mg).  $^1\text{H}$  NMR (302 MHz, DMSO- $d_6$ )  $\delta$  7.62 (d,  $J$  = 8.0 Hz, 2H), 7.52 – 7.19 (m, 5H), 7.12 (d,  $J$  = 8.1 Hz, 2H), 6.38 (br, 1H), 4.76 (t,  $J$  = 10.6 Hz, 1H), 3.44 (d,  $J$  = 10.5 Hz, 1H), 3.07 (s, 3H), 2.19 (s, 3H).  $^{13}\text{C}\{^1\text{H}\}$  NMR (76 MHz, DMSO- $d_6$ )  $\delta$  179.0, 167.4, 142.4, 136.2, 132.2, 130.2, 129.9, 128.8, 127.4, 122.5, 58.3, 50.2, 37.8, 26.8. LCMS, negative mode,  $m/z$ : 434 [M-H] $^-$ . HRMS (ESI–TOF) calcd. for  $\text{C}_{18}\text{H}_{19}\text{BrN}_3\text{O}_3\text{S}^+$  [M+H] $^+$ : 436.0325, found 436.0326. Anal. calcd. for  $\text{C}_{18}\text{H}_{18}\text{BrN}_3\text{O}_3\text{S}$ : C, 49.55; H, 4.16; N, 9.63; S, 7.35; Br, 18.31. Found: C, 49.31; H, 4.15; N, 9.89; S, 7.59; Br, 18.42.

*(3R\*,4S\*)-N,N-diethyl-5-methyl-3-(4-nitrophenyl)-3,4-dihydro-2H-1,2,6-thiadiazine-4-carboxamide 1,1-dioxide (7ce)*

Yellowish powder. Crude.  $^1\text{H}$  NMR (400 MHz, DMSO- $d_6$ )  $\delta$  8.25 (d,  $J$  = 8.5 Hz, 2H), 7.91 (s, 1H), 7.65 (d,  $J$  = 8.4 Hz, 2H), 4.98 (d,  $J$  = 10.4 Hz, 1H), 3.97 (d,  $J$  = 10.4 Hz, 1H), 3.24 – 3.11 (m, 2H), 3.14 – 2.79 (m, 2H), 2.11 (s, 3H), 0.87 (t,  $J$  = 7.0 Hz, 3H), 0.57 (t,  $J$  = 7.0 Hz, 3H). LCMS, positive mode,  $m/z$ : 369 [M+H] $^+$ . HRMS (ESI–TOF) calcd. for  $\text{C}_{15}\text{H}_{21}\text{N}_4\text{O}_5\text{S}^+$  [M+H] $^+$ : 369.1227, found 369.1221.

*(3R\*,4S\*)-3-(2-bromophenyl)-N,N-diethyl-5-methyl-3,4-dihydro-2H-1,2,6-thiadiazine-4-carboxamide 1,1-dioxide (7cf)*

White powder, mp = 169–171 °C. Yield = 25% (201 mg).  $^1\text{H}$  NMR (400 MHz, DMSO- $d_6$ )  $\delta$  7.80 (d,  $J$  = 7.8 Hz, 1H), 7.63 (d,  $J$  = 8.1 Hz, 1H), 7.57 – 7.43 (m, 2H), 7.30 (t,  $J$  = 7.7 Hz, 1H), 5.45 (t,  $J$  = 8.9 Hz, 1H), 4.20 (dd,  $J$  = 10.9, 2.9 Hz, 1H), 3.29 – 3.17 (m, 1H), 3.05 (p,  $J$  = 7.3 Hz, 3H), 2.10 (t,  $J$  = 2.0 Hz, 3H), 0.82 (t,  $J$  = 7.0 Hz, 3H), 0.73 (t,  $J$  = 7.0 Hz, 3H).  $^{13}\text{C}\{^1\text{H}\}$  NMR (76 MHz, DMSO- $d_6$ )  $\delta$  180.0, 166.3, 136.5, 133.4, 131.2, 130.2, 128.8, 123.9, 57.3, 48.3, 42.4, 40.0, 26.1, 14.2, 12.5. LCMS, negative mode,  $m/z$ : 402 [M-H] $^-$ . HRMS (ESI–TOF) calcd. for  $\text{C}_{15}\text{H}_{21}\text{BrN}_3\text{O}_3\text{S}^+$  [M+H] $^+$ : 402.0482, found 402.0480. Anal. calcd. for  $\text{C}_{15}\text{H}_{20}\text{BrN}_3\text{O}_3\text{S}$ : C, 44.78; H, 5.01; N, 10.44; S, 7.97; Br, 19.86. Found: C, 44.77; H, 5.00; N, 10.19; S, 7.99; Br, 20.10.

*(3R\*,4S\*)-N,N-diethyl-5-methyl-3-(thiophen-3-yl)-3,4-dihydro-2H-1,2,6-thiadiazine-4-carboxamide 1,1-dioxide (7ci)*

Grey powder, mp = 196–199 °C. Yield = 39% (257 mg).  $^1\text{H}$  NMR (302 MHz, DMSO- $d_6$ )  $\delta$  7.65 (d,  $J$  = 11.6 Hz, 1H), 7.54 (dd,  $J$  = 5.1, 2.9 Hz, 1H), 7.45 (s, 1H), 7.14 (d,  $J$  = 5.0 Hz, 1H), 4.92 (t,  $J$  = 11.0 Hz, 1H), 3.83 (d,  $J$  = 10.3 Hz, 1H), 3.19 (q,  $J$  = 7.5 Hz, 2H), 3.15 – 3.03 (m, 1H), 2.91 (dq,  $J$  = 14.2, 6.7 Hz, 1H), 2.07 (s, 3H), 0.90 (t,  $J$  = 7.0 Hz, 3H), 0.63 (t,  $J$  = 7.0 Hz, 3H).  $^{13}\text{C}\{^1\text{H}\}$  NMR (76 MHz, DMSO- $d_6$ )  $\delta$  179.8, 167.2, 138.0, 127.7, 127.0, 124.4, 54.8, 49.6, 42.4, 26.1, 13.9, 12.7. LCMS, positive mode,  $m/z$ : 330 [M+H] $^+$ . HRMS (ESI–TOF) calcd. for  $\text{C}_{13}\text{H}_{20}\text{N}_3\text{O}_3\text{S}_2^+$  [M+H] $^+$ : 330.0941, found 330.0937. Anal. calcd. for  $\text{C}_{13}\text{H}_{19}\text{N}_3\text{O}_3\text{S}_2$ : C, 47.40; H, 5.81; N, 12.76; S, 19.46. Found: C, 47.71; H, 5.46; N, 13.00; S, 19.51.

*(3R\*,4S\*)-N,N-diethyl-5-methyl-3-(1-methyl-1H-pyrazol-4-yl)-3,4-dihydro-2H-1,2,6-thiadiazine-4-carboxamide 1,1-dioxide (7cj)*

White powder, mp = 161–165 °C. Yield = 35% (229 mg).  $^1\text{H}$  NMR (500 MHz, DMSO- $d_6$ )  $\delta$  7.60 (d,  $J$  = 3.3 Hz, 1H), 7.53 (dd,  $J$  = 11.6, 3.2 Hz, 1H), 7.38 (d,  $J$  = 3.3 Hz, 1H), 4.81 – 4.68 (m, 1H), 3.83 – 3.78 (m, 1H), 3.76 (d,  $J$  = 3.3 Hz, 3H), 3.27 – 3.15 (m, 3H), 3.12 – 2.96 (m, 1H), 2.06 (d,  $J$  = 3.3 Hz, 3H), 0.93 (td,  $J$  = 7.0, 3.3 Hz, 3H), 0.72 (td,  $J$  = 7.2, 3.2 Hz, 3H).  $^{13}\text{C}\{^1\text{H}\}$  NMR (76 MHz, DMSO- $d_6$ )  $\delta$  179.8, 167.3, 137.5, 129.7, 117.9, 51.0, 49.9, 42.6, 26.1, 14.0, 12.6. LCMS, positive mode,  $m/z$ : 328 [M+H] $^+$ . HRMS (ESI–TOF) calcd. for  $\text{C}_{13}\text{H}_{20}\text{N}_3\text{O}_3\text{S}_2^+$  [M+H] $^+$ : 330.0941, found 330.0937. Anal. calcd. for  $\text{C}_{13}\text{H}_{21}\text{N}_5\text{O}_3\text{S}$ : C, 47.69; H, 6.47; N, 21.39; S, 9.79. Found: C, 47.30; H, 6.62; N, 21.51; S, 10.05.

*(3R\*,4S\*)-N,N-diethyl-5-methyl-3-(5-methylfuran-2-yl)-3,4-dihydro-2H-1,2,6-thiadiazine-4-carboxamide 1,1-dioxide (7ck)*

White powder, mp = 169–171 °C. Yield = 36% (236 mg).  $^1\text{H}$  NMR (500 MHz, DMSO- $d_6$ )  $\delta$  7.65 (d,  $J$  = 7.9 Hz, 1H), 6.28 (d,  $J$  = 3.2 Hz, 1H), 6.04 (d,  $J$  = 3.1 Hz, 1H), 4.82 (t,  $J$  = 9.5 Hz, 1H), 4.00 (d,  $J$  = 10.4 Hz, 1H), 3.31 – 3.08 (m, 4H), 2.21 (s, 3H), 2.08 (s, 3H), 0.93 (t,  $J$  = 7.0 Hz, 3H), 0.87 (t,  $J$  = 7.1 Hz, 3H).  $^{13}\text{C}\{^1\text{H}\}$  NMR (76 MHz, DMSO- $d_6$ )  $\delta$  179.5, 166.8, 152.3, 148.1, 109.8, 107.2, 52.8, 47.3, 42.5, 26.1, 14.1, 13.7, 12.7. LCMS, negative mode,  $m/z$ : 326 [M-H] $^-$ . HRMS (ESI–TOF) calcd. for  $\text{C}_{14}\text{H}_{22}\text{N}_3\text{O}_4\text{S}^+$  [M+H] $^+$ : 328.1326, found 328.1324. Anal. calcd. for  $\text{C}_{14}\text{H}_{21}\text{N}_3\text{O}_4\text{S}$ : C, 51.36; H, 6.47; N, 12.83; S, 9.79. Found: C, 51.41; H, 6.14; N, 12.72; S, 9.61.

*(S\*)-2-((R\*)-(3,4-dimethoxyphenyl)(sulfamoylamino)methyl)-N,N-diethyl-3-oxobutanamide (8cc)*

White powder, mp = 125–129 °C. Yield = 43% (345 mg).  $^1\text{H}$  NMR (302 MHz, DMSO- $d_6$ )  $\delta$  7.29 (d,  $J$  = 10.9 Hz, 1H), 7.09 (d,  $J$  = 2.0 Hz, 1H), 6.97 – 6.69 (m, 2H), 6.41 (s, 2H), 4.93 (t,  $J$  = 11.0 Hz, 1H), 3.90 (d,  $J$  = 11.1 Hz, 1H), 3.69 (d,  $J$  = 9.5 Hz, 6H), 3.23 – 2.78 (m, 4H), 2.31 (s, 3H), 0.83 (t,  $J$  = 7.0 Hz, 3H), 0.66 (t,  $J$  = 7.0 Hz, 3H).  $^{13}\text{C}\{^1\text{H}\}$  NMR (76 MHz, DMSO- $d_6$ )  $\delta$  205.1, 165.7, 149.1, 148.8, 133.6, 121.2, 112.3, 111.9, 65.2, 58.7, 56.4, 56.4, 55.9, 42.5, 27.4, 15.2, 13.5. HRMS (ESI–TOF) calcd. for  $\text{C}_{17}\text{H}_{27}\text{N}_3\text{NaO}_6\text{S}^+$  [M+Na] $^+$ : 424.1513, found 424.1510. Anal. calcd. for  $\text{C}_{17}\text{H}_{27}\text{N}_3\text{O}_6\text{S}$ : C, 50.86; H, 6.78; N, 10.47; S, 7.99. Found: C, 50.92; H, 6.49; N, 10.07; S, 7.83.

*(S\*)-2-((R\*)-(4-bromophenyl)(sulfamoylamino)methyl)-3-oxo-N-phenylbutanamide (8dd)*

White powder, mp = 160–163 °C. Yield = 30% (253 mg).  $^1\text{H}$  NMR (302 MHz, DMSO- $d_6$ )  $\delta$  10.09 (s, 1H), 7.67 (d,  $J$  = 10.1 Hz, 1H), 7.50 – 7.29 (m, 6H), 7.19 (t,  $J$  = 7.8 Hz, 2H), 6.98 (t,  $J$  = 7.4 Hz, 1H), 6.51 (s, 2H), 5.00 (t,  $J$  = 10.8 Hz, 1H), 3.89 (d,  $J$  = 11.3 Hz, 1H), 2.36 (s, 3H).  $^{13}\text{C}\{^1\text{H}\}$  NMR (76 MHz, DMSO- $d_6$ )  $\delta$  202.7, 164.3, 140.4, 138.6, 131.1, 130.5, 129.0, 124.3, 120.8, 120.0, 68.4, 56.9, 28.3. LCMS, positive mode,  $m/z$ : 440 [M+H] $^+$ . HRMS (ESI–TOF) calcd. for  $\text{C}_{17}\text{H}_{18}\text{BrN}_3\text{NaO}_4\text{S}^+$  [M+Na] $^+$ : 462.0094, found 462.0092. Anal. calcd. for  $\text{C}_{17}\text{H}_{18}\text{BrN}_3\text{O}_4\text{S}$ : C, 46.37; H, 4.12; N, 9.54; S, 7.28; Br, 18.15. Found: C, 46.18; H, 3.96; N, 9.25; S, 7.63; Br, 17.91.

*(S\*)-2-((R\*)-(4-nitrophenyl)(sulfamoylamino)methyl)-3-oxo-N-phenylbutanamide (8de)*

## SUPPORTING INFORMATION

Yellowish powder, mp = 175–179 °C. Yield = 30% (245 mg). <sup>1</sup>H NMR (500 MHz, DMSO-*d*<sub>6</sub>) δ 10.12 (s, 1H), 8.11 (d, *J* = 8.2 Hz, 2H), 7.84 (d, *J* = 10.0 Hz, 1H), 7.68 (d, *J* = 8.4 Hz, 2H), 7.30 (d, *J* = 7.9 Hz, 2H), 7.18 (t, *J* = 7.8 Hz, 2H), 6.98 (t, *J* = 7.4 Hz, 1H), 6.59 (s, 2H), 5.13 (t, *J* = 10.6 Hz, 1H), 3.93 (d, *J* = 11.4 Hz, 1H), 2.36 (s, 3H). <sup>13</sup>C{<sup>1</sup>H} NMR (76 MHz, DMSO-*d*<sub>6</sub>) δ 202.7, 164.6, 149.4, 147.7, 139.1, 130.2, 129.6, 125.0, 124.0, 120.6, 68.4, 57.4, 29.0. LCMS, negative mode, *m/z*: 405 [M-H]<sup>-</sup>. HRMS (ESI-TOF) calcd. for C<sub>17</sub>H<sub>18</sub>N<sub>4</sub>NaO<sub>6</sub>S<sup>-</sup> [M+Na]<sup>-</sup>: 429.0839, found 429.0837. Anal. calcd. for C<sub>17</sub>H<sub>18</sub>N<sub>4</sub>O<sub>6</sub>S: C 50.24; H 4.46; N 13.79; S 7.89. Found: C 50.64; H 4.52; N 13.99; S 7.81.

### *Ethyl 3-(4-methoxyphenyl)-5,6-dimethyl-3,6-dihydro-2H-1,2,6-thiadiazine-4-carboxylate 1,1-dioxide (9ab)*

Light yellow oil. Yield = 9% (61 mg). <sup>1</sup>H NMR (302 MHz, DMSO-*d*<sub>6</sub>) δ 7.96 (d, *J* = 7.8 Hz, 1H), 7.18 (d, *J* = 8.3 Hz, 2H), 6.83 (d, *J* = 8.2 Hz, 2H), 5.28 (d, *J* = 7.6 Hz, 1H), 3.79 (q, *J* = 7.1 Hz, 2H), 3.69 (s, 3H), 3.11 (s, 3H), 2.29 (s, 3H), 0.80 (t, *J* = 7.0 Hz, 3H). <sup>13</sup>C{<sup>1</sup>H} NMR (76 MHz, DMSO-*d*<sub>6</sub>) δ 166.6, 159.2, 148.4, 131.2, 129.8, 113.7, 108.0, 60.0, 58.4, 55.5, 32.0, 17.6, 14.0. LCMS, positive mode, *m/z*: 341 [M+H]<sup>+</sup>. HRMS (ESI-TOF) calcd. for C<sub>15</sub>H<sub>21</sub>N<sub>2</sub>O<sub>5</sub>S<sup>+</sup> [M+H]<sup>+</sup>: 341.1166, found 341.1164. Anal. calcd. for C<sub>15</sub>H<sub>20</sub>N<sub>2</sub>O<sub>5</sub>S: C, 52.93; H, 5.92; N, 8.23; S, 9.42. Found: C, 53.31; H, 5.91; N, 8.61; S, 9.18.

### *N,N-diethyl-3-(4-methoxyphenyl)-5,6-dimethyl-3,6-dihydro-2H-1,2,6-thiadiazine-4-carboxamide 1,1-dioxide (9cb)*

White powder, mp = 155–157 °C. Yield = 51% (375 mg). <sup>1</sup>H NMR (302 MHz, DMSO-*d*<sub>6</sub>) δ 7.69 (dd, *J* = 51.5, 7.2 Hz, 1H), 7.28 (d, *J* = 8.3 Hz, 2H), 6.83 (dd, *J* = 11.6, 8.2 Hz, 2H), 5.31 – 4.73 (m, 1H), 3.70 (s, 3H), 3.29 – 3.06 (m, 2H), 3.02 (s, 3H), 2.98 – 2.73 (m, 2H), 1.90 – 1.67 (m, 3H), 1.08 (t, *J* = 7.0 Hz, 1H), 0.72 (t, *J* = 6.9 Hz, 2H), 0.65 (t, *J* = 6.2 Hz, 3H). <sup>13</sup>C{<sup>1</sup>H} NMR (76 MHz, DMSO-*d*<sub>6</sub>) δ 166.6, 165.9\*, 159.1, 136.3\*, 134.0, 130.3\*, 129.4, 128.8\*, 128.3, 118.8\*, 117.9, 113.5, 113.1\*, 60.2\*, 60.0, 55.2, 55.1\*, 41.4\*, 41.2, 37.5\*, 36.6, 34.2, 17.7, 14.4\*, 12.8, 12.1\*, 11.7 (\* - due to hindered rotation). LCMS, positive mode, *m/z*: 368 [M+H]<sup>+</sup>. HRMS (ESI-TOF) calcd. for C<sub>17</sub>H<sub>26</sub>N<sub>3</sub>O<sub>4</sub>S<sup>+</sup> [M+H]<sup>+</sup>: 368.1639, found 368.1635. Anal. calcd. for C<sub>17</sub>H<sub>25</sub>N<sub>3</sub>O<sub>4</sub>S: C, 55.57; H, 6.86; N, 11.44; S, 8.72. Found: C, 55.39; H, 6.88; N, 11.08; S, 8.41.

### *3-(4-methoxyphenyl)-5,6-dimethyl-N-phenyl-3,6-dihydro-2H-1,2,6-thiadiazine-4-carboxamide 1,1-dioxide (9db)*

White powder. Yield = 15% (116 mg). <sup>1</sup>H NMR (302 MHz, DMSO-*d*<sub>6</sub>) δ 9.86 (s, 1H), 7.72 (d, *J* = 7.4 Hz, 1H), 7.36 (dd, *J* = 13.8, 8.2 Hz, 4H), 7.18 (t, *J* = 7.8 Hz, 2H), 6.95 (t, *J* = 7.4 Hz, 1H), 6.78 (d, *J* = 8.3 Hz, 2H), 5.38 (d, *J* = 7.0 Hz, 1H), 3.65 (s, 3H), 3.06 (s, 3H), 2.06 (s, 3H). <sup>13</sup>C{<sup>1</sup>H} NMR (76 MHz, DMSO-*d*<sub>6</sub>) δ 166.1, 159.3, 139.8, 139.1, 130.5, 130.2, 128.9, 123.9, 120.1, 117.0, 113.6, 59.4, 55.4, 33.4, 18.5. LCMS, negative mode, *m/z*: 386 [M-H]<sup>-</sup>. HRMS (ESI-TOF) calcd. for C<sub>19</sub>H<sub>22</sub>N<sub>3</sub>O<sub>4</sub>S<sup>-</sup> [M+H]<sup>-</sup>: 388.1326, found 388.1321. Anal. calcd. for C<sub>19</sub>H<sub>21</sub>N<sub>3</sub>O<sub>4</sub>S: C, 58.90; H, 5.46; N, 10.85; S, 8.27. Found: C, 59.23; H, 5.76; N, 10.79; S, 8.49.

### *5,6-dimethyl-3-(4-nitrophenyl)-N-phenyl-3,6-dihydro-2H-1,2,6-thiadiazine-4-carboxamide 1,1-dioxide (9de)*

White powder, mp = 169–172 °C. Yield = 35% (283 mg). <sup>1</sup>H NMR (400 MHz, DMSO-*d*<sub>6</sub>) δ 10.07 (s, 1H), 8.22 (d, *J* = 4.2 Hz, 1H), 8.14 (d, *J* = 8.5 Hz, 2H), 7.74 (d, *J* = 8.5 Hz, 2H), 7.43 (d, *J* = 8.0 Hz, 2H), 7.22 (t, *J* = 7.8 Hz, 2H), 7.00 (t, *J* = 7.4 Hz, 1H), 5.65 (s, 1H), 3.13 (s, 3H), 2.17 (s, 3H). <sup>13</sup>C{<sup>1</sup>H} NMR (76 MHz, DMSO-*d*<sub>6</sub>) δ 165.5, 147.0, 145.8, 141.1, 138.5, 130.0, 128.6, 123.6, 123.0, 119.6, 113.6, 58.0, 32.5, 18.1. LCMS, positive mode, *m/z*: 403 [M+H]<sup>+</sup>. HRMS (ESI-TOF) calcd. for C<sub>18</sub>H<sub>19</sub>N<sub>4</sub>O<sub>5</sub>S<sup>+</sup> [M+H]<sup>+</sup>: 403.1071, found 403.1066. Anal. calcd. for C<sub>18</sub>H<sub>18</sub>N<sub>4</sub>O<sub>5</sub>S: C, 53.72; H, 4.51; N, 13.92; S, 7.97. Found: C, 53.32; H, 4.37; N, 13.97; S, 7.93.

### *N,N-diethyl-3-(4-methoxyphenyl)-5-methyl-6-phenyl-3,6-dihydro-2H-1,2,6-thiadiazine-4-carboxamide 1,1-dioxide (10cb)*

White powder, mp = 187–190 °C. Yield = 56% (481 mg). <sup>1</sup>H NMR (400 MHz, DMSO-*d*<sub>6</sub>) δ 8.03 (dd, *J* = 55.2, 7.1 Hz, 1H), 7.51 (t, *J* = 7.2 Hz, 2H), 7.46 – 7.32 (m, 5H), 6.89 (dd, *J* = 15.1, 8.3 Hz, 2H), 5.21 (dd, *J* = 74.5, 7.0 Hz, 1H), 3.74 (d, *J* = 4.0 Hz, 3H), 3.54 – 3.34 (m, 1H), 3.29 – 2.84 (m, 3H), 1.62 – 1.42 (m, 3H), 1.14 (t, *J* = 6.9 Hz, 1H), 0.76 (t, *J* = 7.0 Hz, 1H), 0.69 (q, *J* = 6.8 Hz, 4H). LCMS, positive mode, *m/z*: 430 [M+H]<sup>+</sup>. HRMS (ESI-TOF) calcd. for C<sub>22</sub>H<sub>28</sub>N<sub>3</sub>O<sub>4</sub>S<sup>+</sup> [M+H]<sup>+</sup>: 430.1795, found 430.1792. Anal. calcd. for C<sub>22</sub>H<sub>27</sub>N<sub>3</sub>O<sub>4</sub>S: C, 61.52; H, 6.34; N, 9.78; S, 7.46. Found: C, 61.85; H, 6.07; N, 9.89; S, 7.09.

### *(S\*)-2-((R\*)-(4-bromophenyl)((N-methylsulfamoyl)amino)methyl)-3-oxo-N-phenylbutanamide (11dd)*

White powder, mp = 146–151 °C. Yield = 18% (164 mg). <sup>1</sup>H NMR (400 MHz, DMSO-*d*<sub>6</sub>) δ 10.10 (s, 1H), 7.87 (d, *J* = 10.0 Hz, 1H), 7.45 (d, *J* = 8.5 Hz, 2H), 7.38 (d, *J* = 8.0 Hz, 2H), 7.31 (d, *J* = 8.0 Hz, 2H), 7.20 (t, *J* = 7.8 Hz, 2H), 6.99 (t, *J* = 7.4 Hz, 1H), 6.67 (q, *J* = 5.0 Hz, 1H), 4.86 (t, *J* = 10.5 Hz, 1H), 3.97 (d, *J* = 11.0 Hz, 1H), 2.34 (s, 3H), 2.05 (d, *J* = 5.0 Hz, 3H). <sup>13</sup>C NMR (76 MHz, DMSO-*d*<sub>6</sub>) δ 201.8, 163.6, 139.8, 138.1, 130.6, 130.0, 128.6, 123.8, 120.5, 119.5, 67.4, 56.3, 28.4, 27.7. LCMS, negative mode, *m/z*: 452 [M-H]<sup>-</sup>. HRMS (ESI-TOF) calcd. for C<sub>18</sub>H<sub>21</sub>BrN<sub>3</sub>O<sub>4</sub>S<sup>-</sup> [M+H]<sup>-</sup>: 454.0431, found 454.0425. Anal. calcd. for C<sub>18</sub>H<sub>20</sub>BrN<sub>3</sub>O<sub>4</sub>S: C, 47.58; H, 4.44; N, 9.28; S, 7.06; Br, 17.59. Found: C, 47.98; H, 4.54; N, 9.18; S, 7.12; Br, 17.95.

### *N-(4-methoxybenzylidene)sulfamide (12b)*

White powder, mp = 169–171 °C. Yield = 41% (0.88 g). <sup>1</sup>H NMR (400 MHz, DMSO-*d*<sub>6</sub>) δ 8.81 (s, 1H), 7.93 (d, *J* = 8.7 Hz, 2H), 7.24 (s, 2H), 7.11 (d, *J* = 8.7 Hz, 2H), 3.85 (s, 3H). <sup>13</sup>C{<sup>1</sup>H} NMR (126 MHz, DMSO-*d*<sub>6</sub>) δ 165.86, 164.09, 132.64, 125.13, 114.85, 55.68. LCMS, positive mode, *m/z*: 215 [M+H]<sup>+</sup>. HRMS (ESI-TOF) calcd. for C<sub>8</sub>H<sub>11</sub>N<sub>2</sub>O<sub>3</sub>S<sup>+</sup> [M+H]<sup>+</sup>: 215.0485, found 215.0483. Anal. calcd. for C<sub>8</sub>H<sub>10</sub>N<sub>2</sub>O<sub>3</sub>S: C 44.85; H 4.70; N 13.08; S 14.97. Found: C 44.32; H 4.37; N 13.17; S 14.93.

### *N-(4-bromobenzylidene)sulfamide (12d)*

White powder, mp = 241–243 °C. Yield = 9% (0.238 g). <sup>1</sup>H NMR (400 MHz, DMSO-*d*<sub>6</sub>) δ 8.91 (s, 1H), 7.92 (d, *J* = 8.2 Hz, 2H), 7.79 (d, *J* = 8.2 Hz, 2H), 7.37 (br. s, 2H). <sup>13</sup>C{<sup>1</sup>H} NMR (126 MHz, DMSO-*d*<sub>6</sub>) δ 192.28, 165.78, 132.45, 132.05, 128.13. LCMS, positive mode, *m/z*: 263 [M+H]<sup>+</sup>. HRMS (ESI-TOF) calcd. for C<sub>7</sub>H<sub>7</sub>BrN<sub>2</sub>O<sub>2</sub>S<sup>+</sup> [M+H]<sup>+</sup>: 262.9484, found 262.9474. Anal. calcd. for C<sub>7</sub>H<sub>7</sub>BrN<sub>2</sub>O<sub>2</sub>S: C 31.95; H 2.68; Br 30.37, N 10.65; S 12.19. Found: C 32.15; H 2.73; Br 30.12, N 10.34; S 12.29.

### *N-(4-methoxybenzylidene)-N'-methylsulfamide (14b)*

White powder, mp = 115–117 °C. Yield = 41% (2.09 g). <sup>1</sup>H NMR (400 MHz, DMSO-*d*<sub>6</sub>) δ 8.83 (s, 1H), 7.98 (d, *J* = 8.5 Hz, 2H), 7.87 (br. d, *J* = 4.7 Hz, 1H), 7.12 (d, *J* = 8.5 Hz, 2H), 3.87 (s, 3H), 2.55 (d, *J* = 5.2 Hz, 3H). <sup>13</sup>C{<sup>1</sup>H} NMR (126 MHz, DMSO-*d*<sub>6</sub>) δ 168.09,

## SUPPORTING INFORMATION

---

164.34, 132.93, 125.06, 114.83, 55.72, 29.01. LCMS, positive mode, m/z: 229 [M+H]<sup>+</sup>. HRMS (ESI-TOF) calcd. for C<sub>9</sub>H<sub>13</sub>N<sub>2</sub>O<sub>3</sub>S<sup>+</sup> [M+H]<sup>+</sup>: 229.0641, found 229.0638. Anal. calcd. for C<sub>9</sub>H<sub>12</sub>N<sub>2</sub>O<sub>3</sub>S: C 47.35; H 5.50; N 12.27; S 14.05. Found: C 47.46; H 5.37; N 12.17; S 14.03.

*(3S\*,7S\*)-2,6-dimethyl-3,7-bis(4-nitrophenyl)-1,5,2,4,6,8-dithiatetrazocane 1,1,5,5-tetraoxide (15e)*

Yellow crystalline powder. Yield = 30% (147mg). <sup>1</sup>H NMR (400 MHz, DMSO-*d*<sub>6</sub>) δ 9.47 (d, *J* = 10.6 Hz, 1H), 8.35 (d, *J* = 9.3 Hz, 2H), 7.70 (d, *J* = 8.5 Hz, 2H), 6.59 (d, *J* = 10.5 Hz, 1H), 3.34 (s, 3H), 2.63 (s, 3H). LCMS, negative mode, m/z: 485 [M-H]<sup>-</sup>. HRMS (ESI-TOF) calcd. for C<sub>16</sub>H<sub>19</sub>N<sub>6</sub>O<sub>8</sub>S<sub>2</sub><sup>+</sup> [M+H]<sup>+</sup>: 487.0700, found 487.0691. Anal. calcd. for C<sub>14</sub>H<sub>17</sub>N<sub>3</sub>O<sub>6</sub>S: C, 47.32; H, 4.82; N, 11.82; S, 9.02. Found: C, 47.09; H, 4.79; N, 11.66; S, 8.99.

## SUPPORTING INFORMATION

Figure S1. NMR reaction profile for **7ca**.

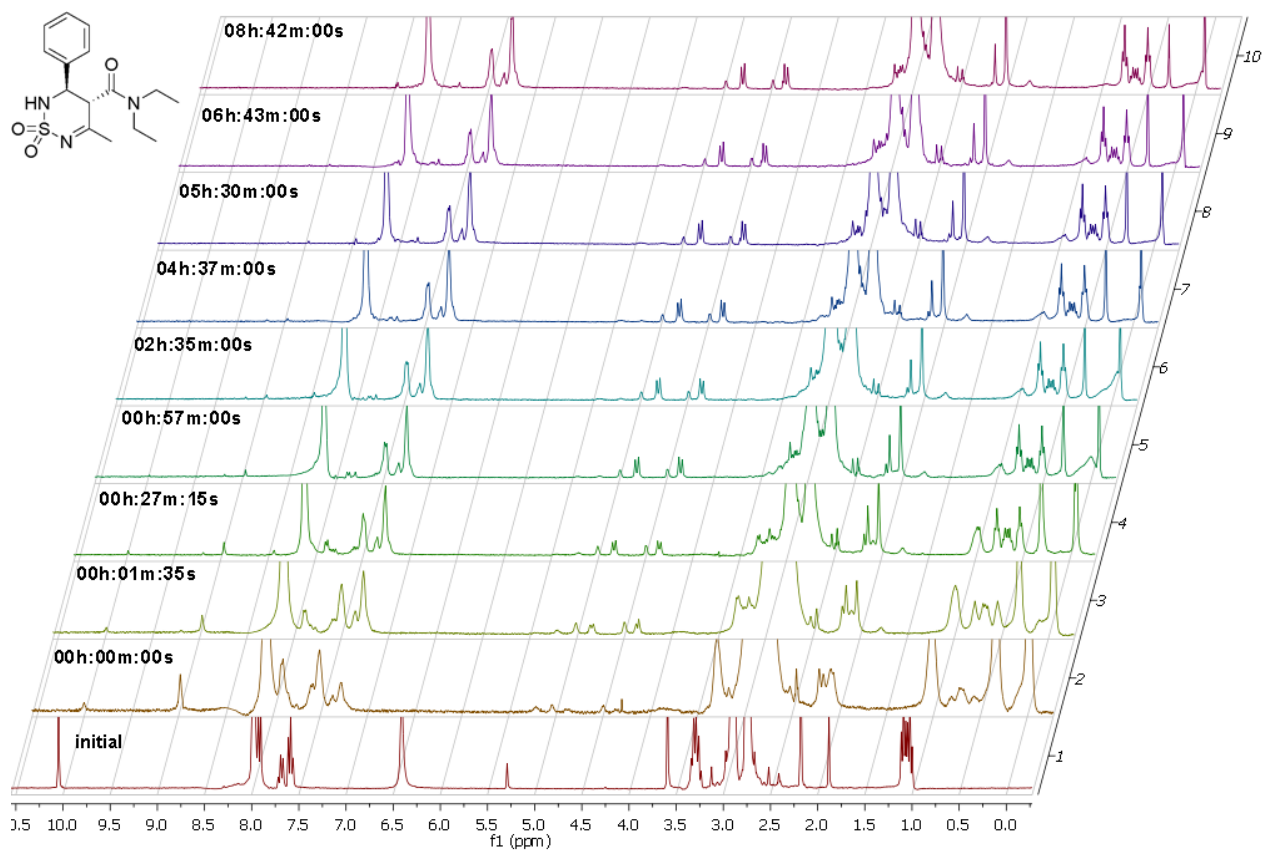

Figure S2. Degradation of **7cc**, 2 weeks.

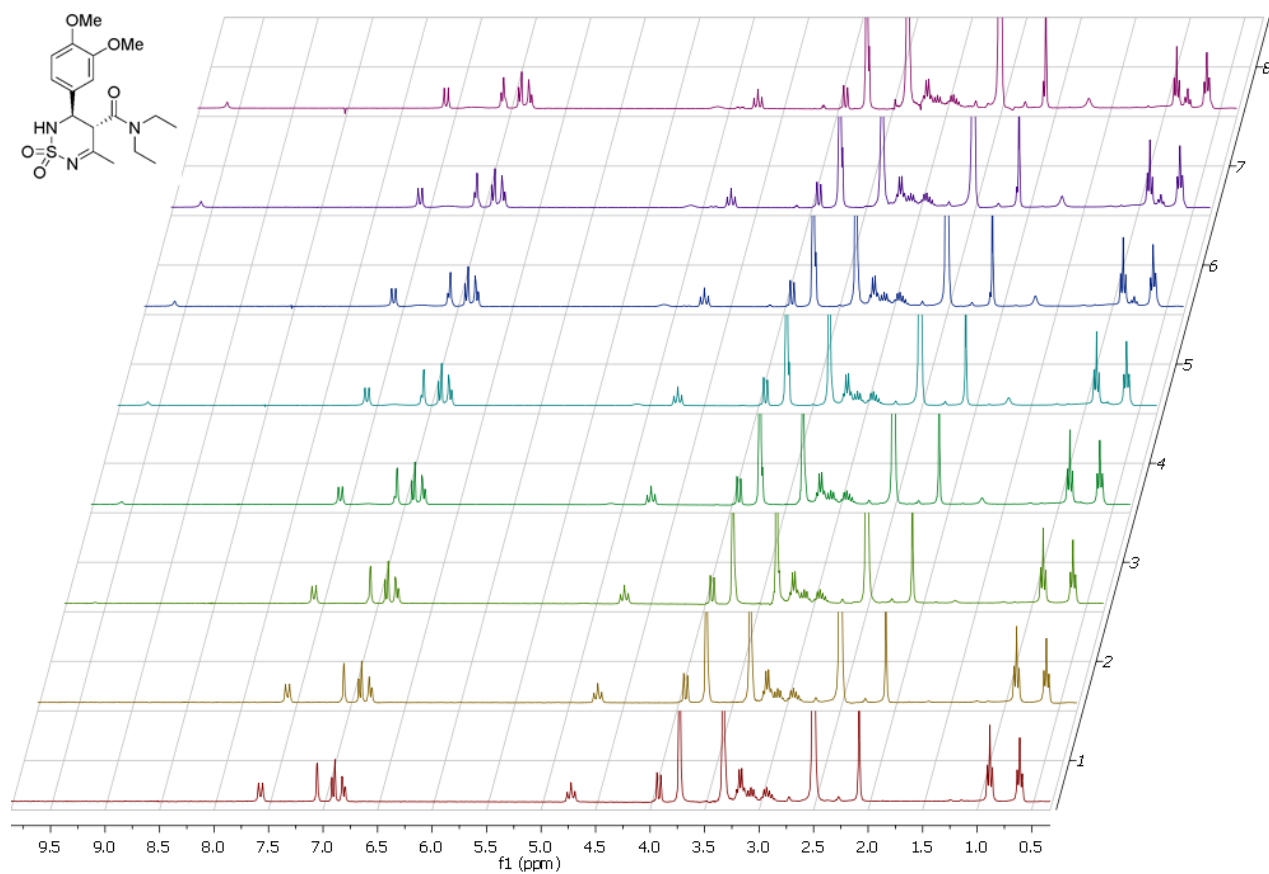

## SUPPORTING INFORMATION

**Figure S3.** Degradation of **7cd**, 2 weeks.

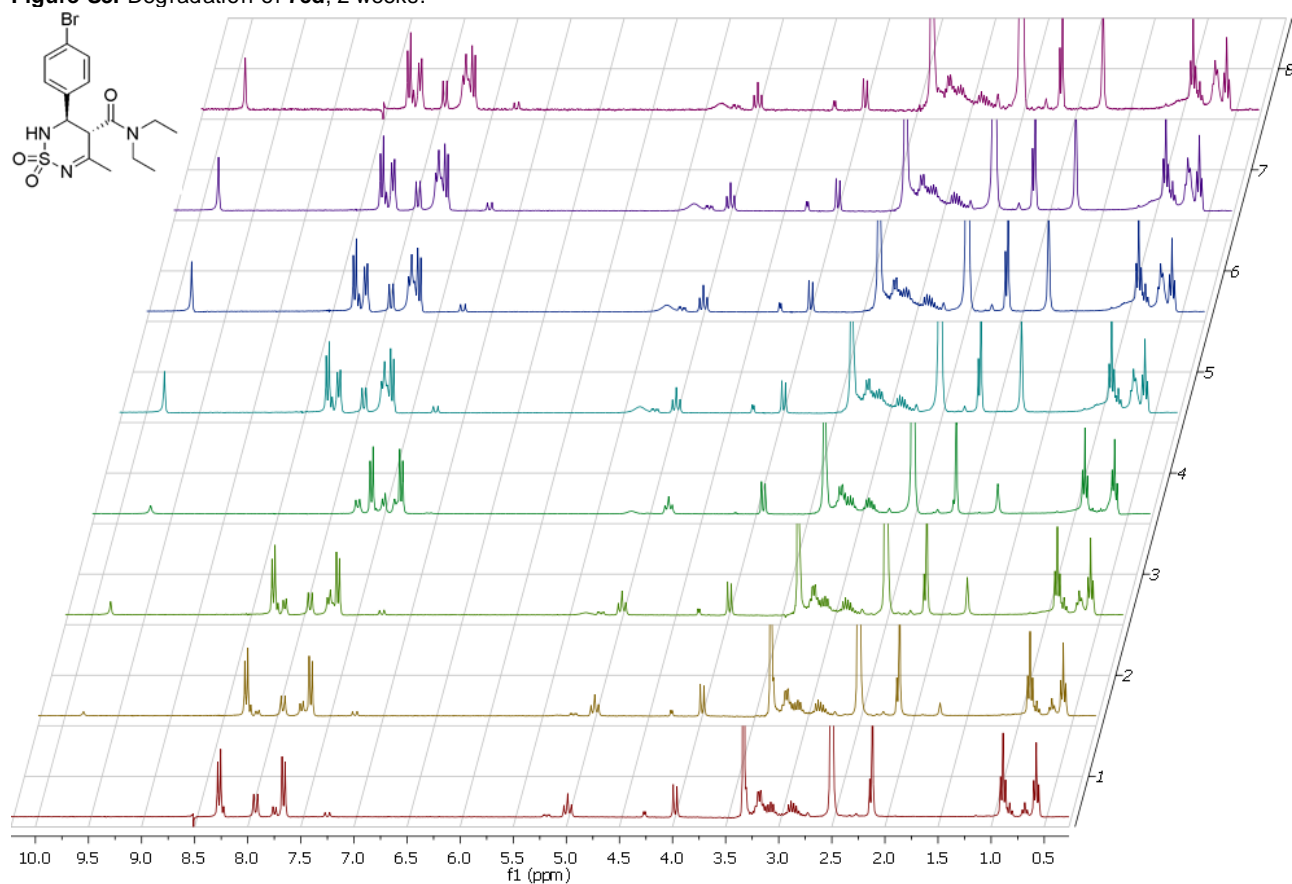

**Figure S4.** Degradation of **7ce**, 2 weeks.

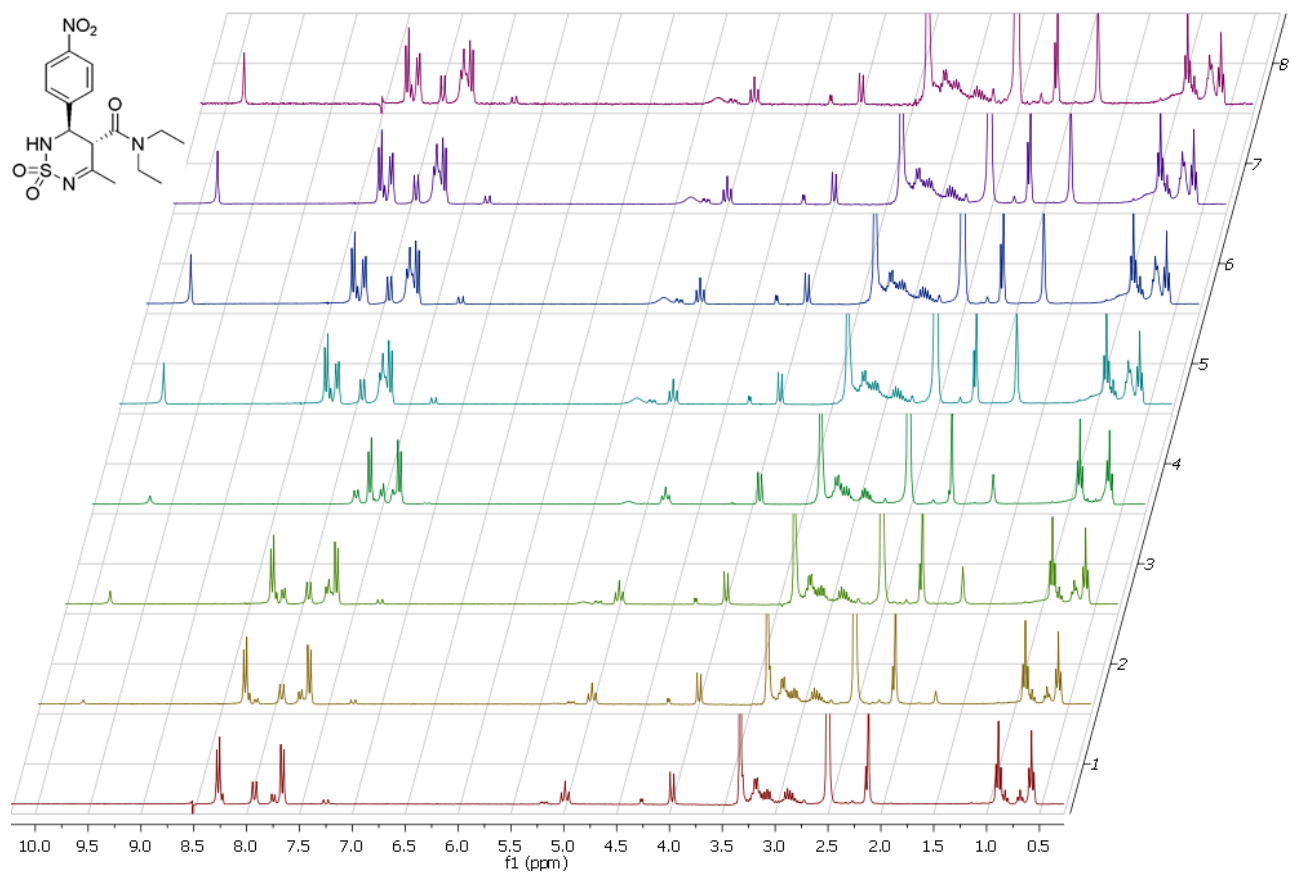



# SUPPORTING INFORMATION

Figure S5. Temperature NMR for **9cb**.

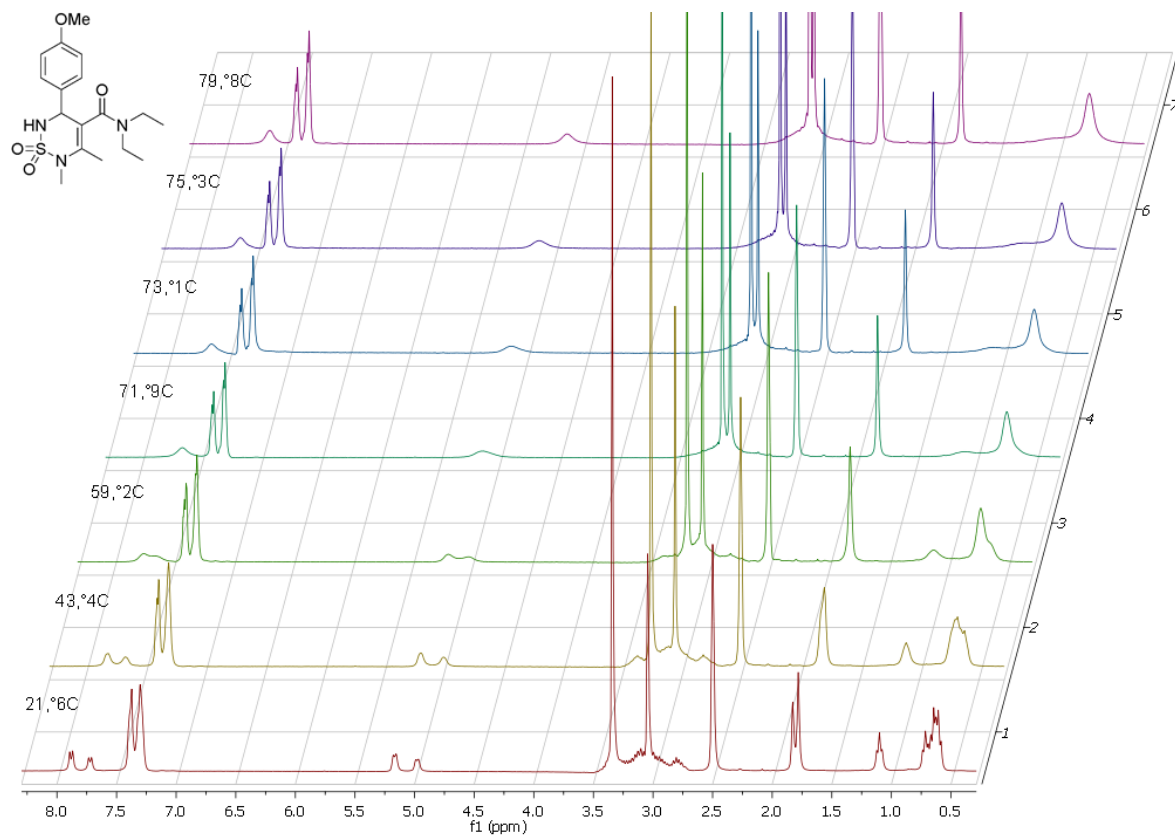

Figure S6. Temperature NMR for **10cb**.

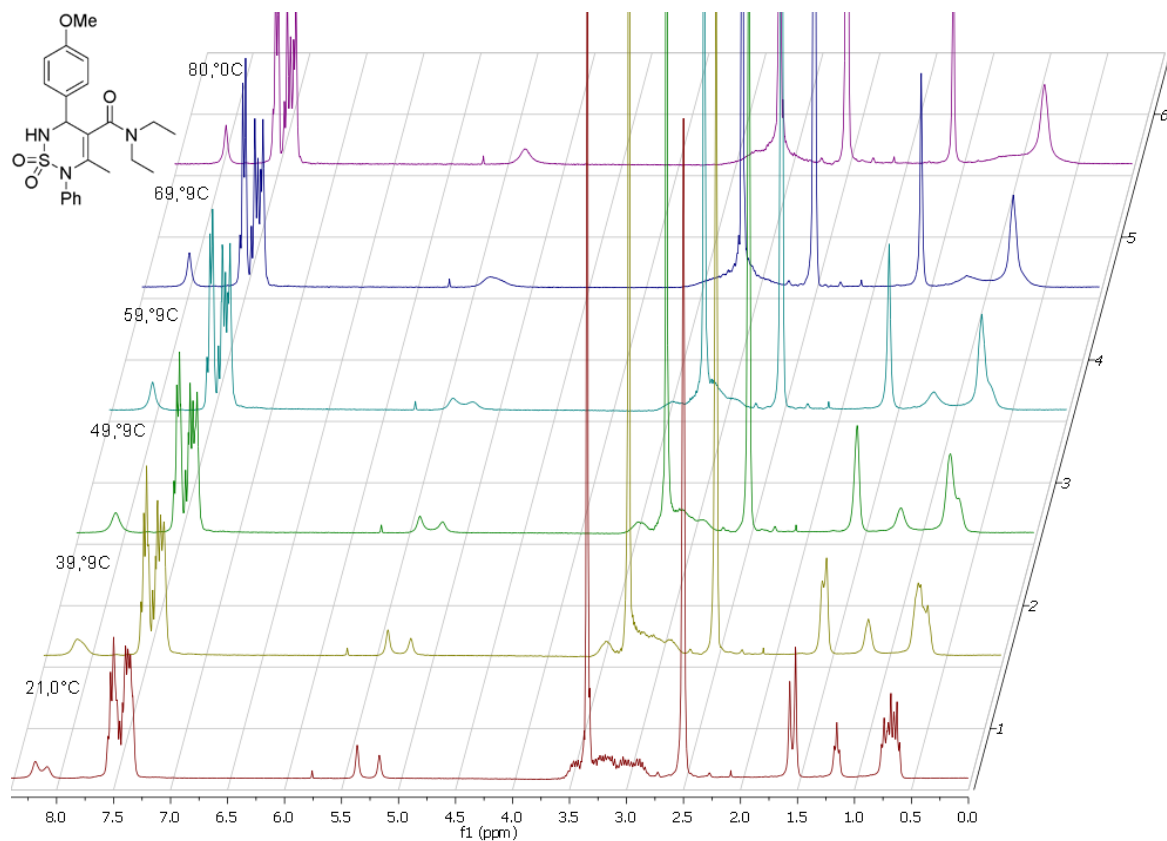

## SUPPORTING INFORMATION

Figure S7. Thermal profile of the initial steps of the reaction and the  $^1\text{H}$  NMR spectra of the reaction mixtures (the time scale in hours).

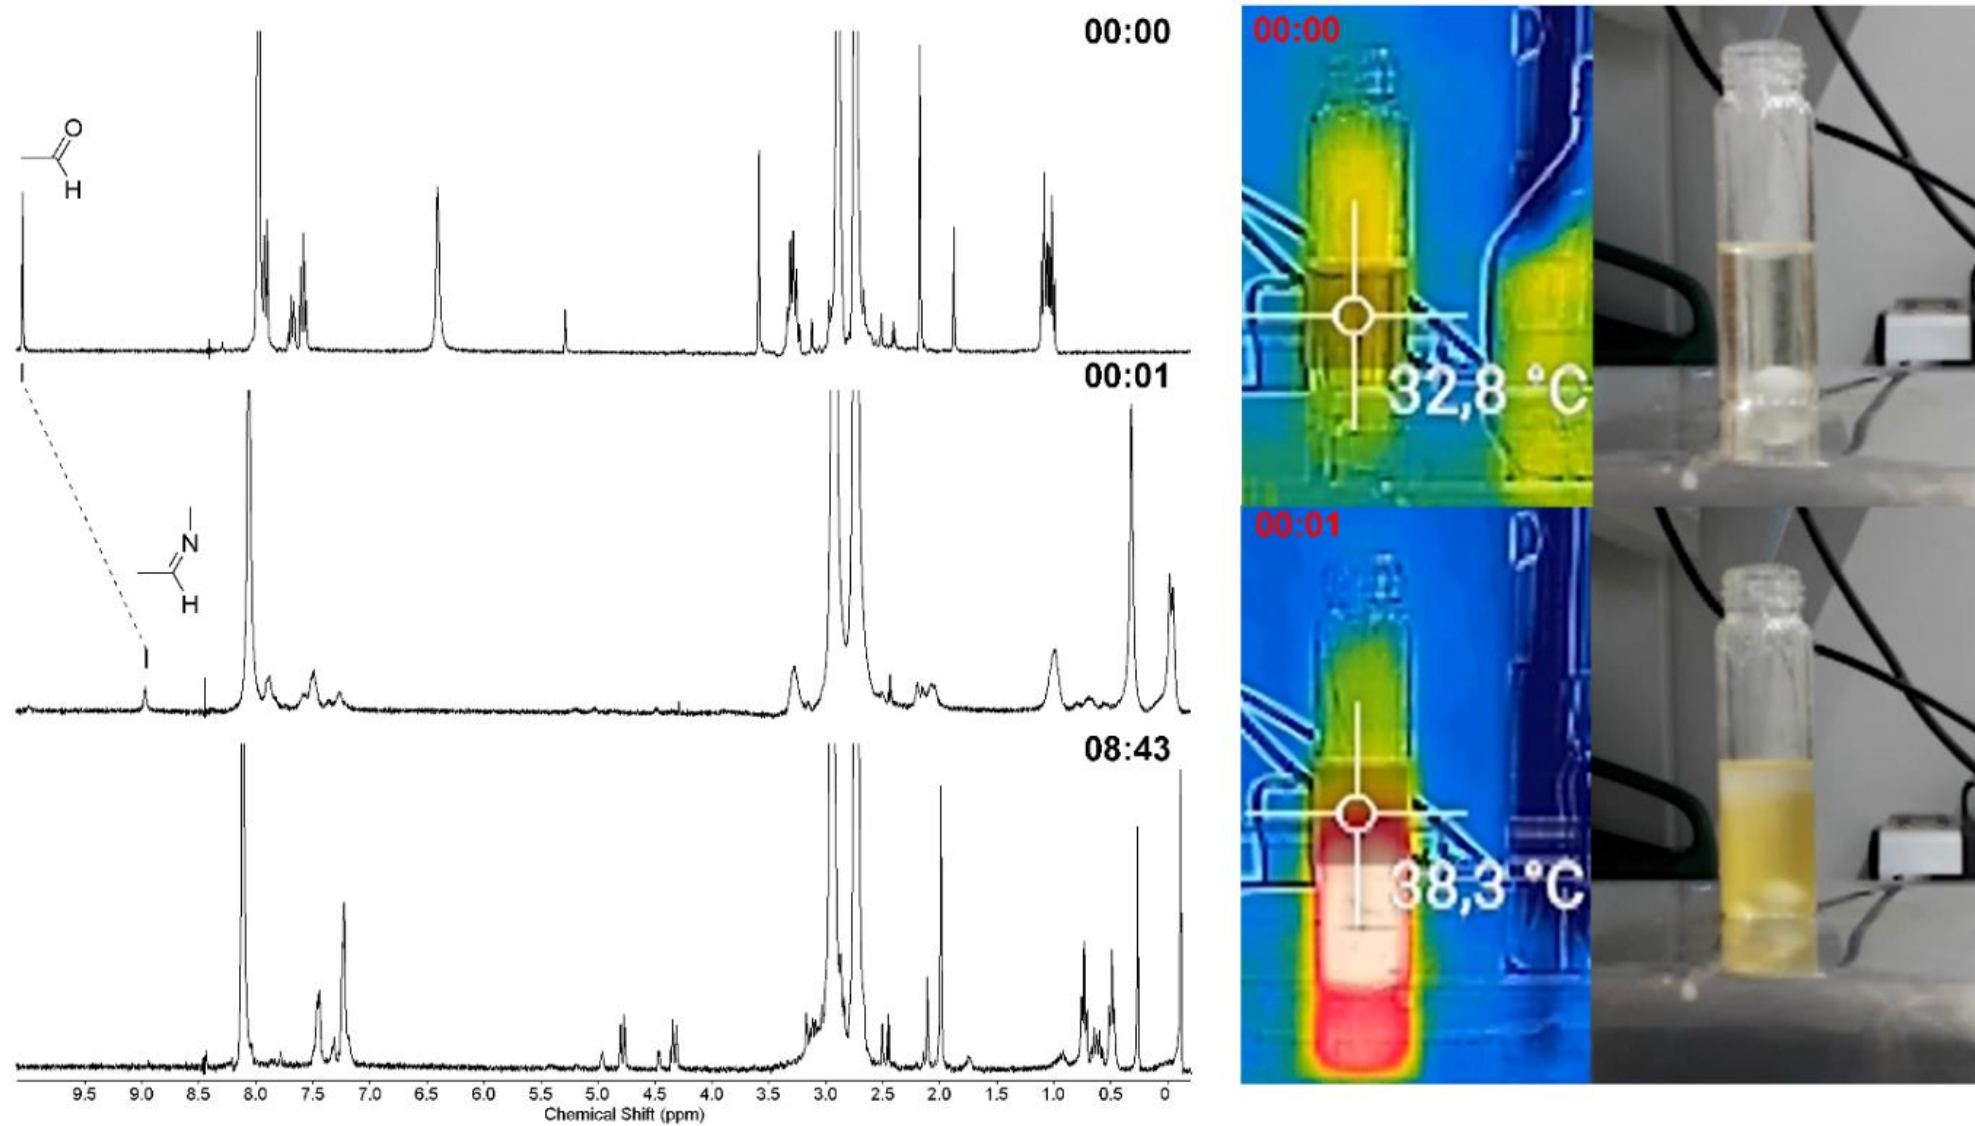

# SUPPORTING INFORMATION

## NMR spectra

### <sup>1</sup>H and <sup>13</sup>C NMR spectra of the compound 7ca

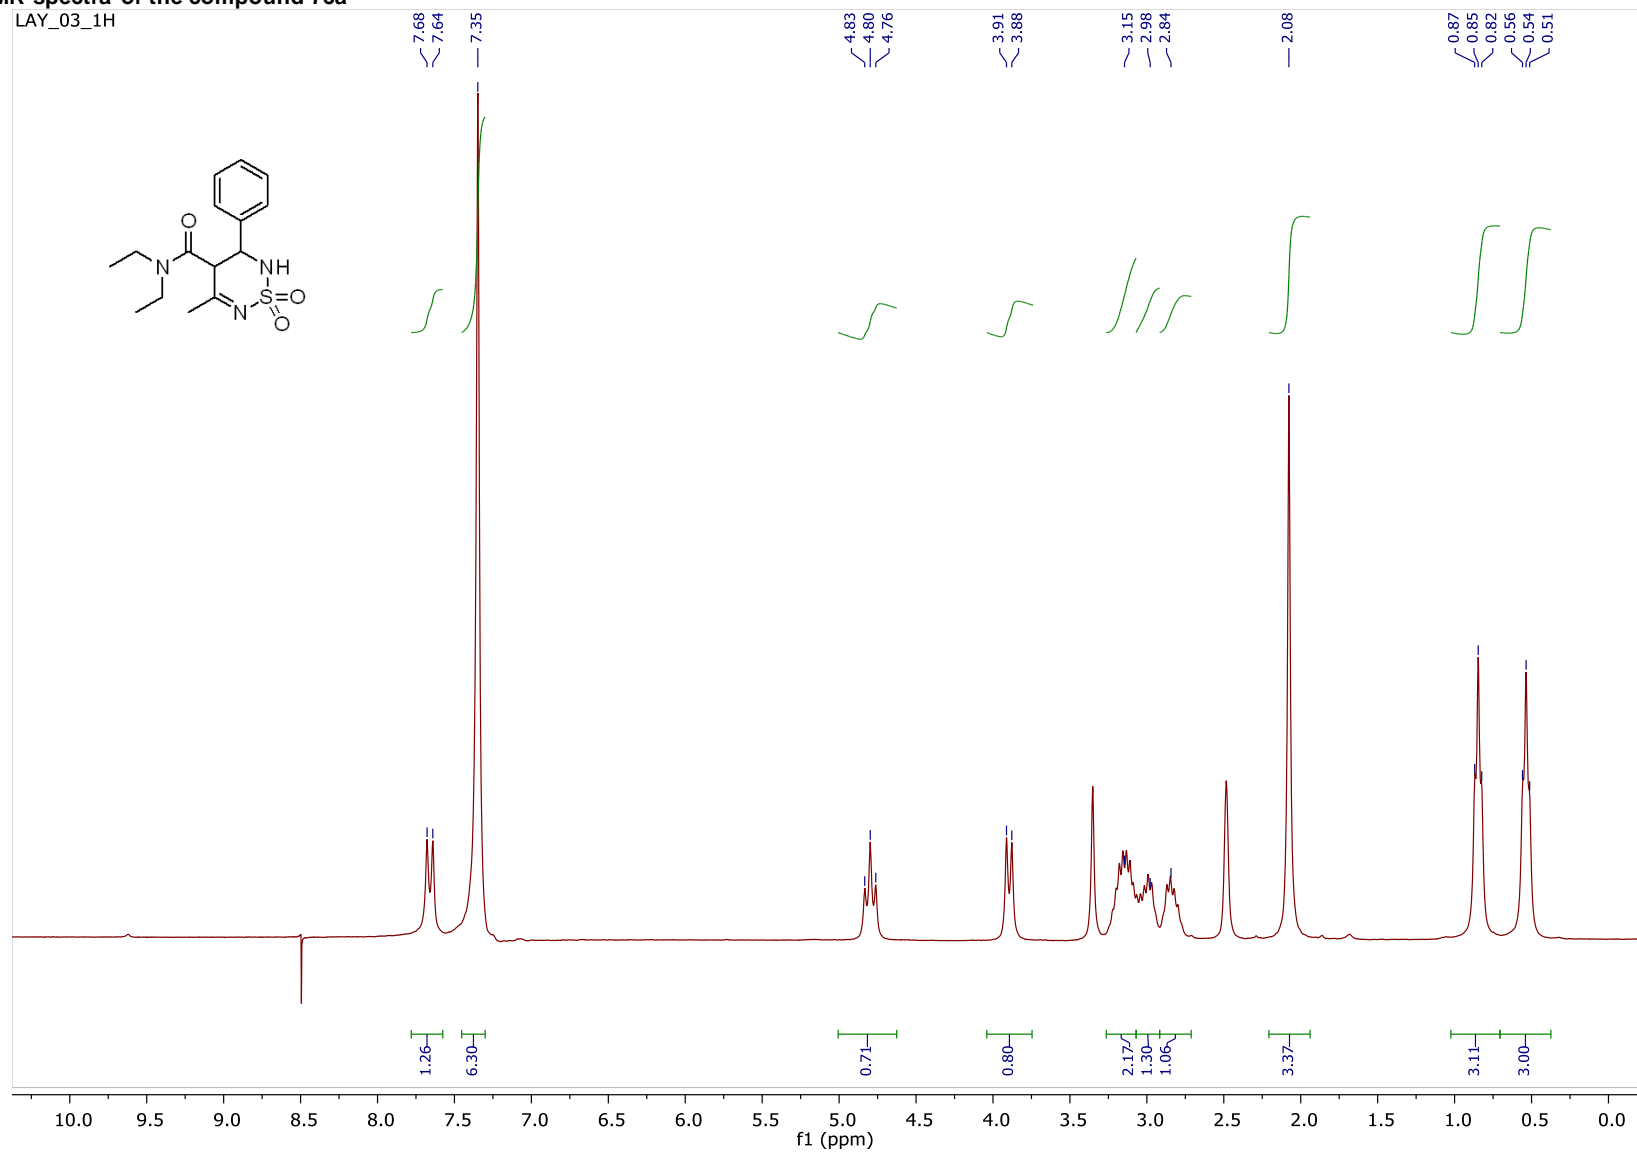

# SUPPORTING INFORMATION

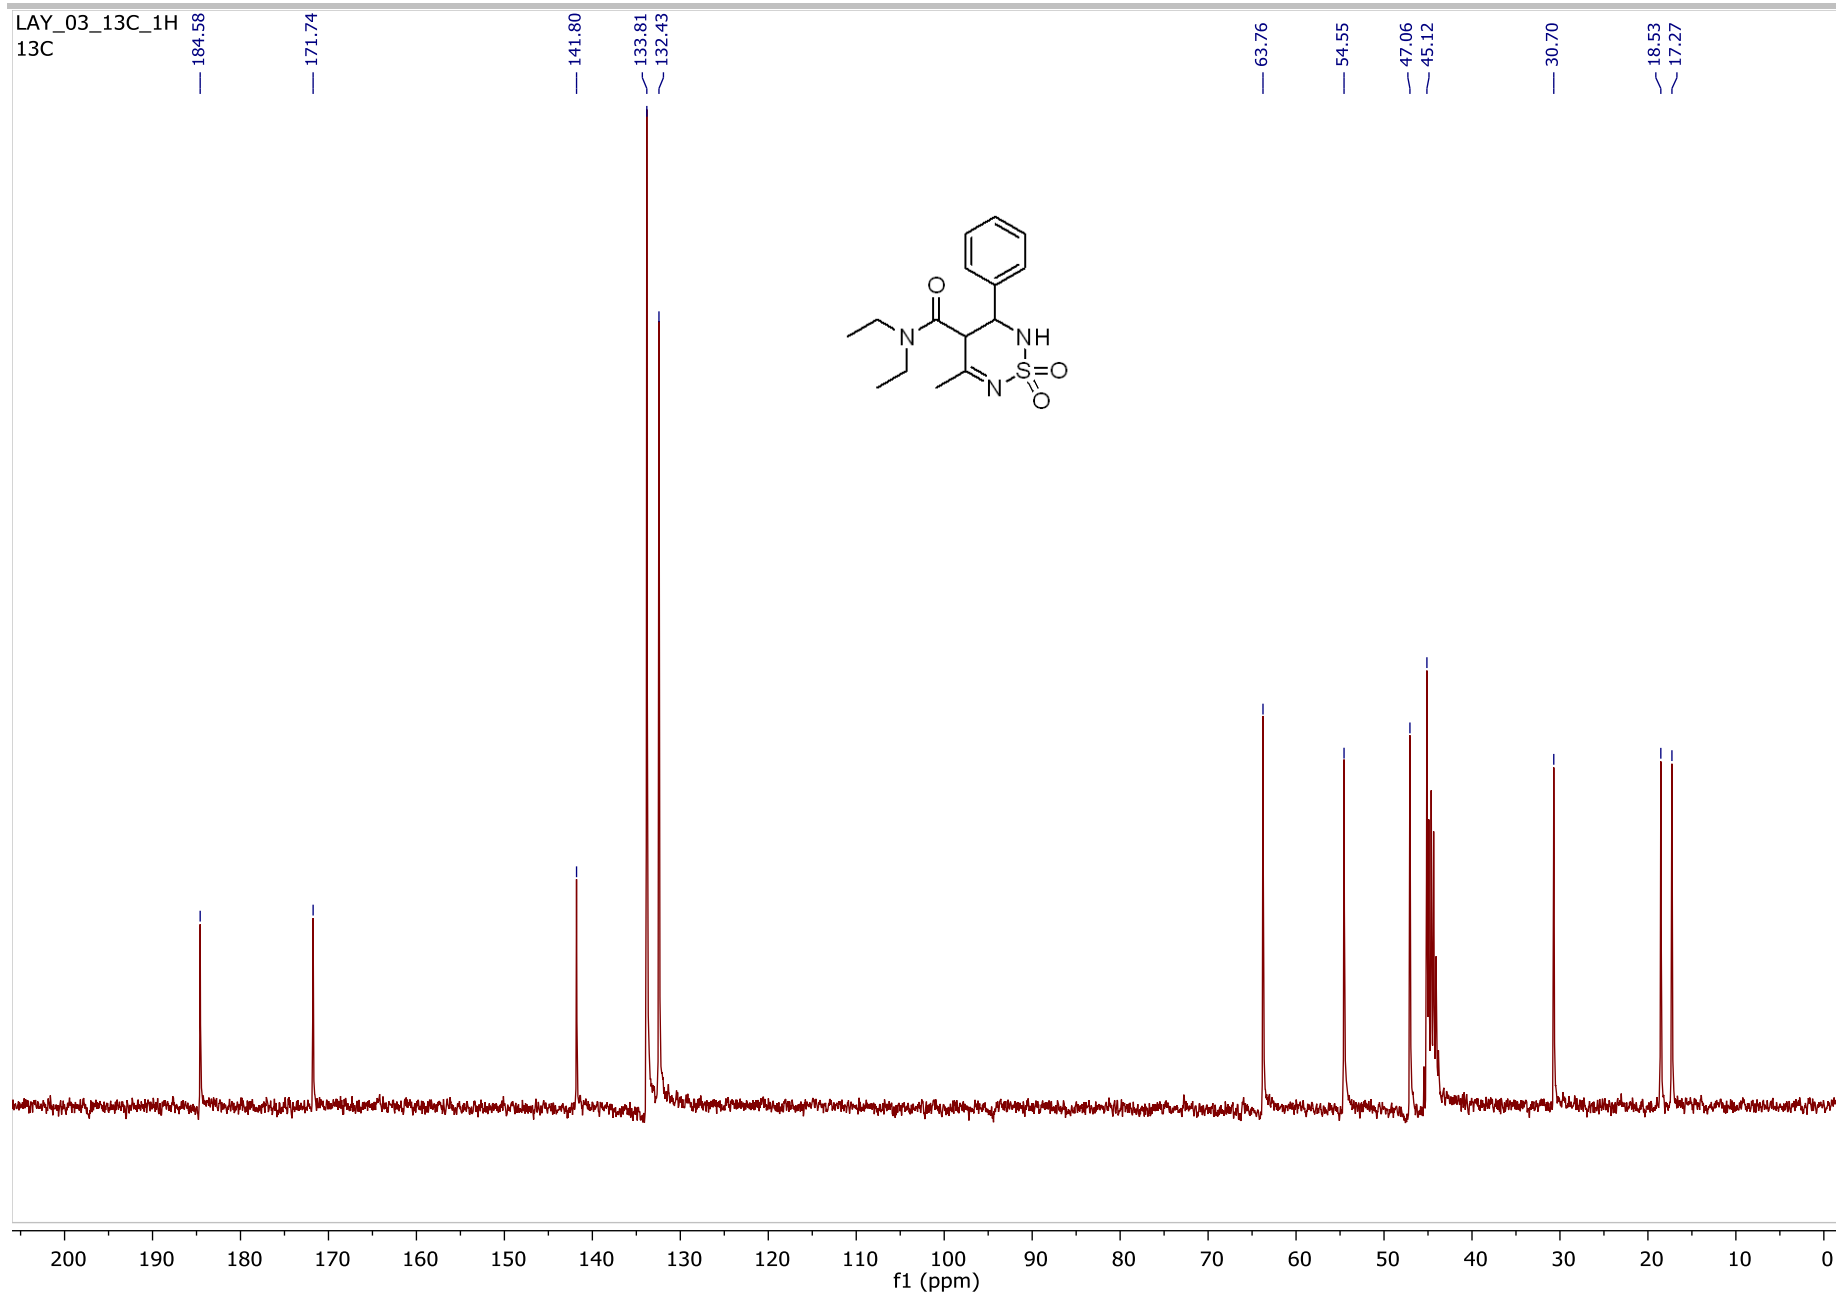

# SUPPORTING INFORMATION

## <sup>1</sup>H and <sup>13</sup>C NMR spectra of the compound 7da

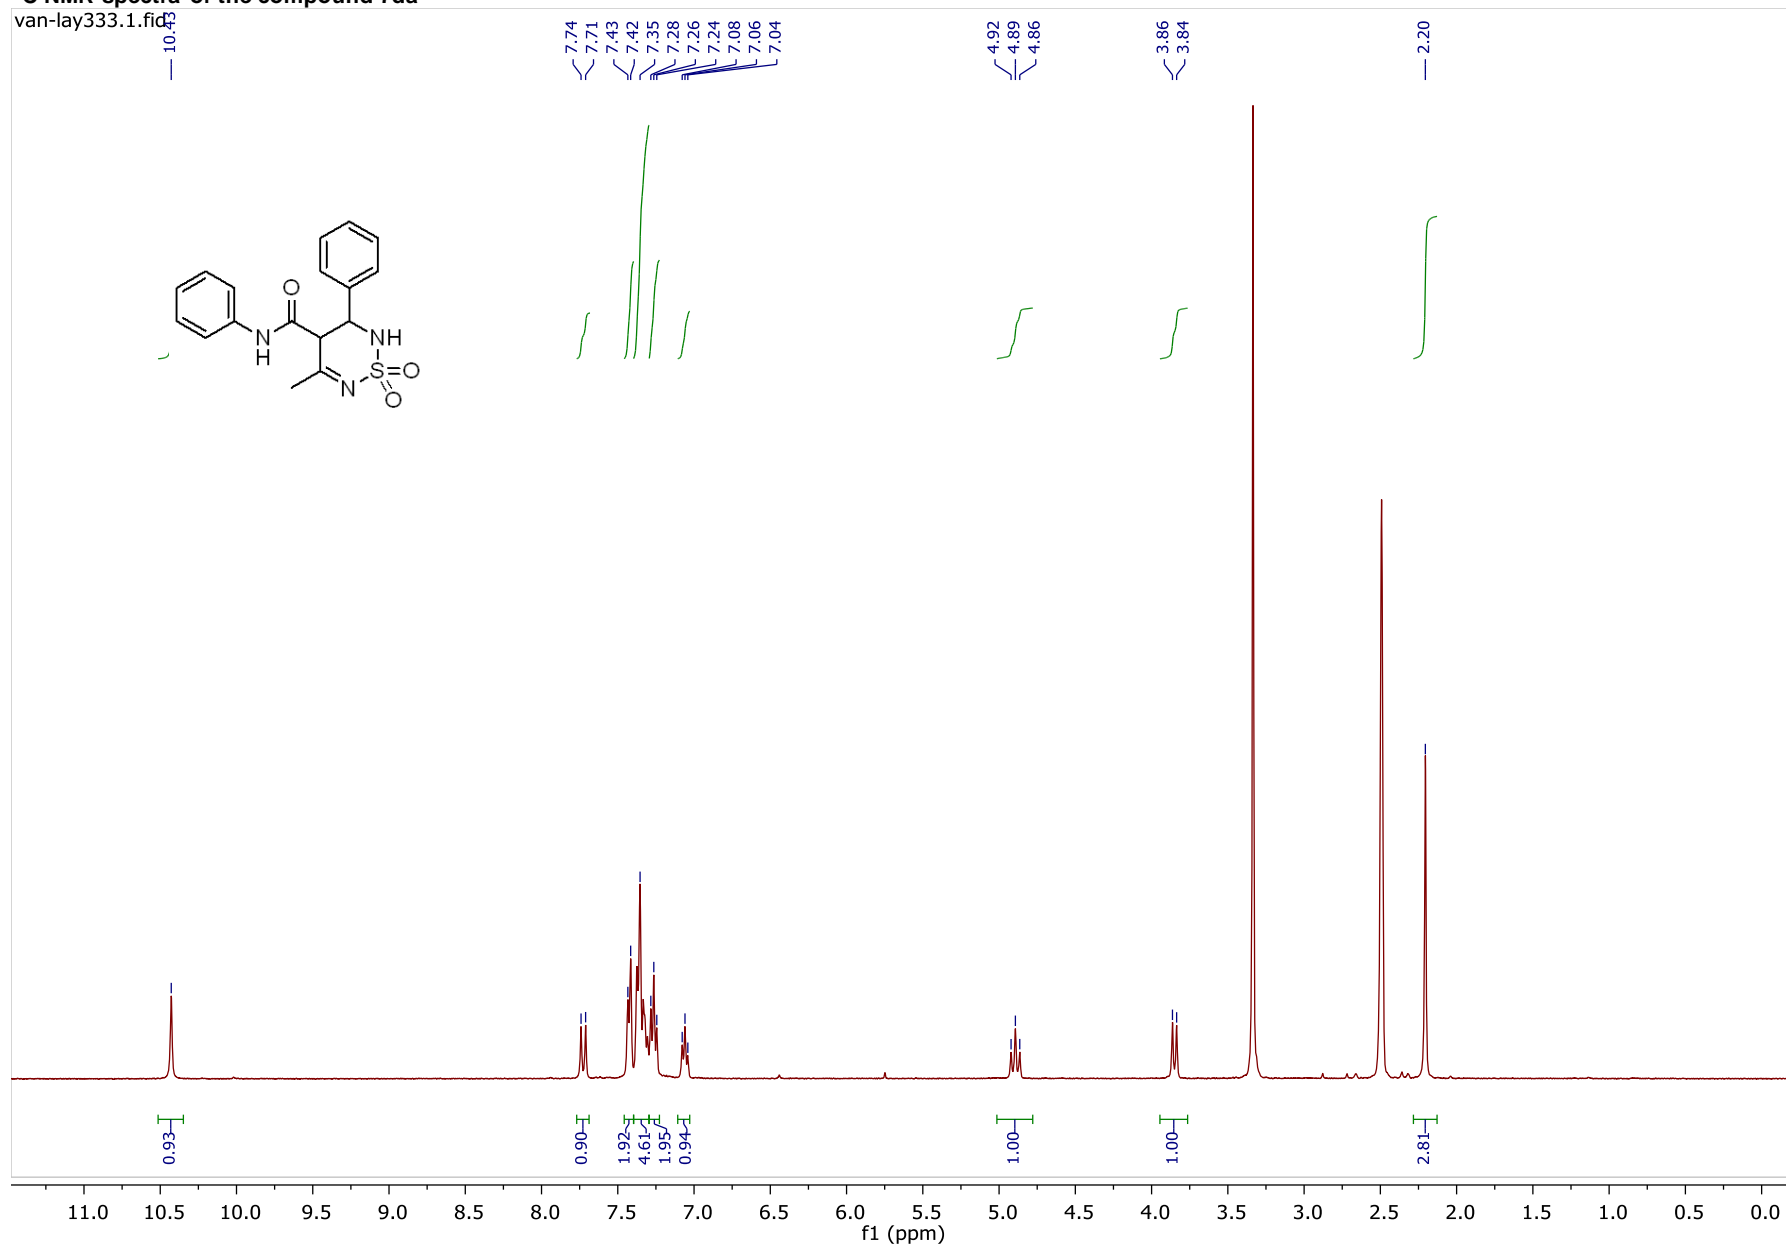

# SUPPORTING INFORMATION

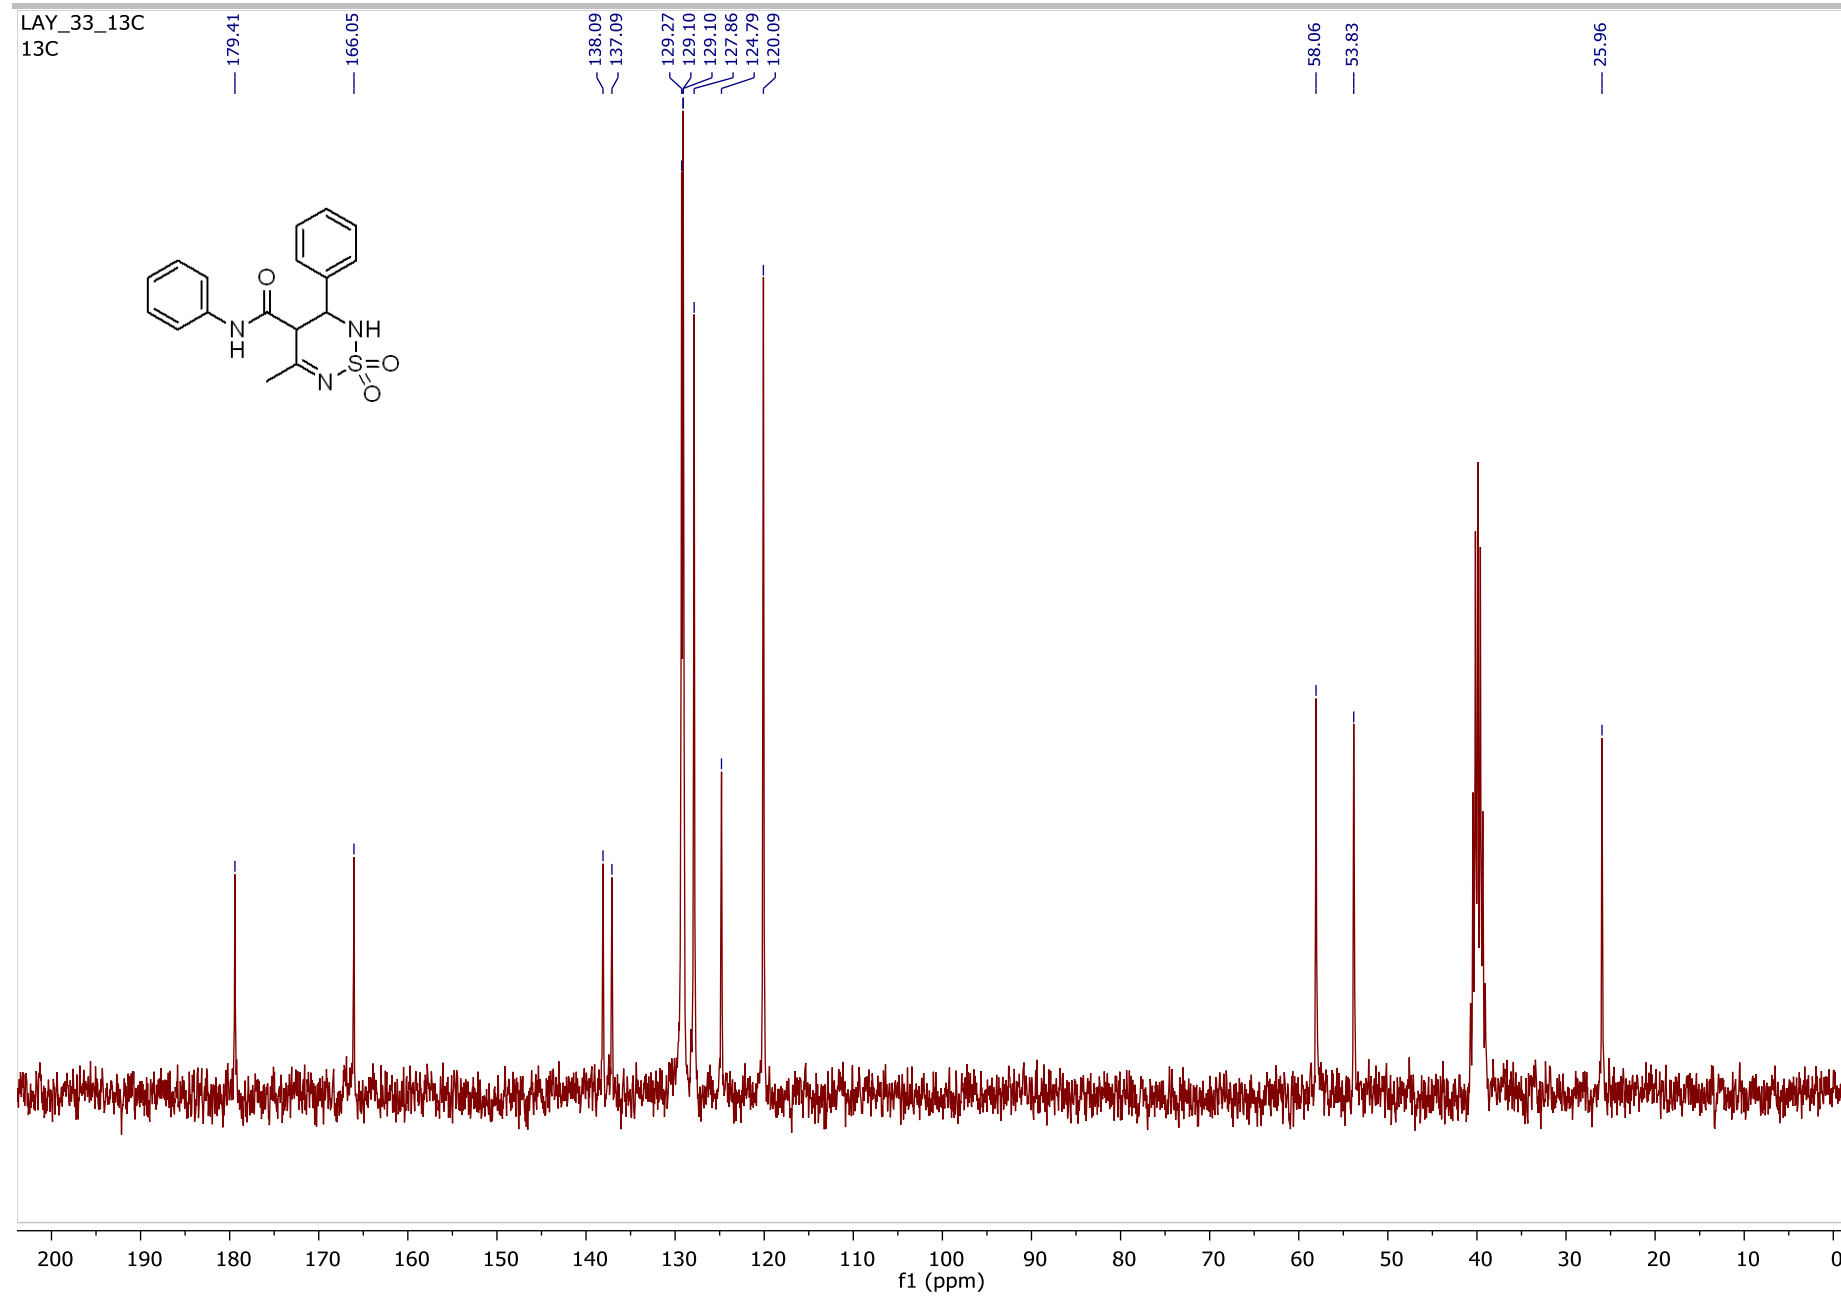

# SUPPORTING INFORMATION

## <sup>1</sup>H and <sup>13</sup>C NMR spectra of the compound 7ea

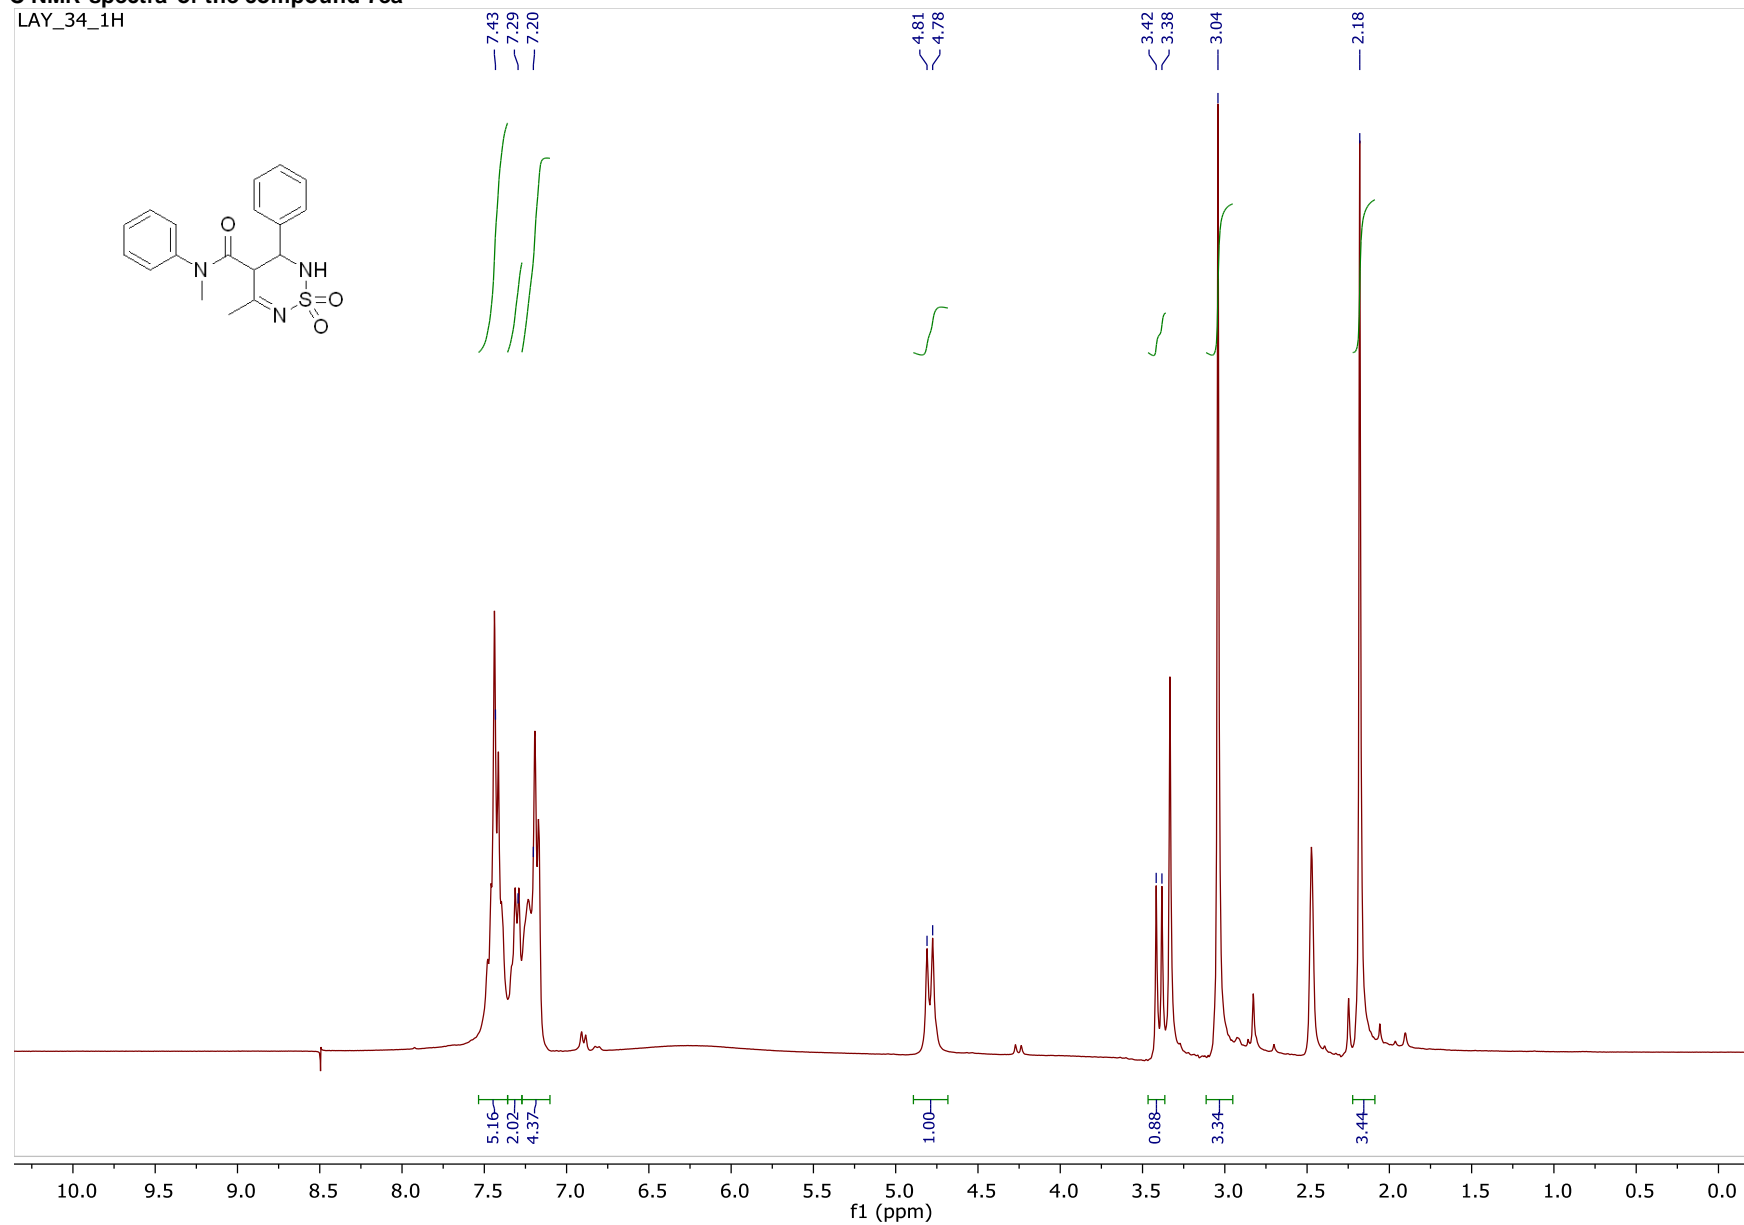

# SUPPORTING INFORMATION

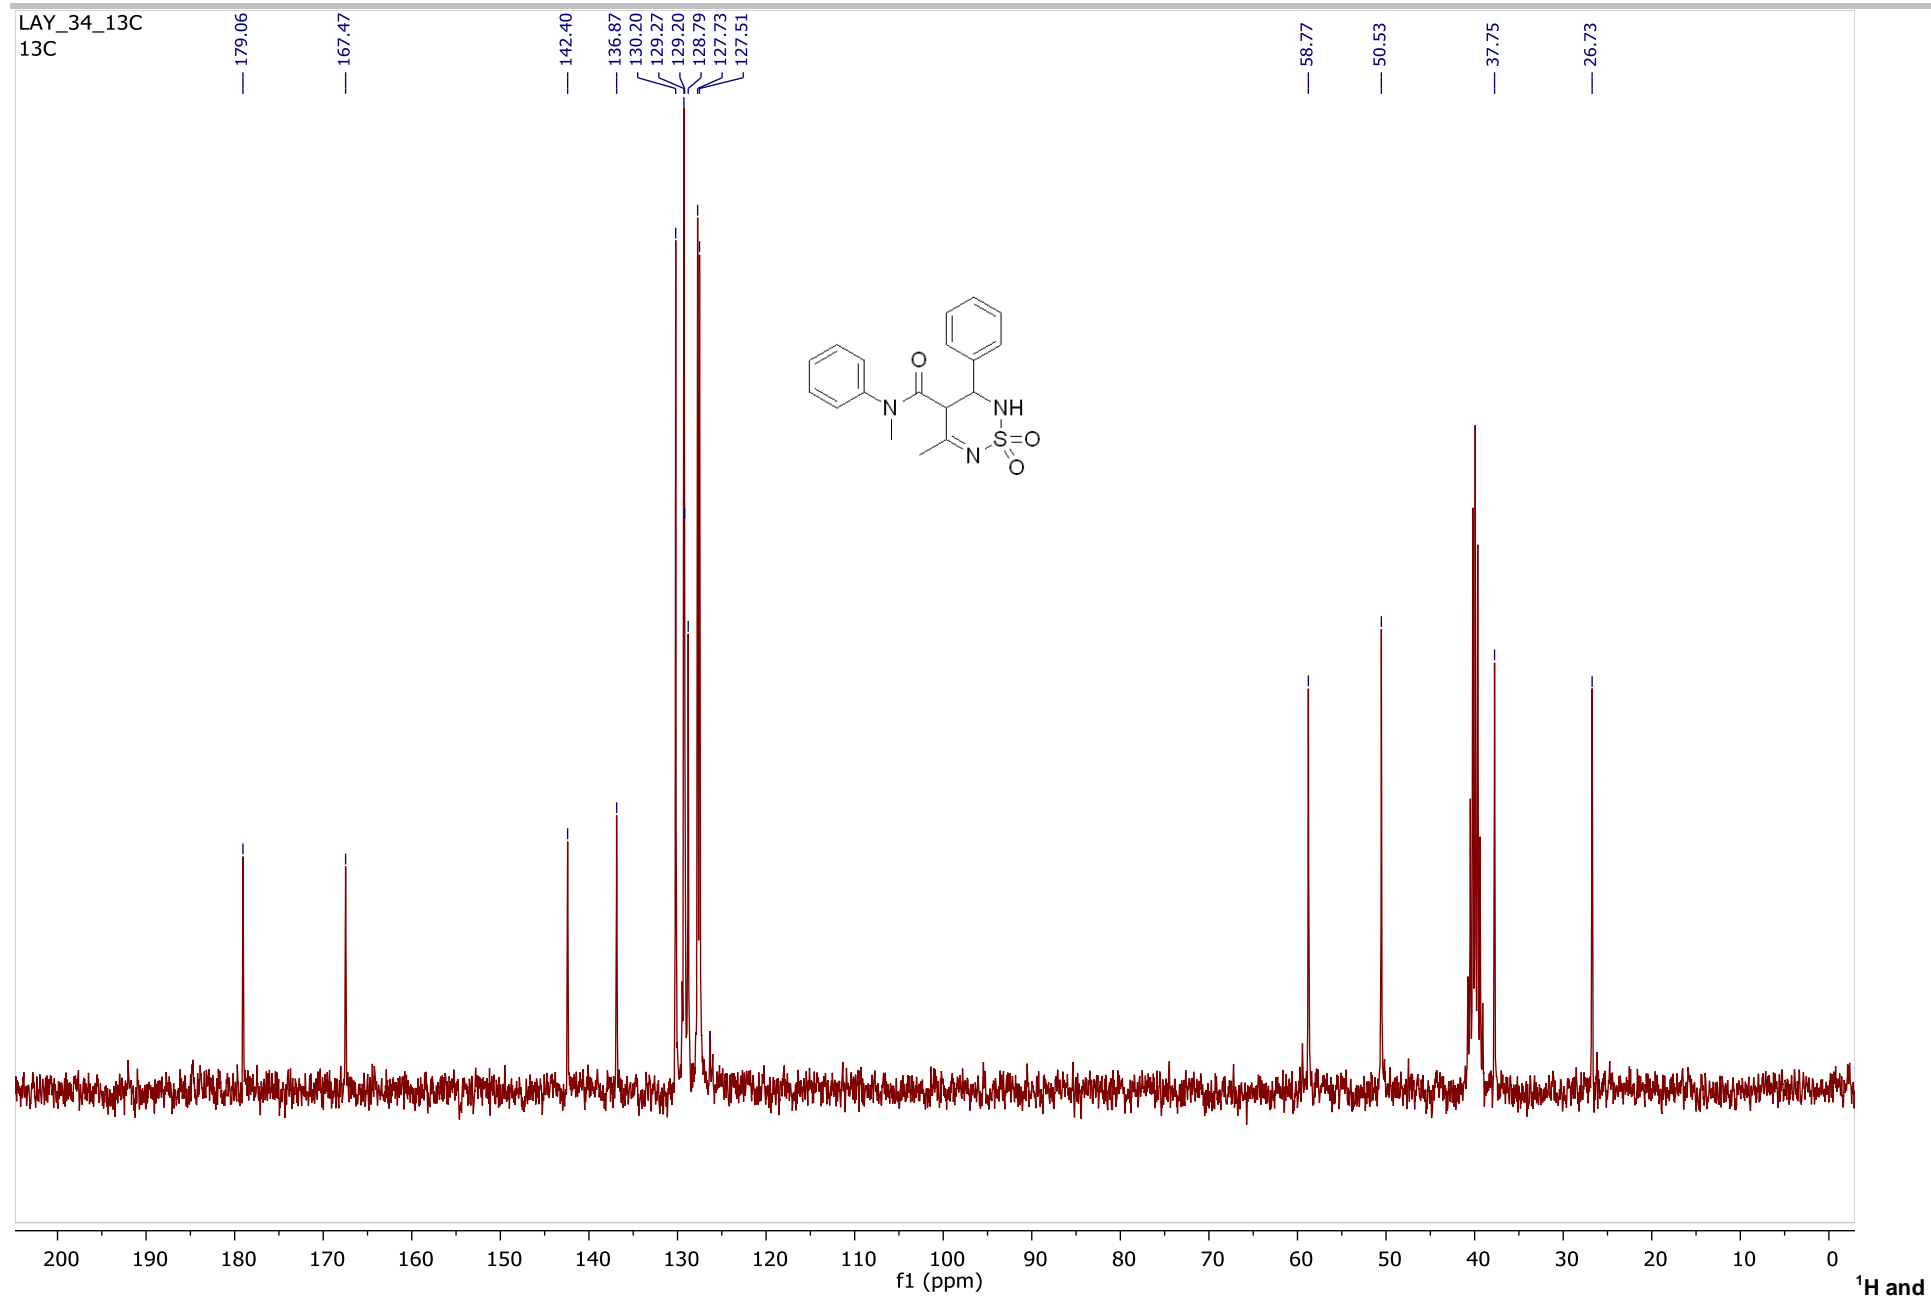



# SUPPORTING INFORMATION

## <sup>1</sup>H and <sup>13</sup>C NMR spectra of the compound 7bb

van-lay1802

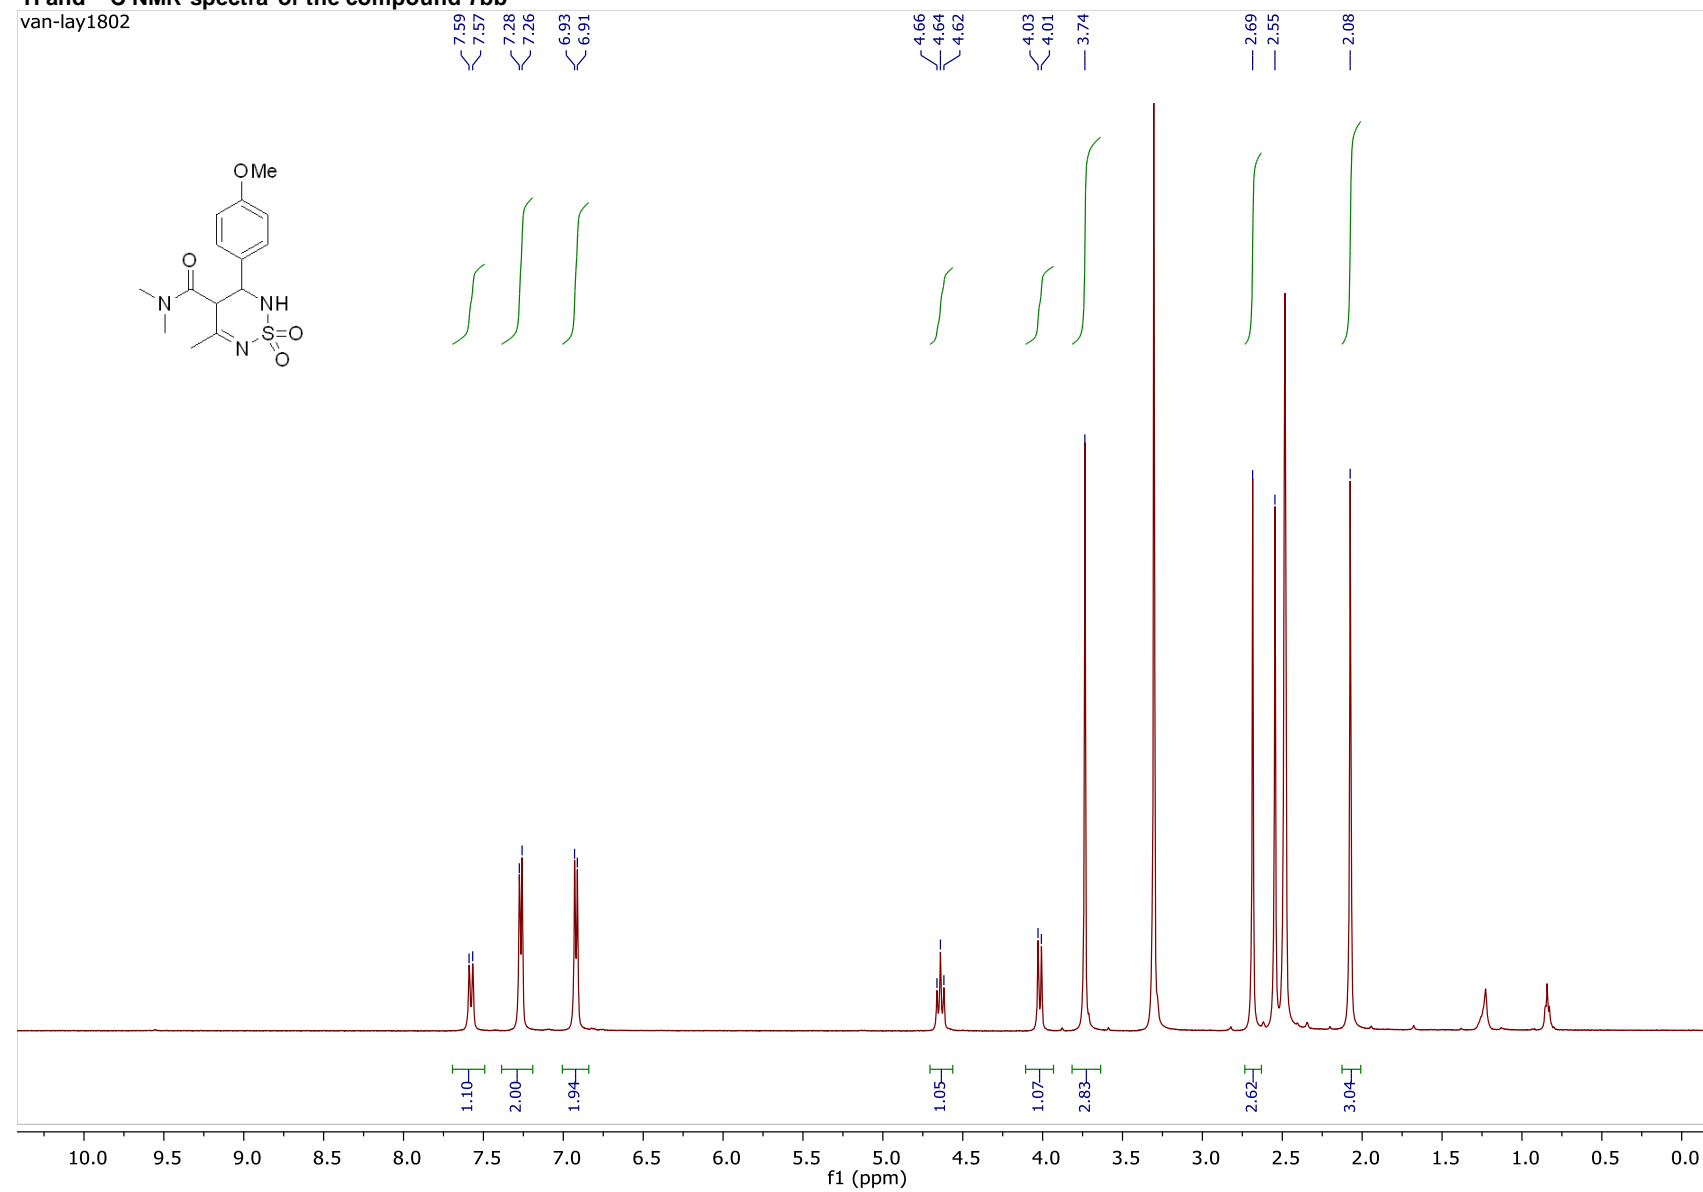

# SUPPORTING INFORMATION

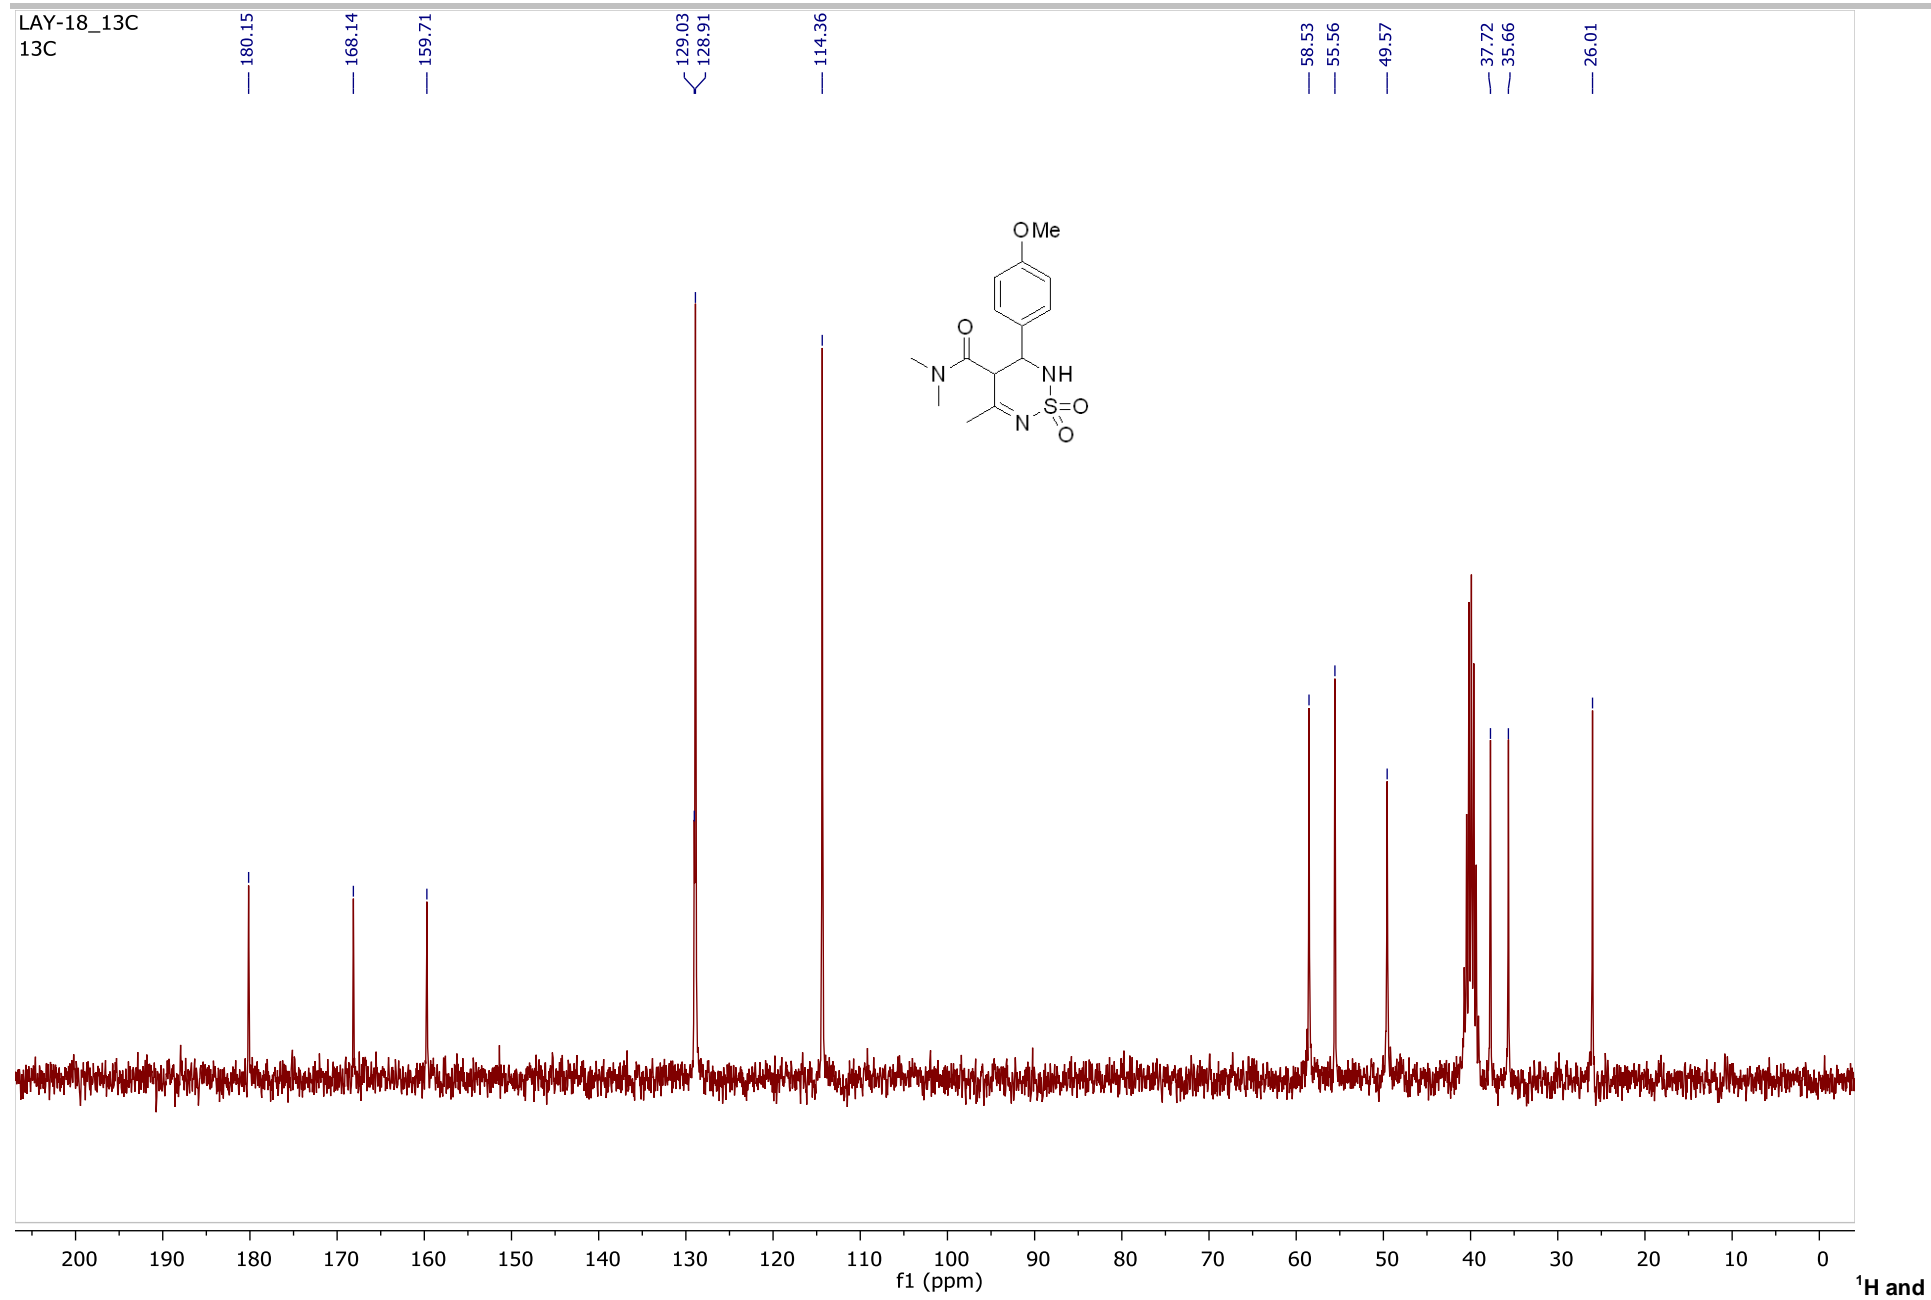

# SUPPORTING INFORMATION

## <sup>1</sup>H and <sup>13</sup>C NMR spectra of the compound 7cb

LAY\_17\_1H

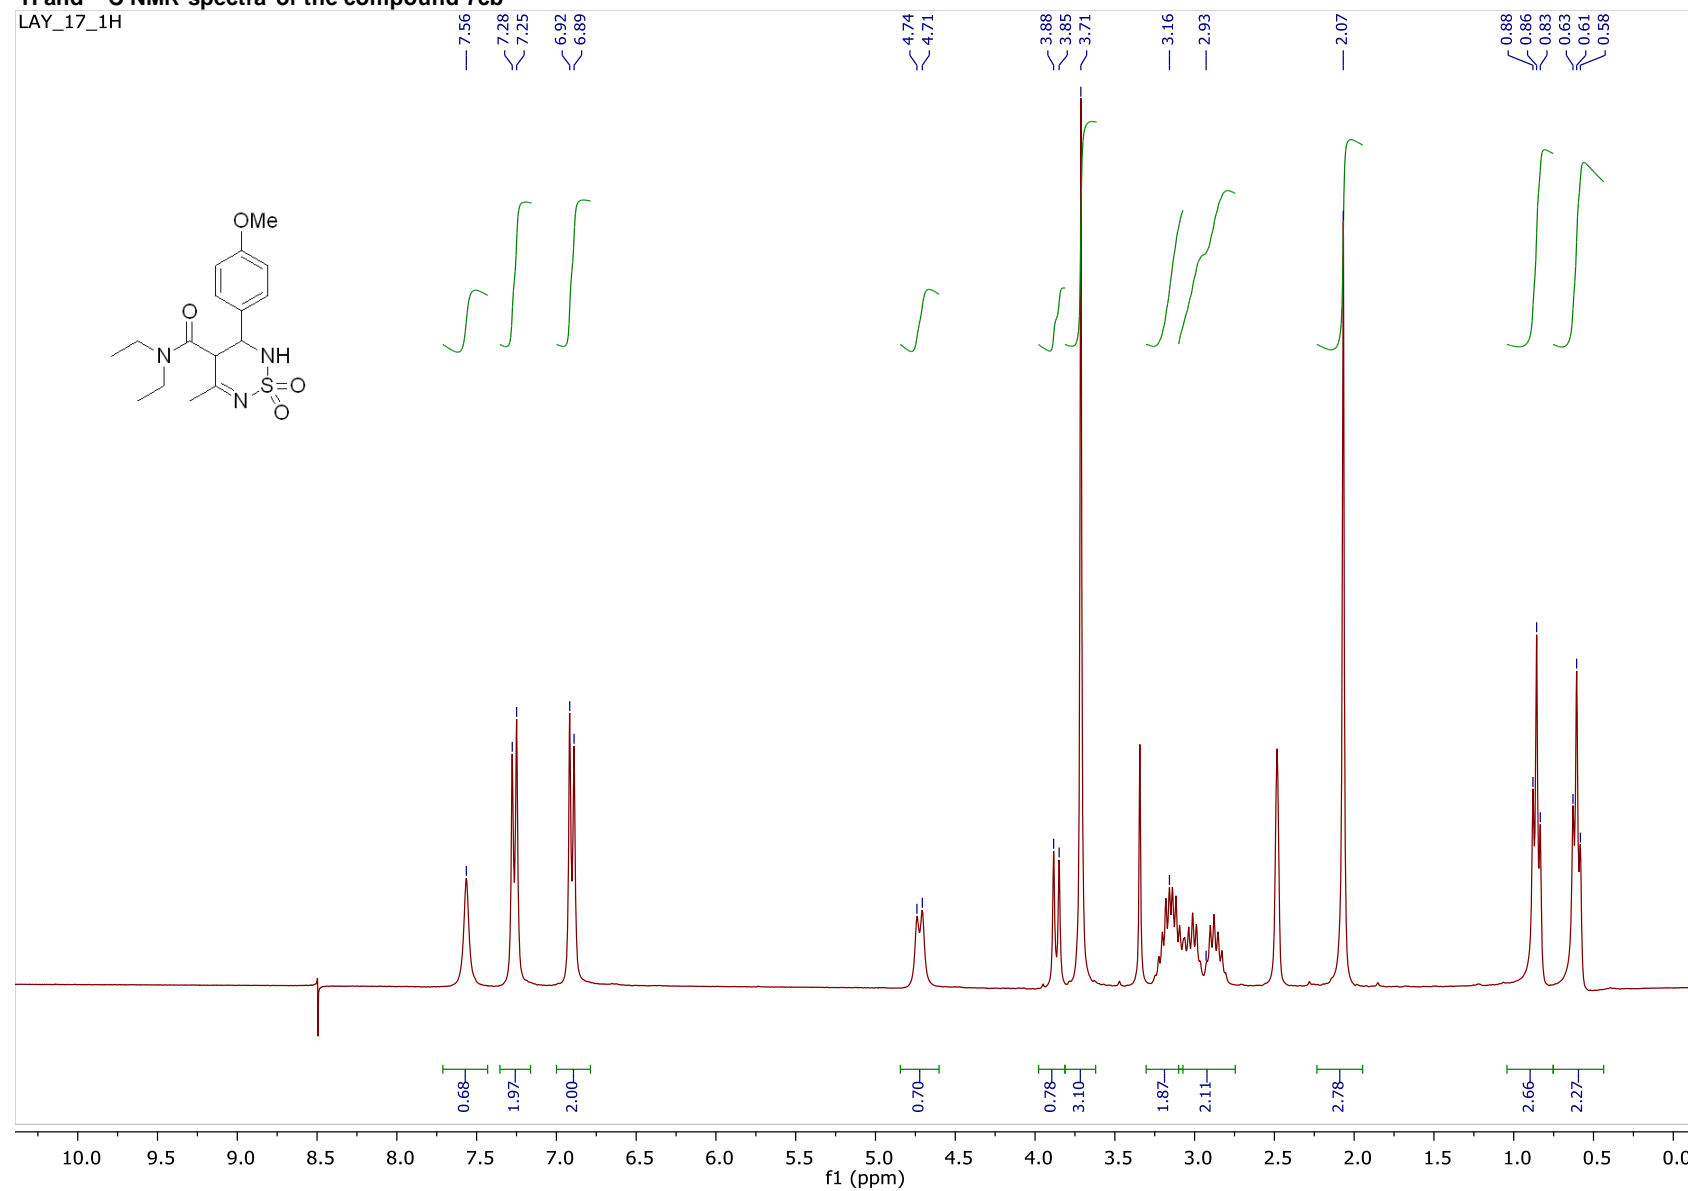

# SUPPORTING INFORMATION

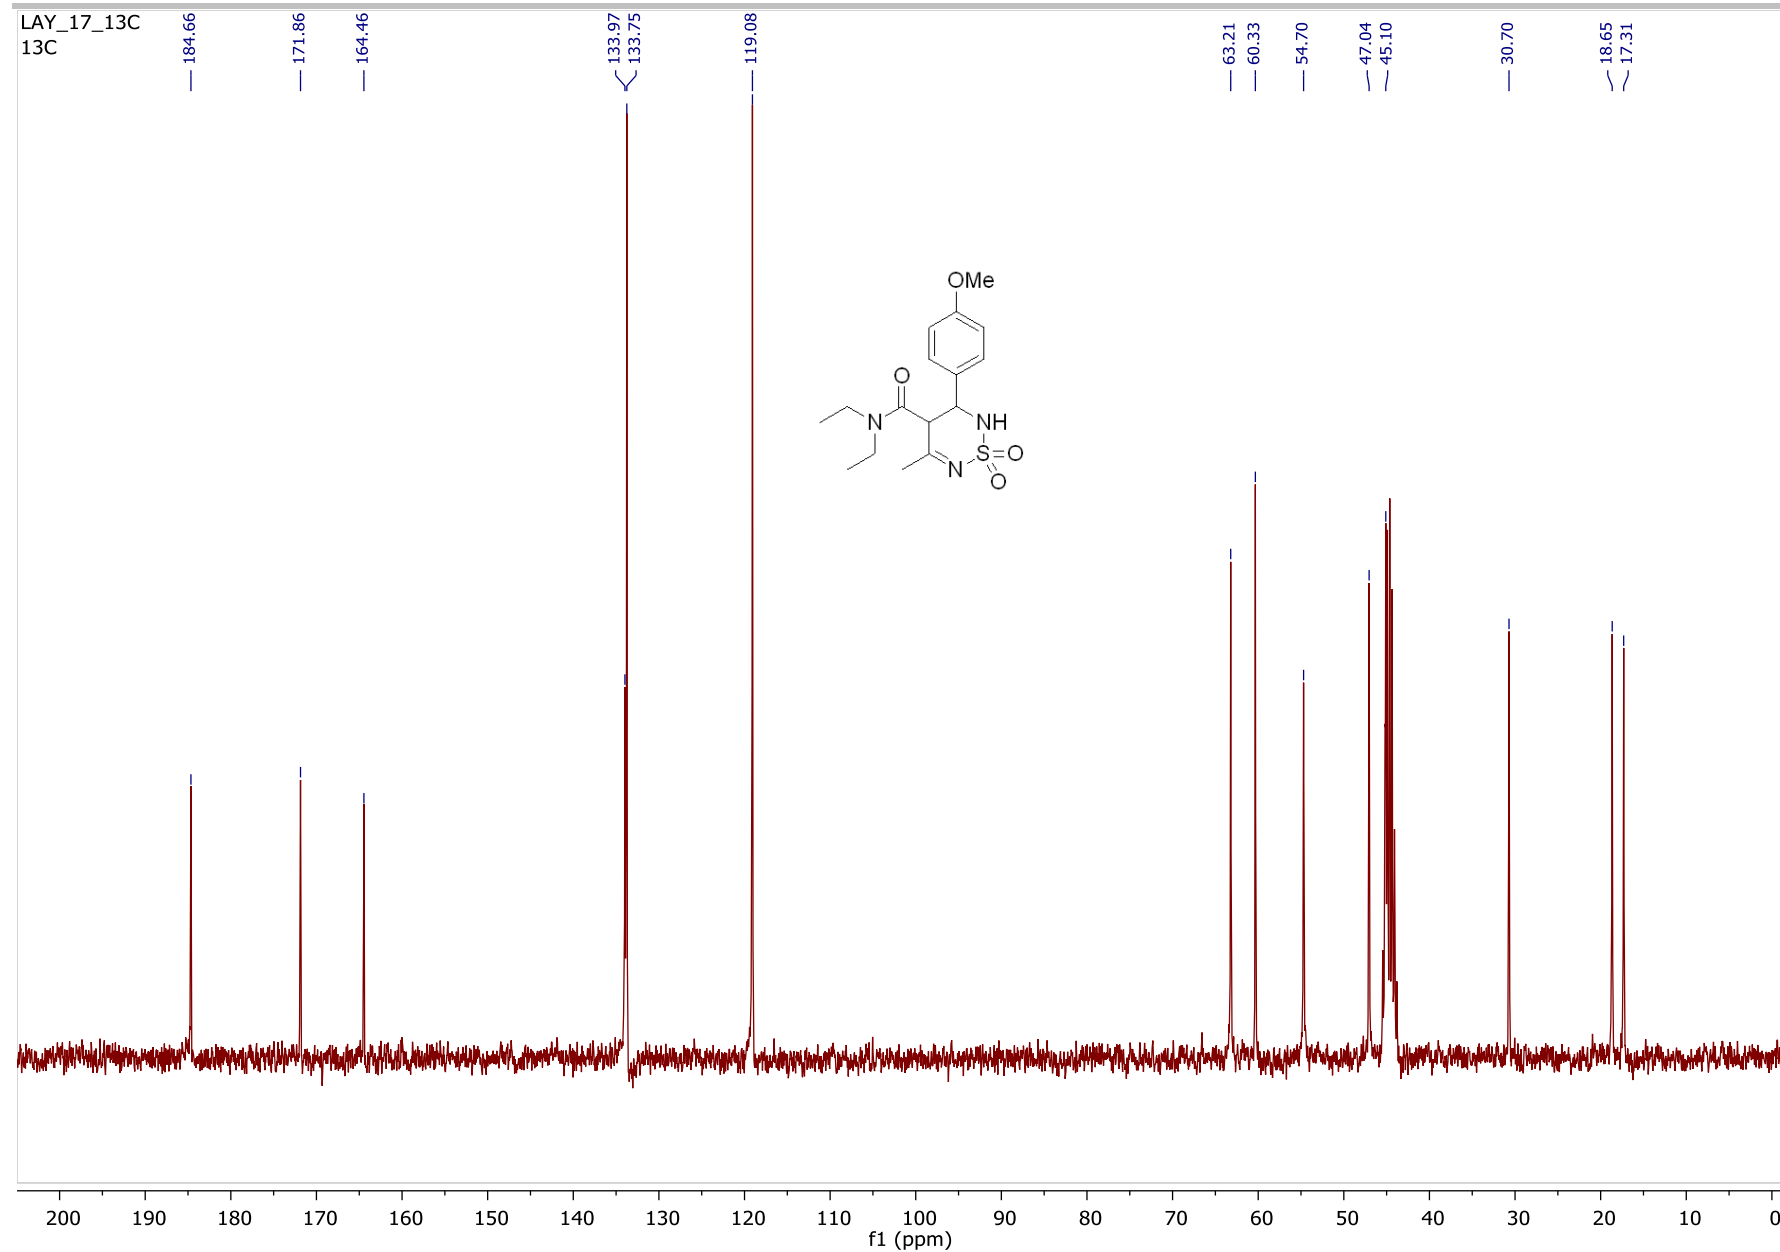

# SUPPORTING INFORMATION

## <sup>1</sup>H and <sup>13</sup>C NMR spectra of the compound 7db

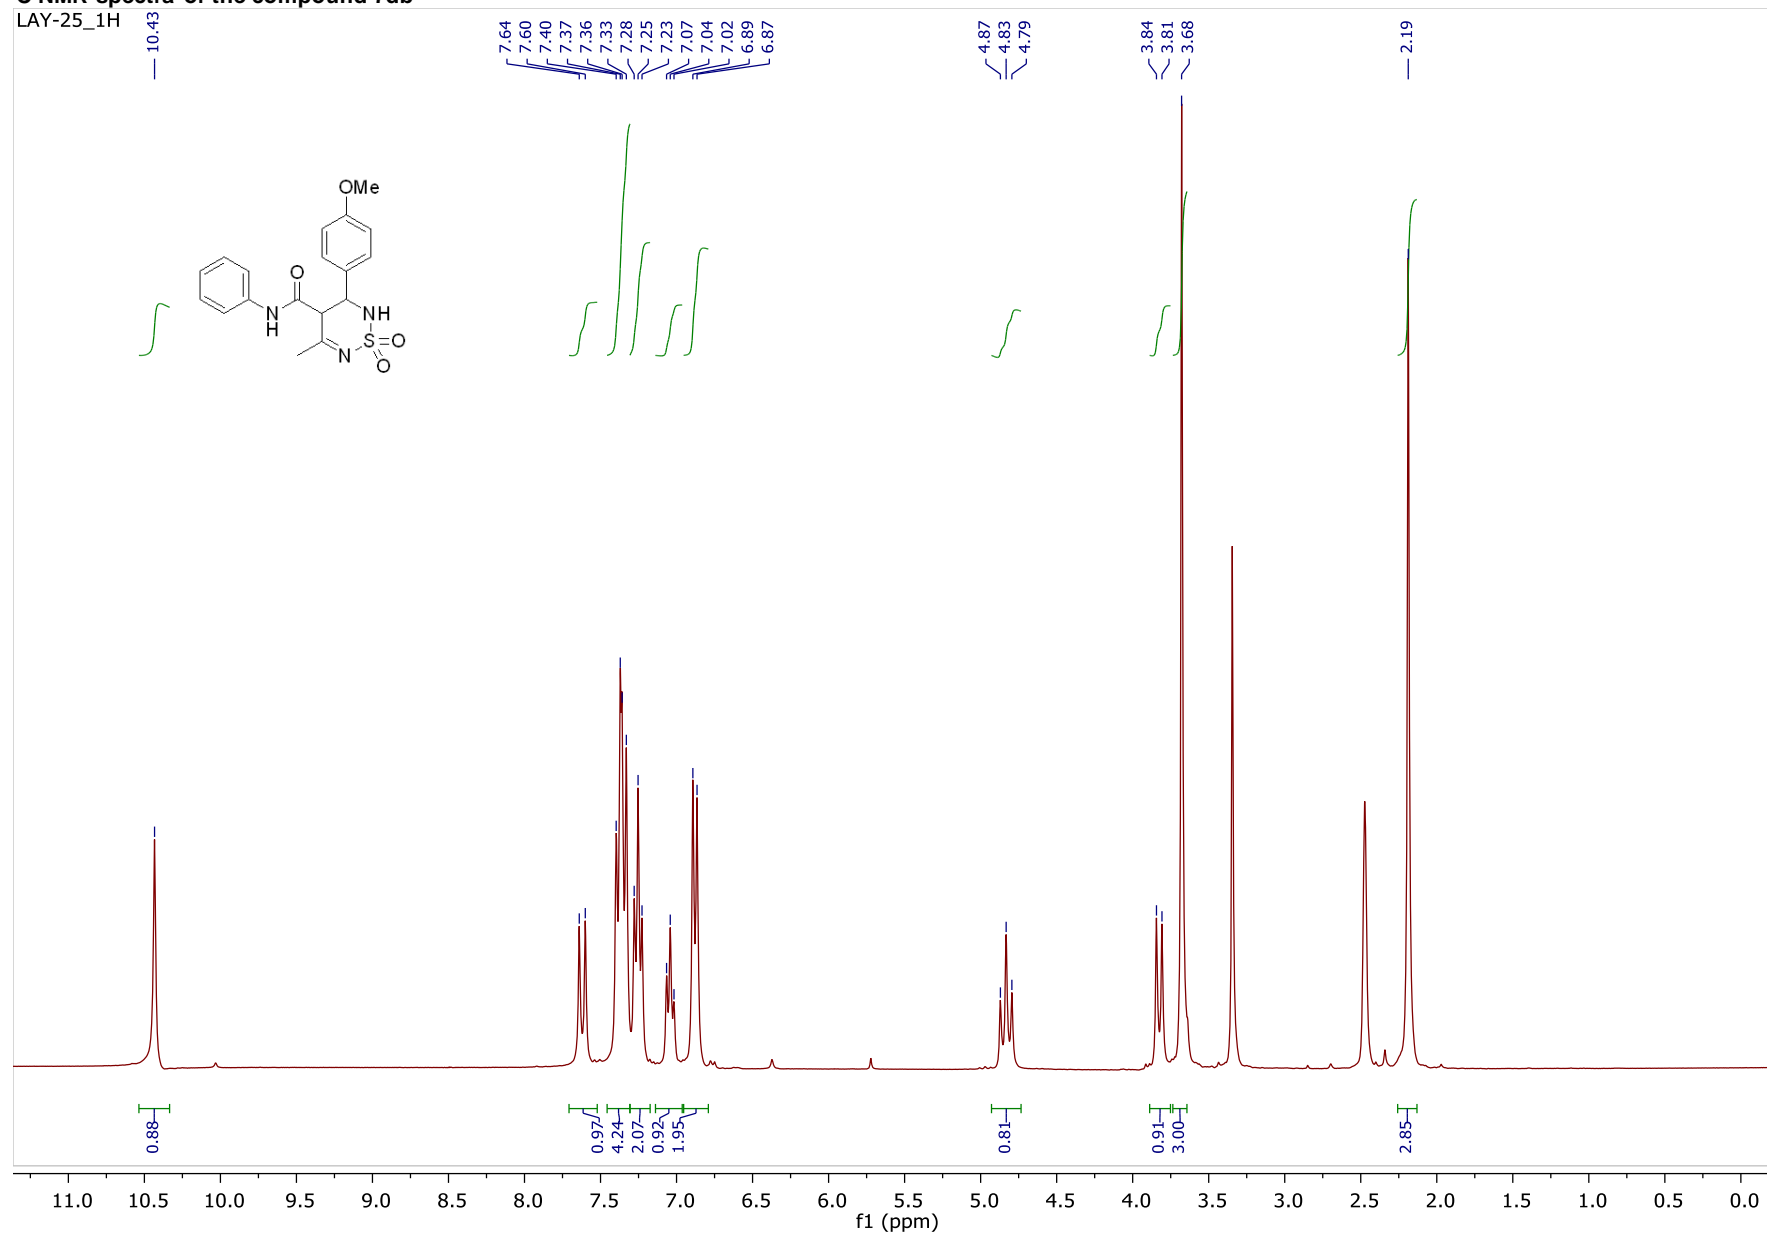

# SUPPORTING INFORMATION

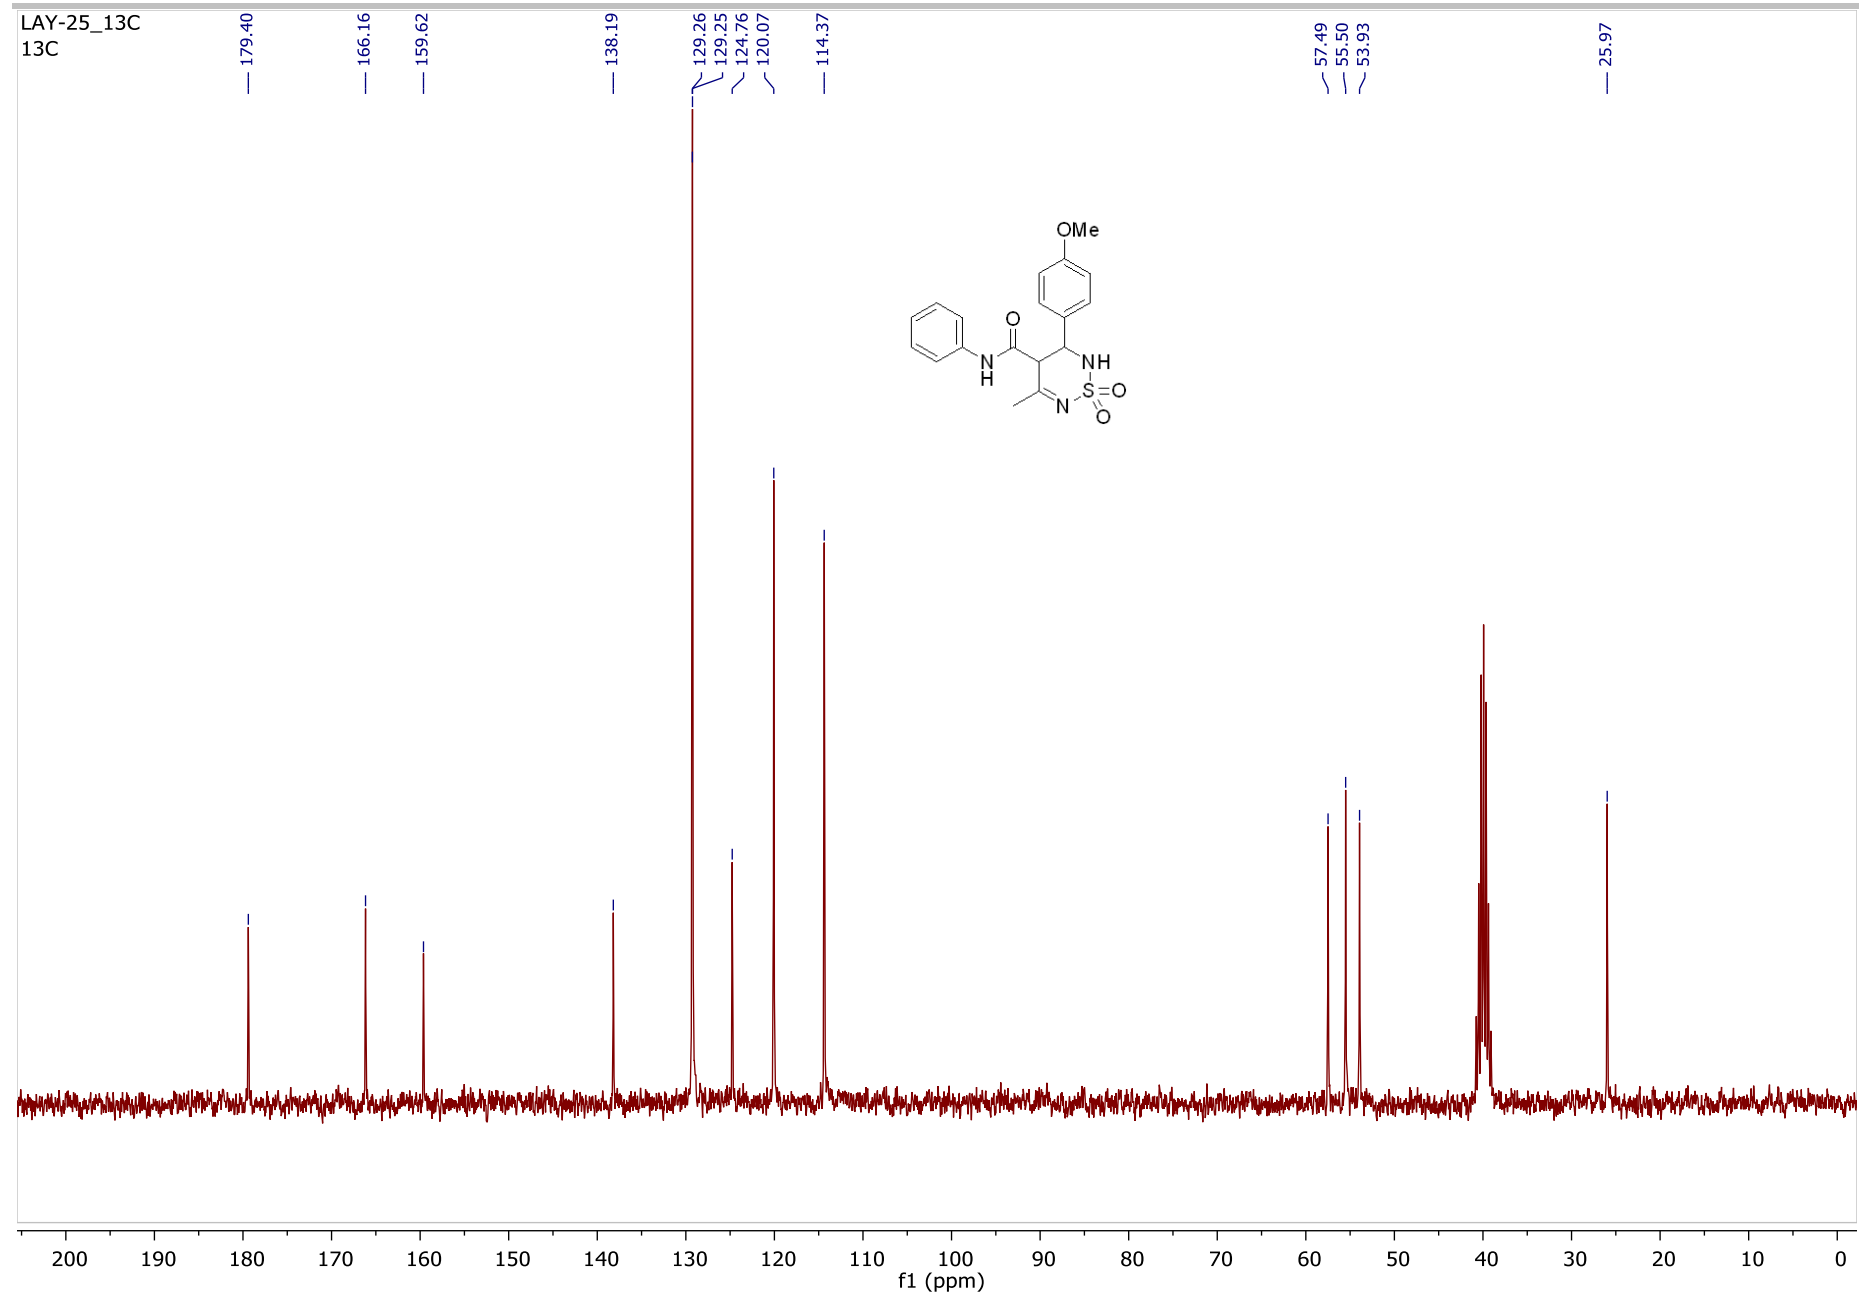

# SUPPORTING INFORMATION

## <sup>1</sup>H and <sup>13</sup>C NMR spectra of the compound 7eb

van-lay241.1.fid

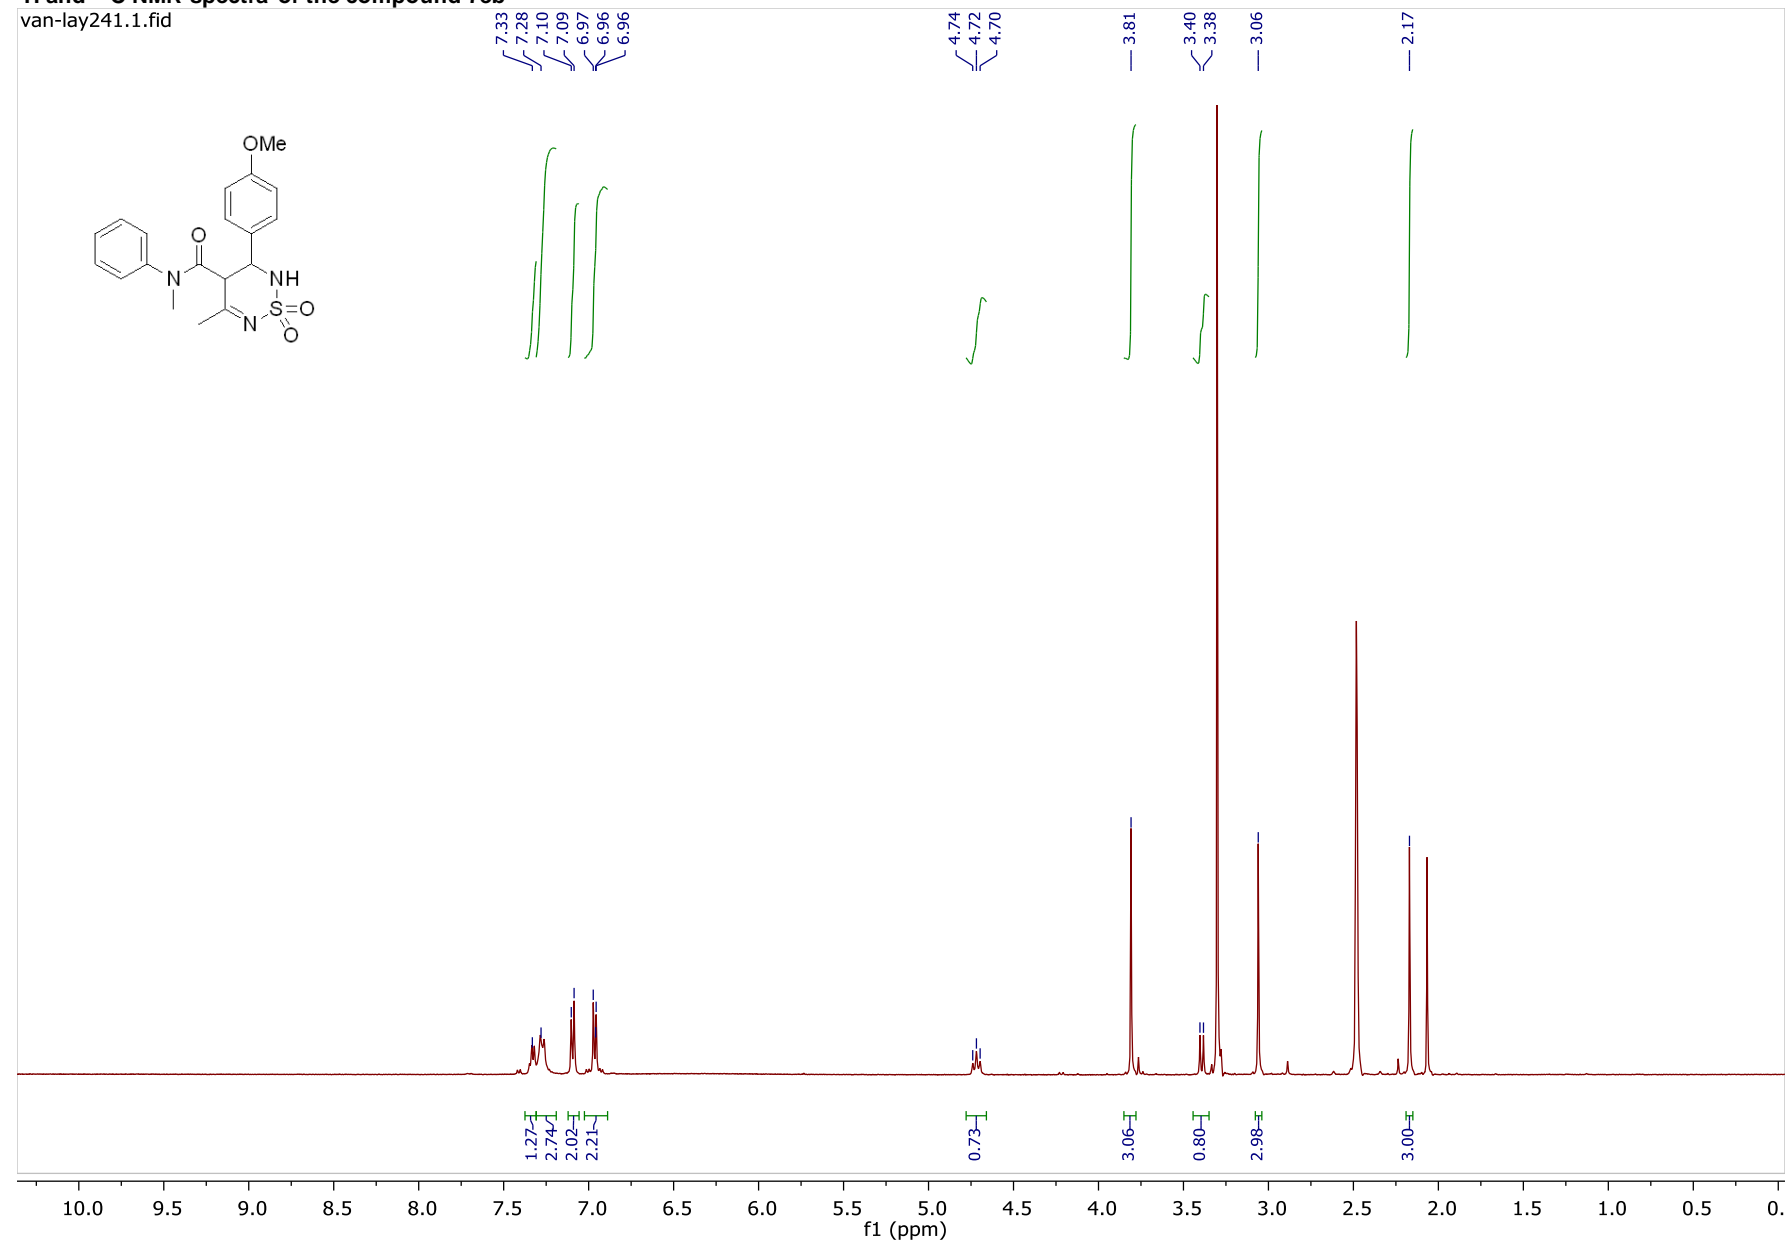

# SUPPORTING INFORMATION

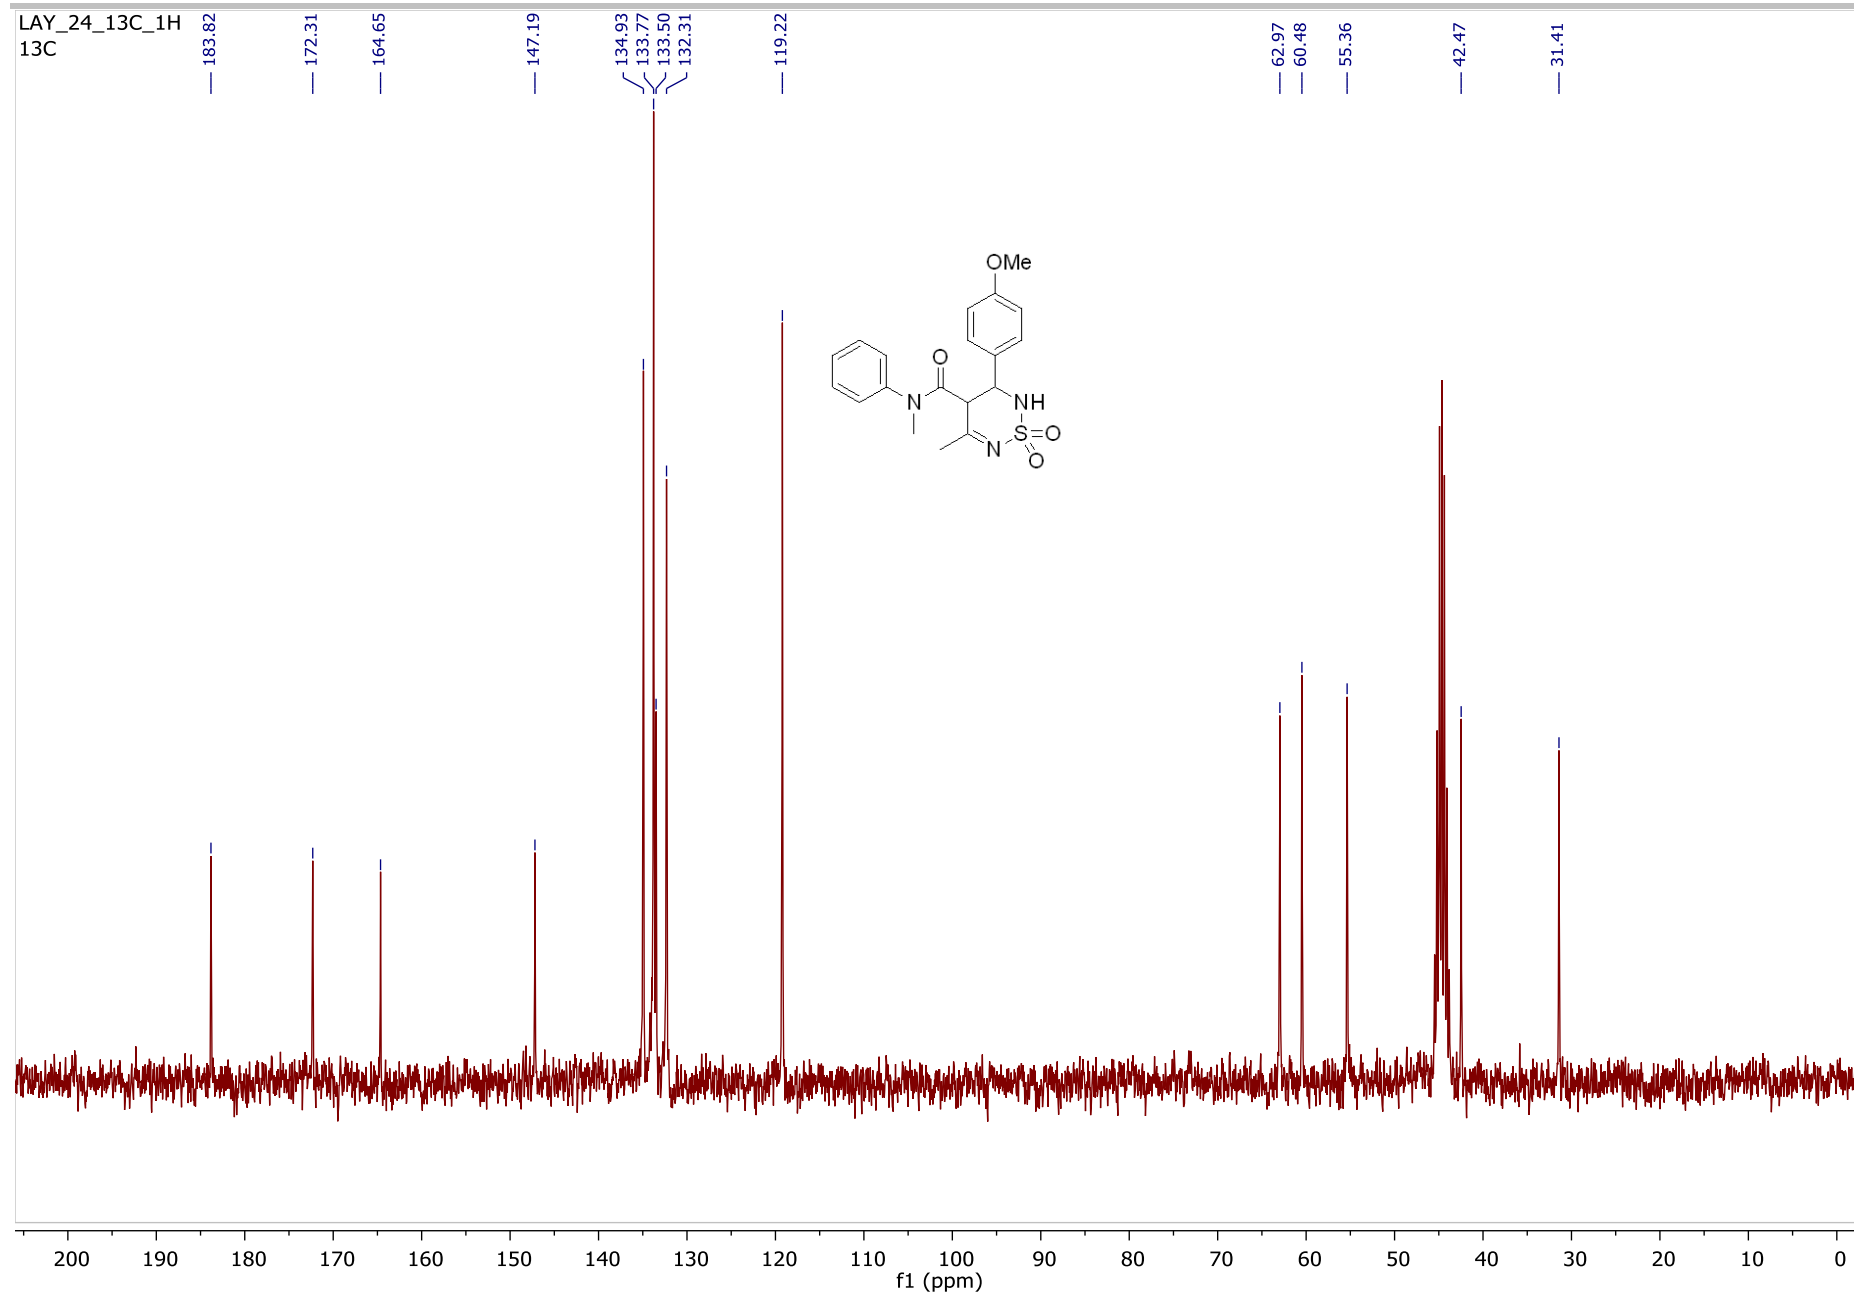



# SUPPORTING INFORMATION

## <sup>1</sup>H and <sup>13</sup>C NMR spectra of the compound 7bc

van-lay195

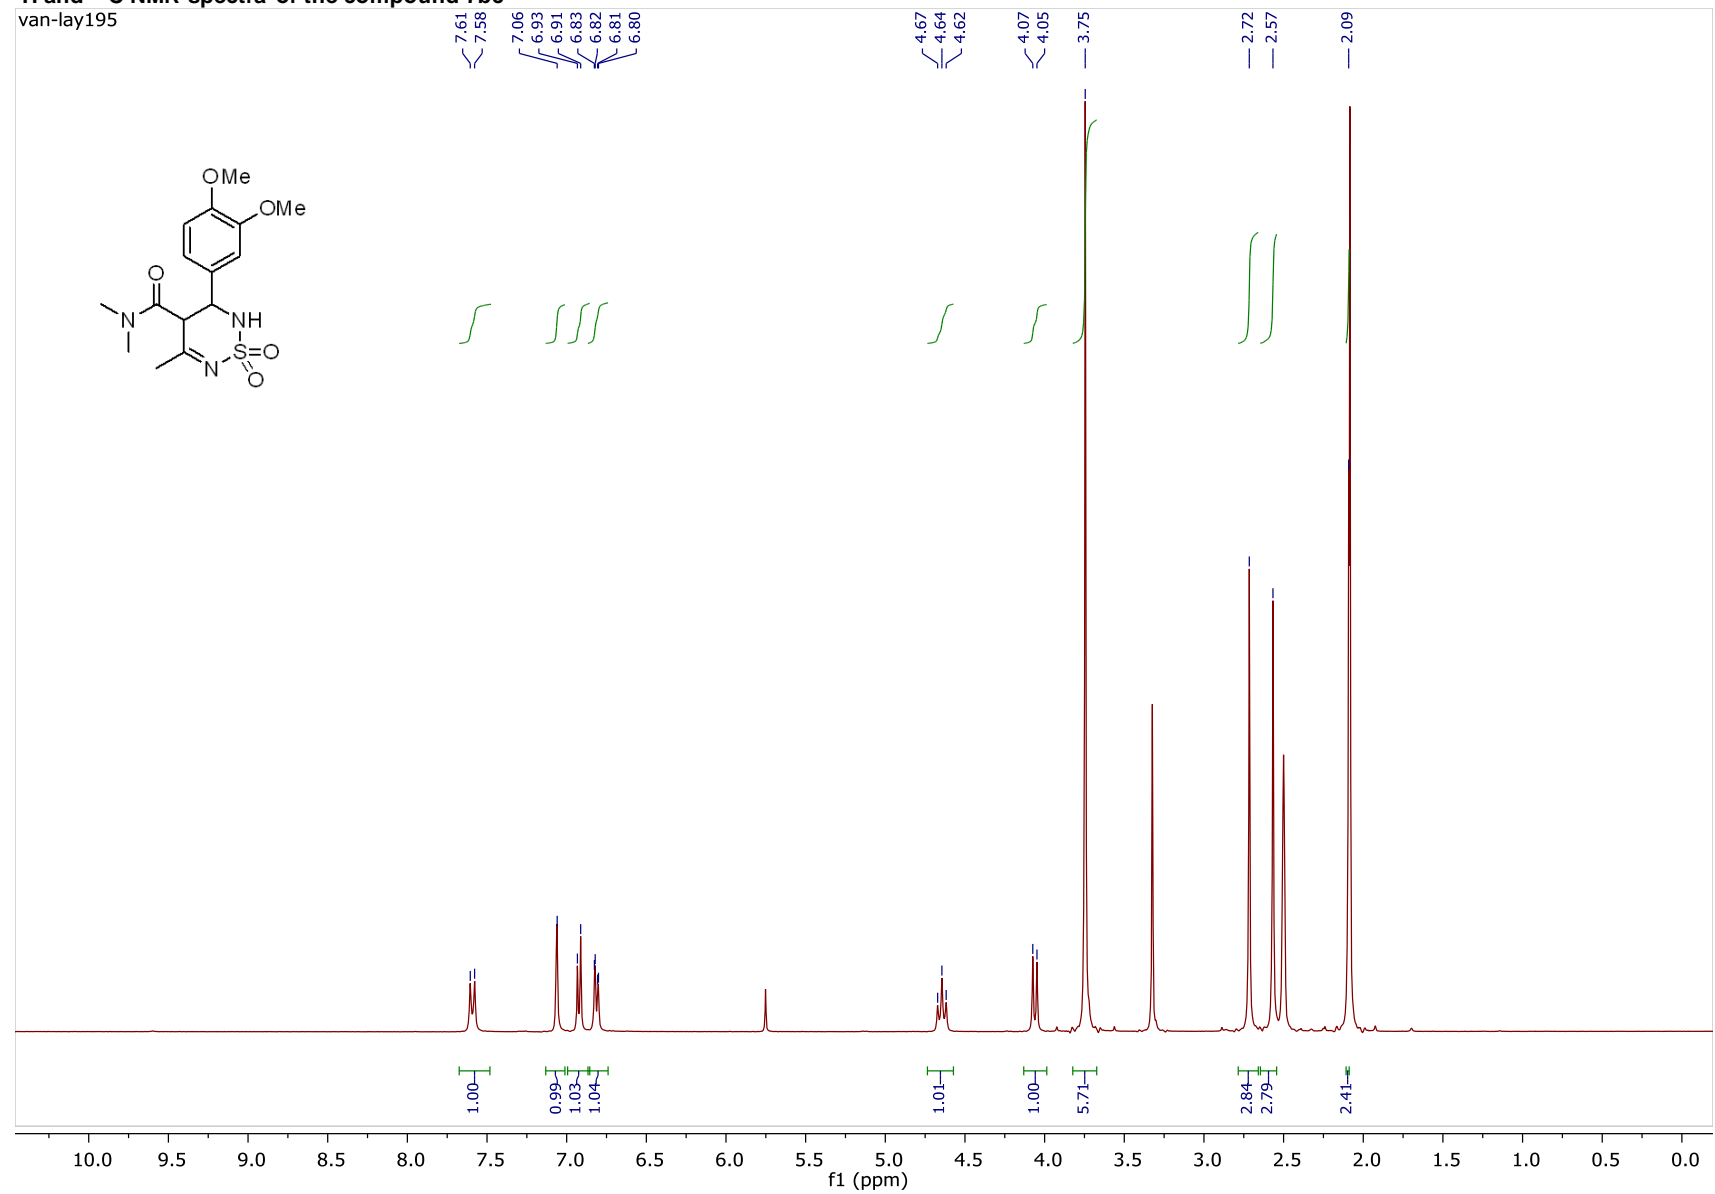

# SUPPORTING INFORMATION

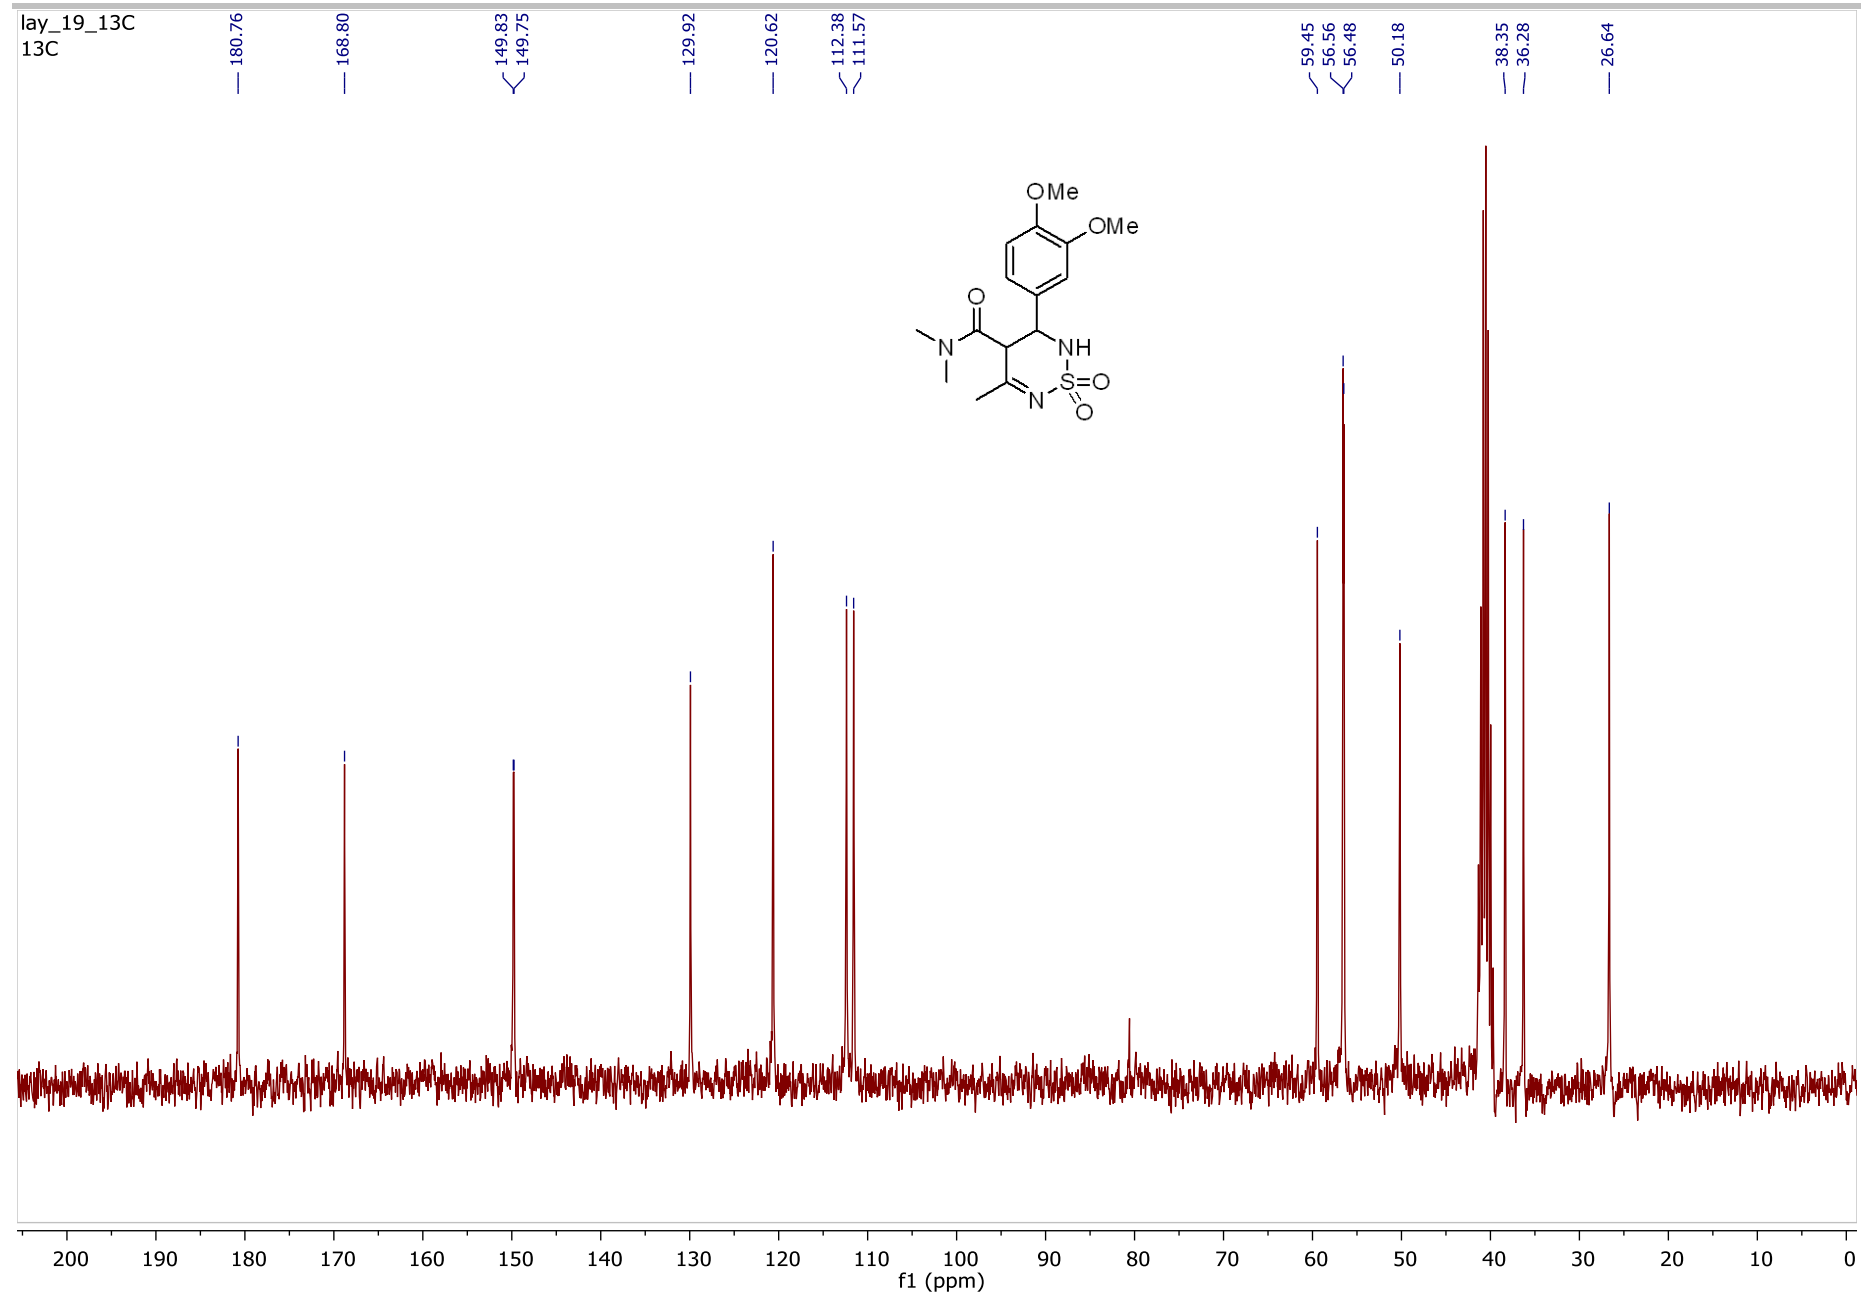

# SUPPORTING INFORMATION

<sup>1</sup>H and <sup>13</sup>C NMR spectra of the compound 7cc  
lay\_20\_1H

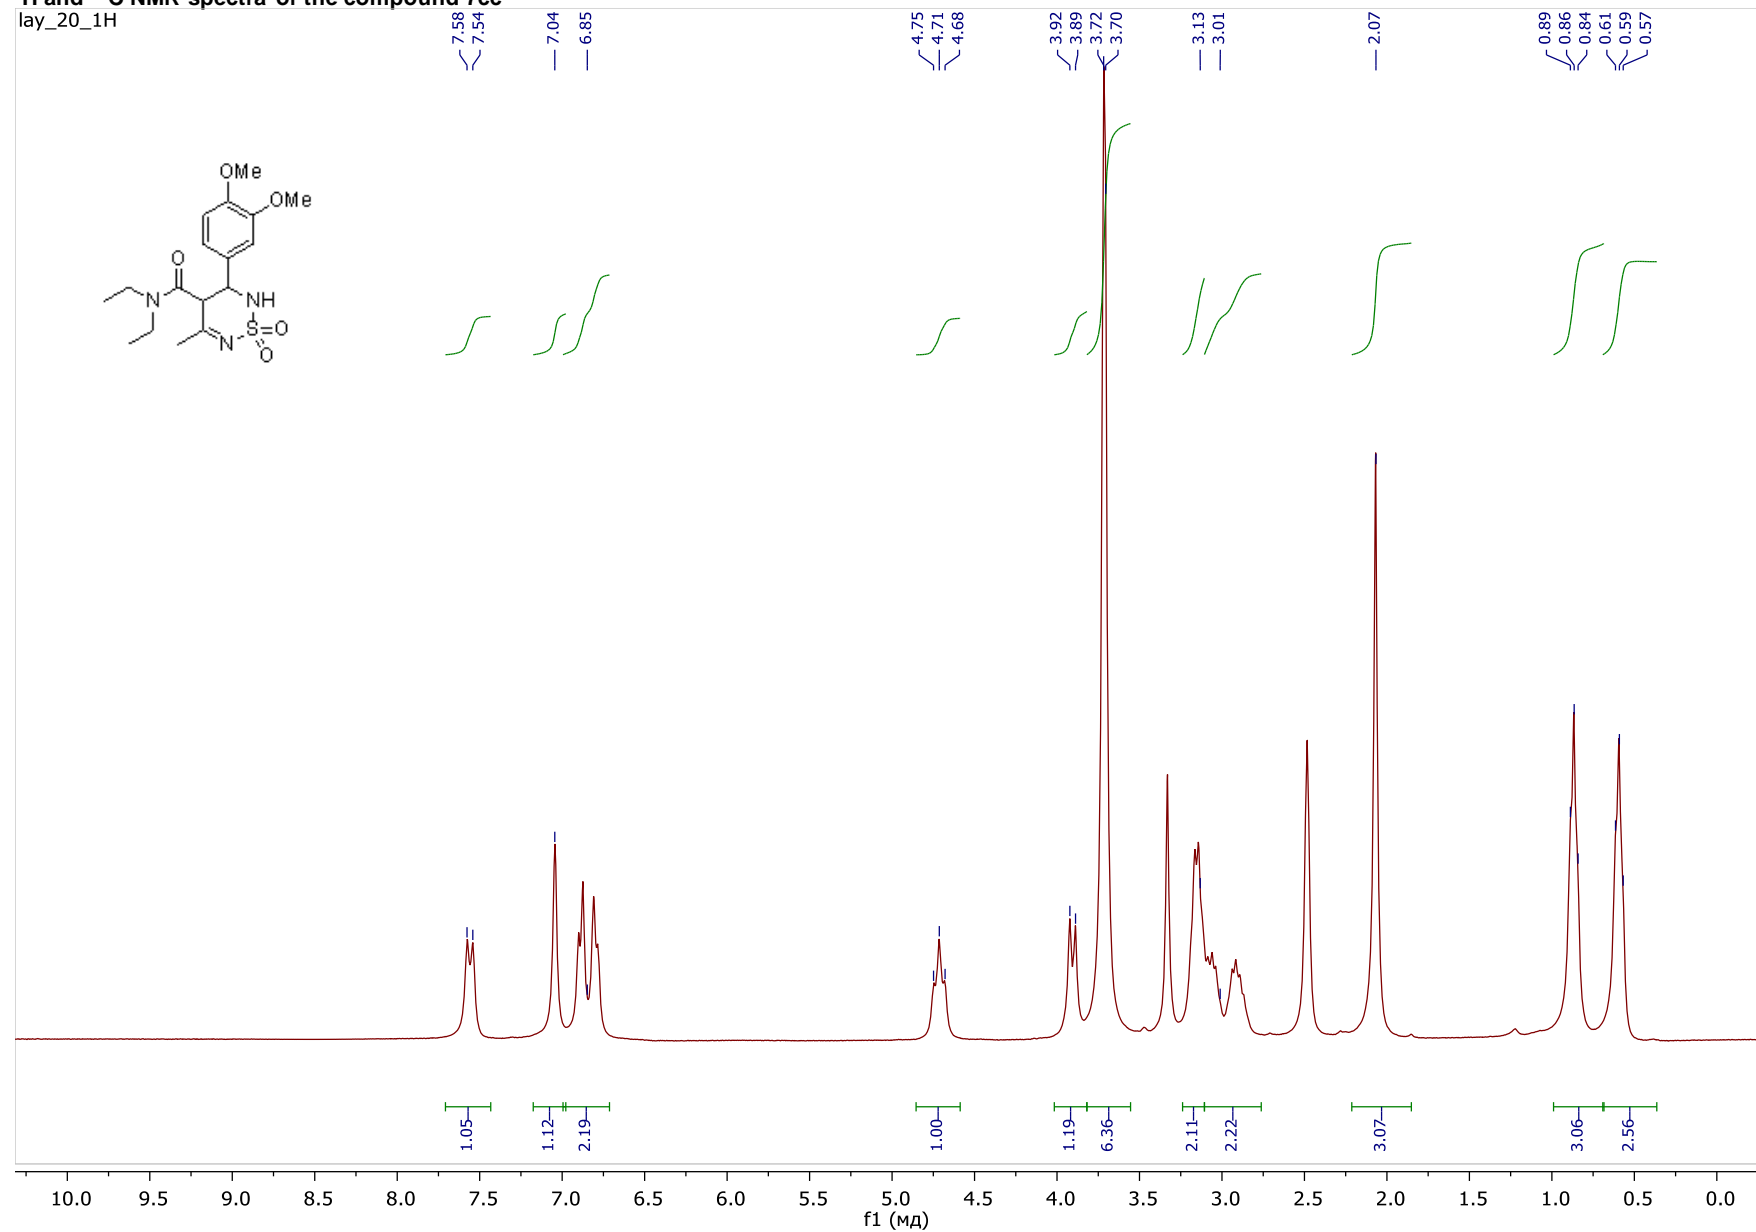

# SUPPORTING INFORMATION

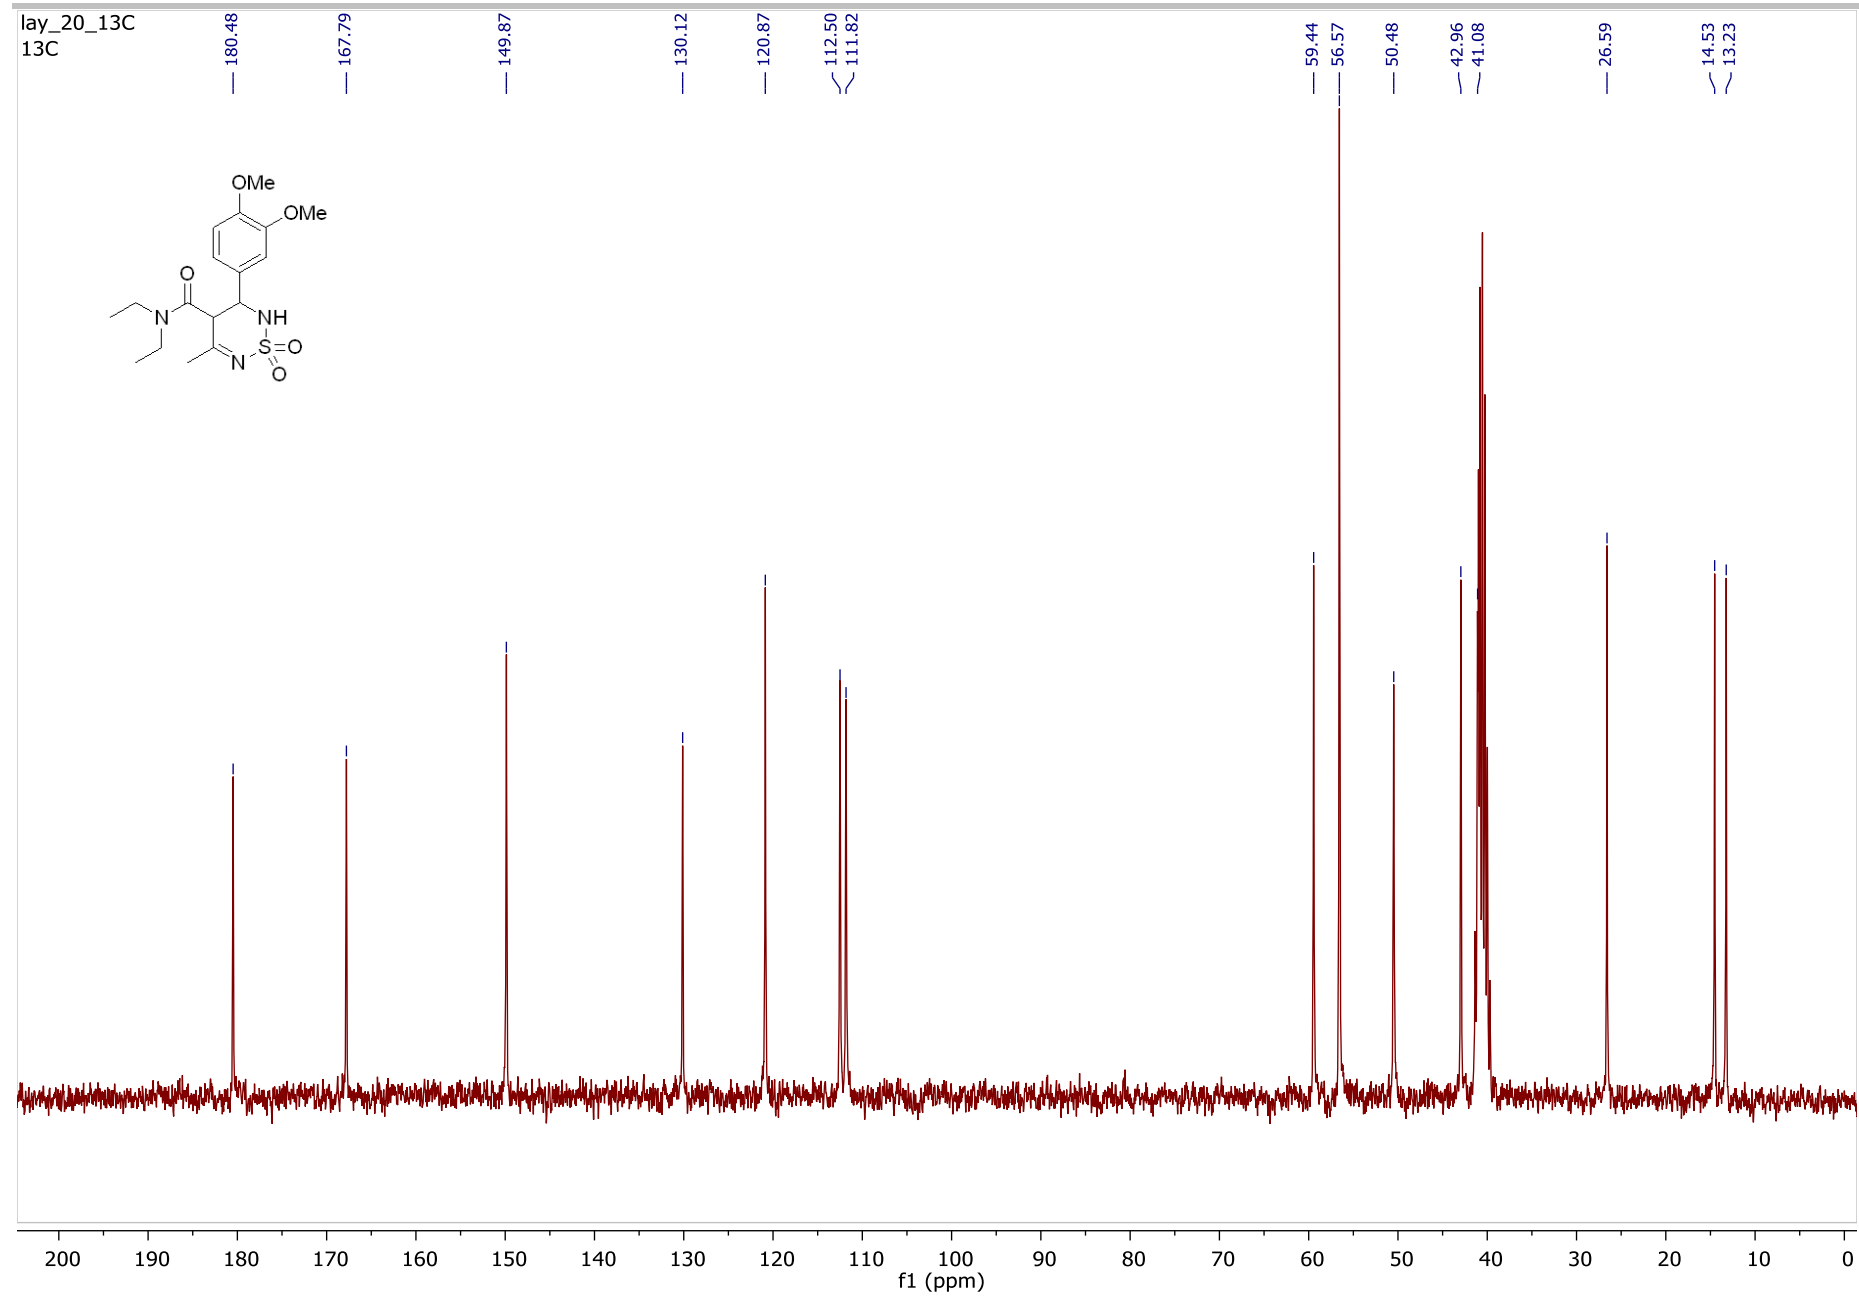

# SUPPORTING INFORMATION

<sup>1</sup>H and <sup>13</sup>C NMR spectra of the compound 7bd

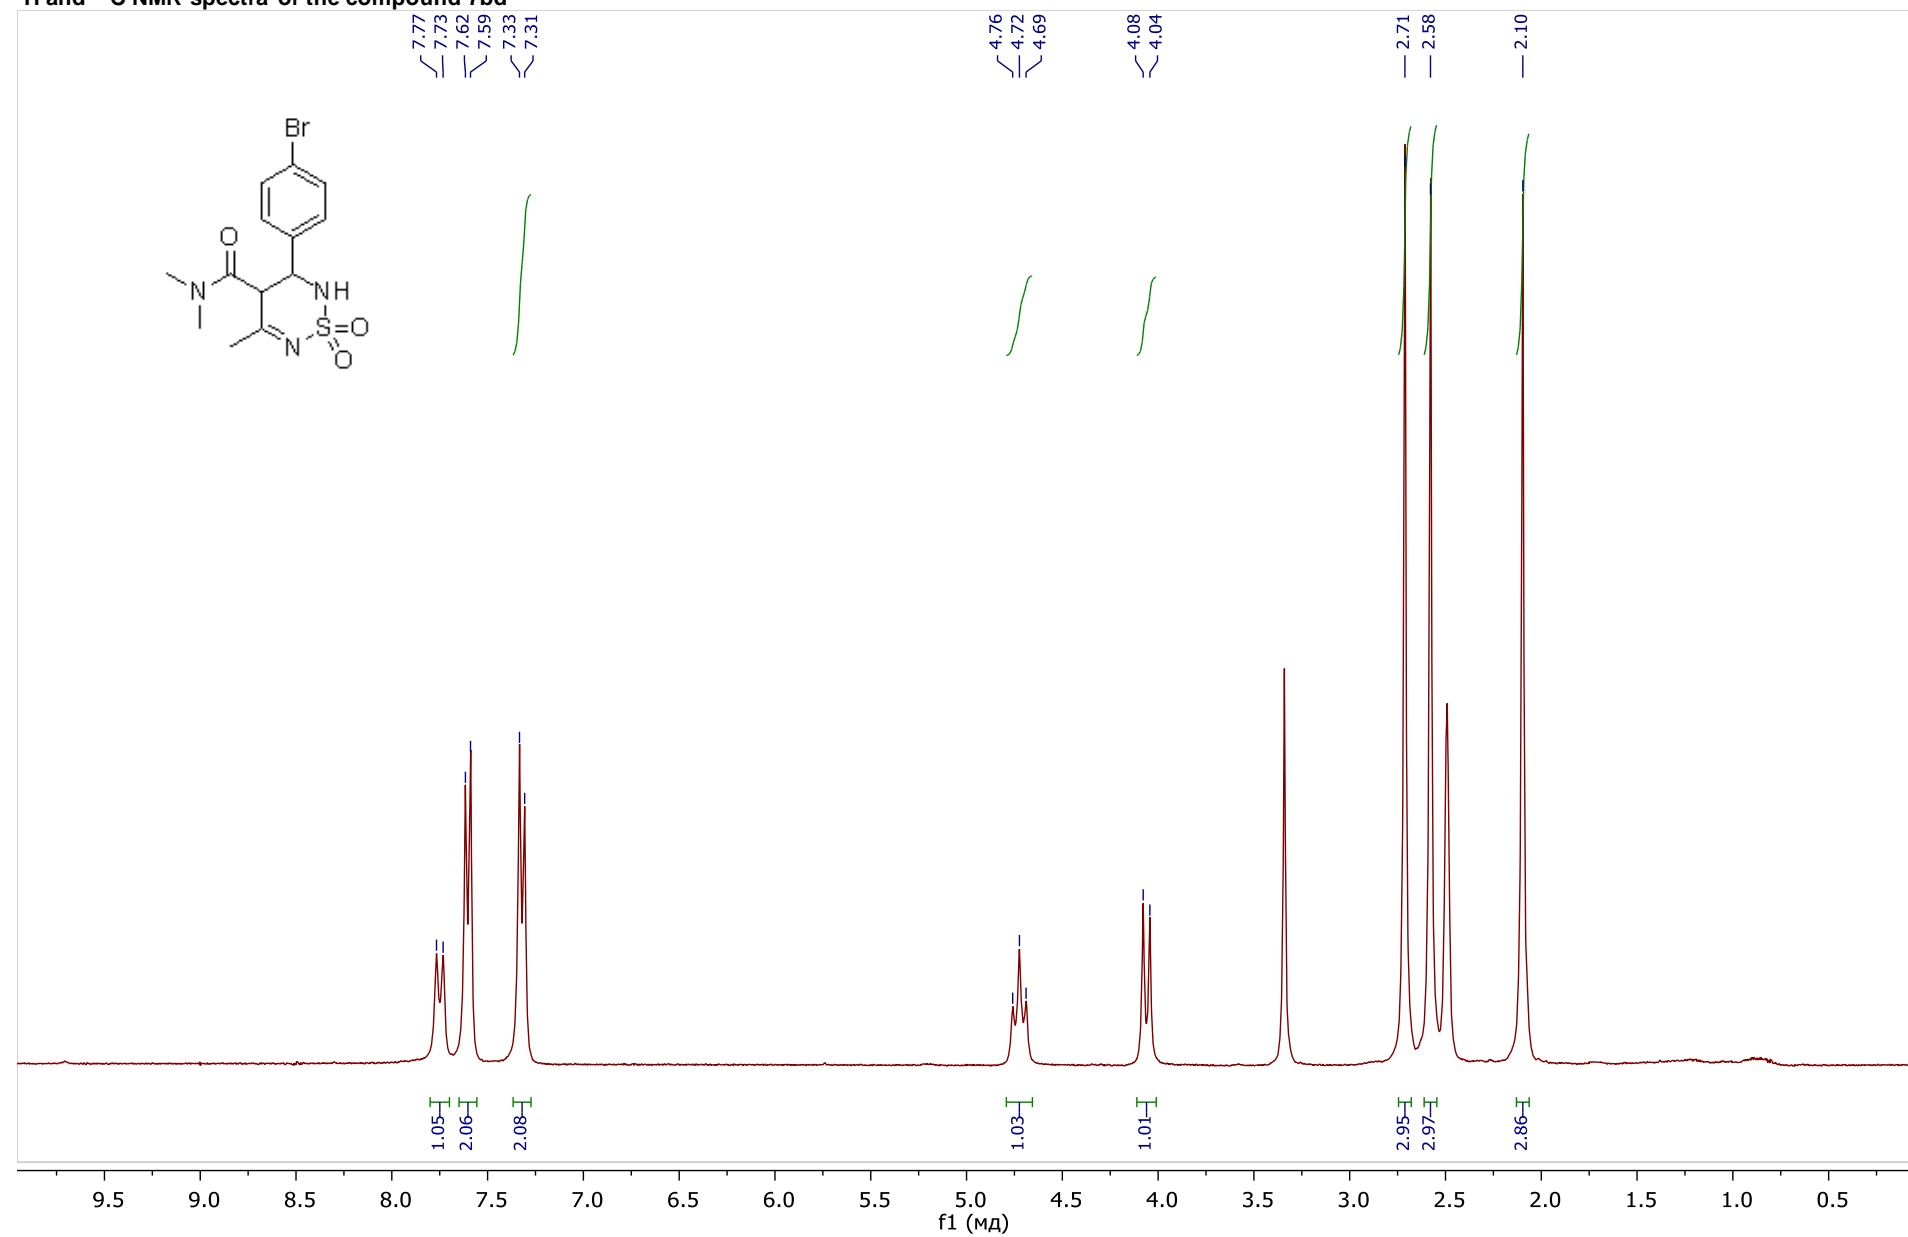

# SUPPORTING INFORMATION

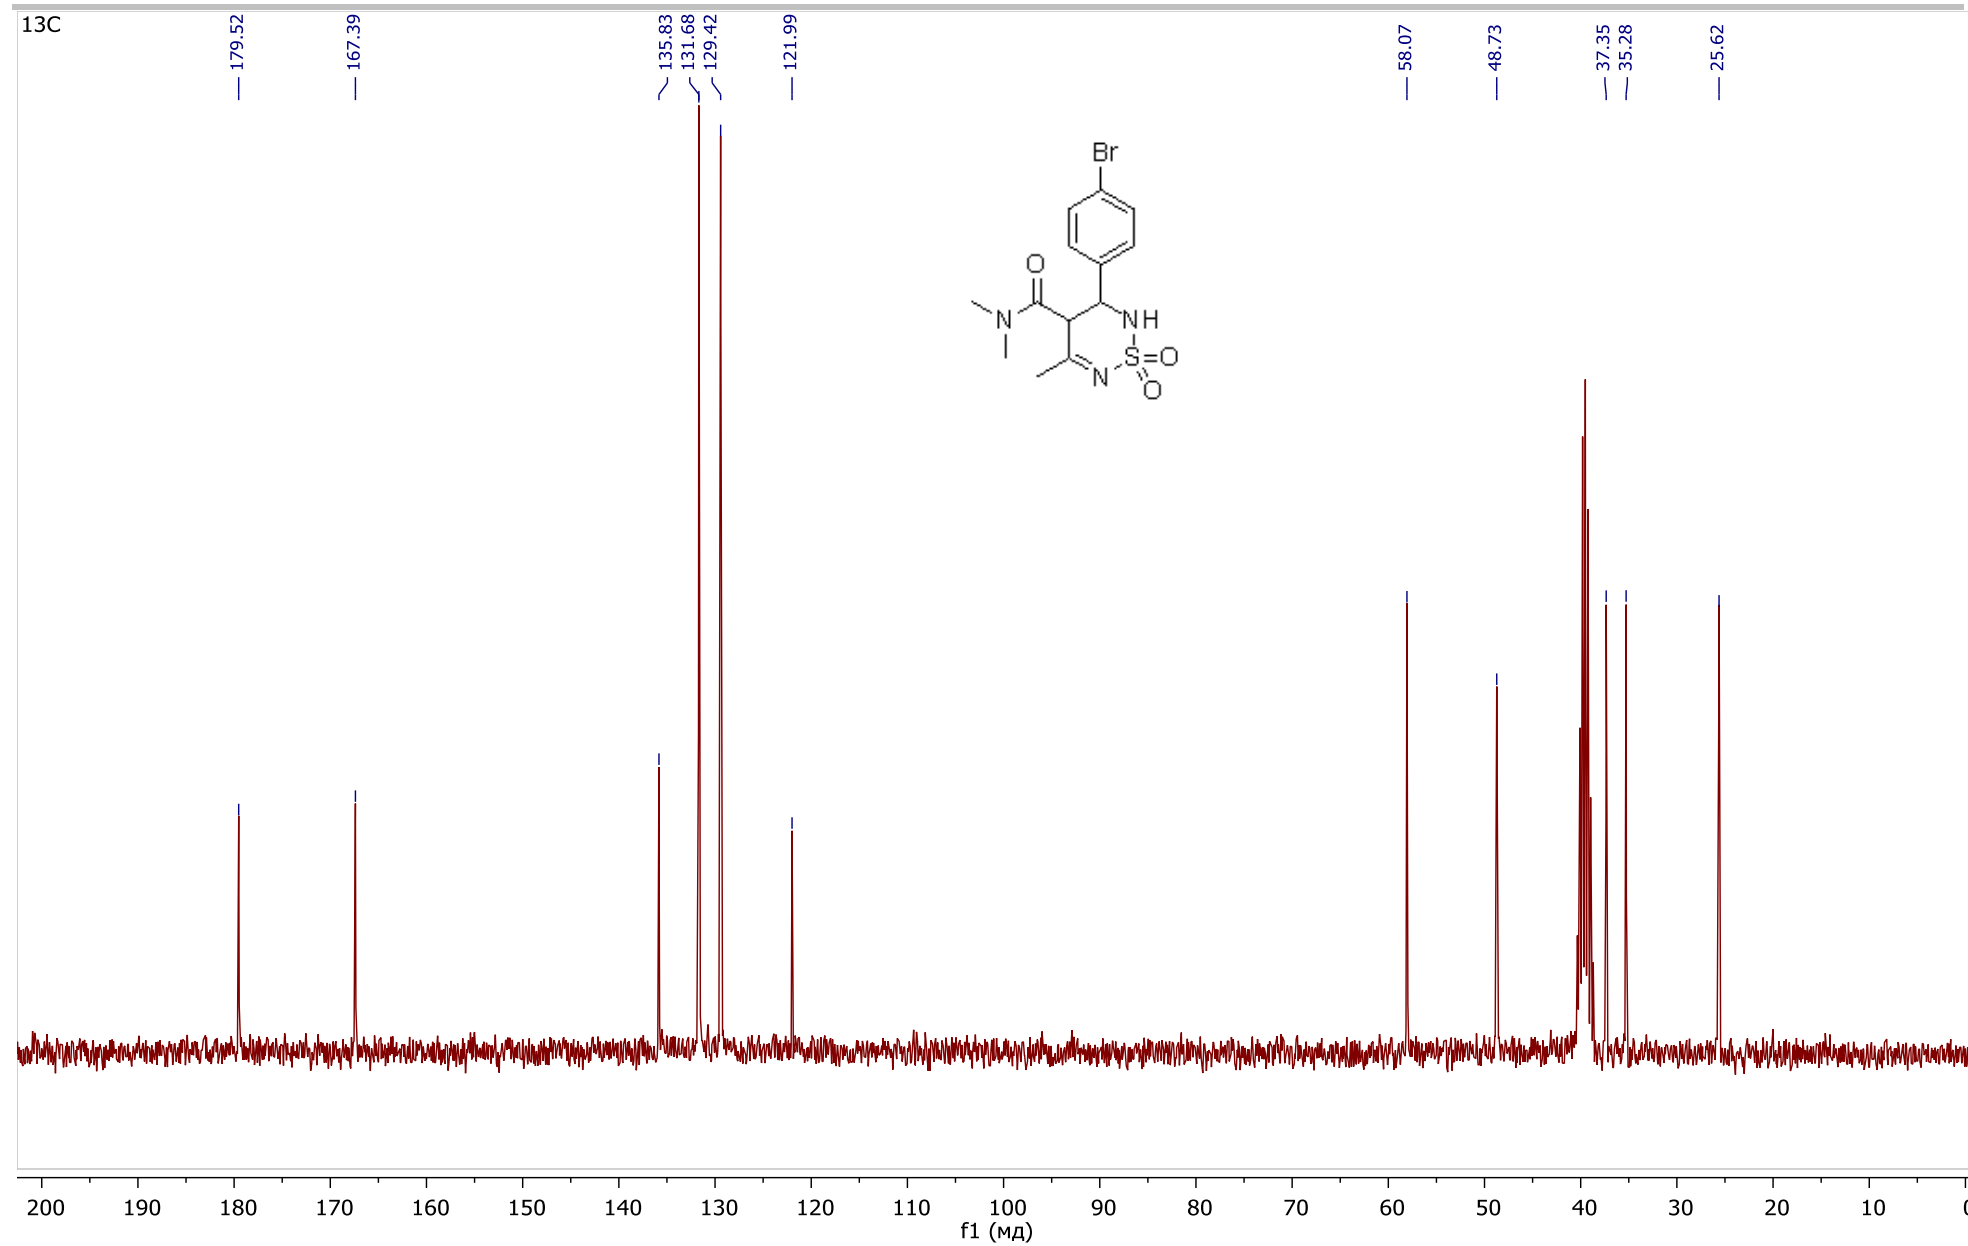

# SUPPORTING INFORMATION

## <sup>1</sup>H and <sup>13</sup>C NMR of the compound 7cd

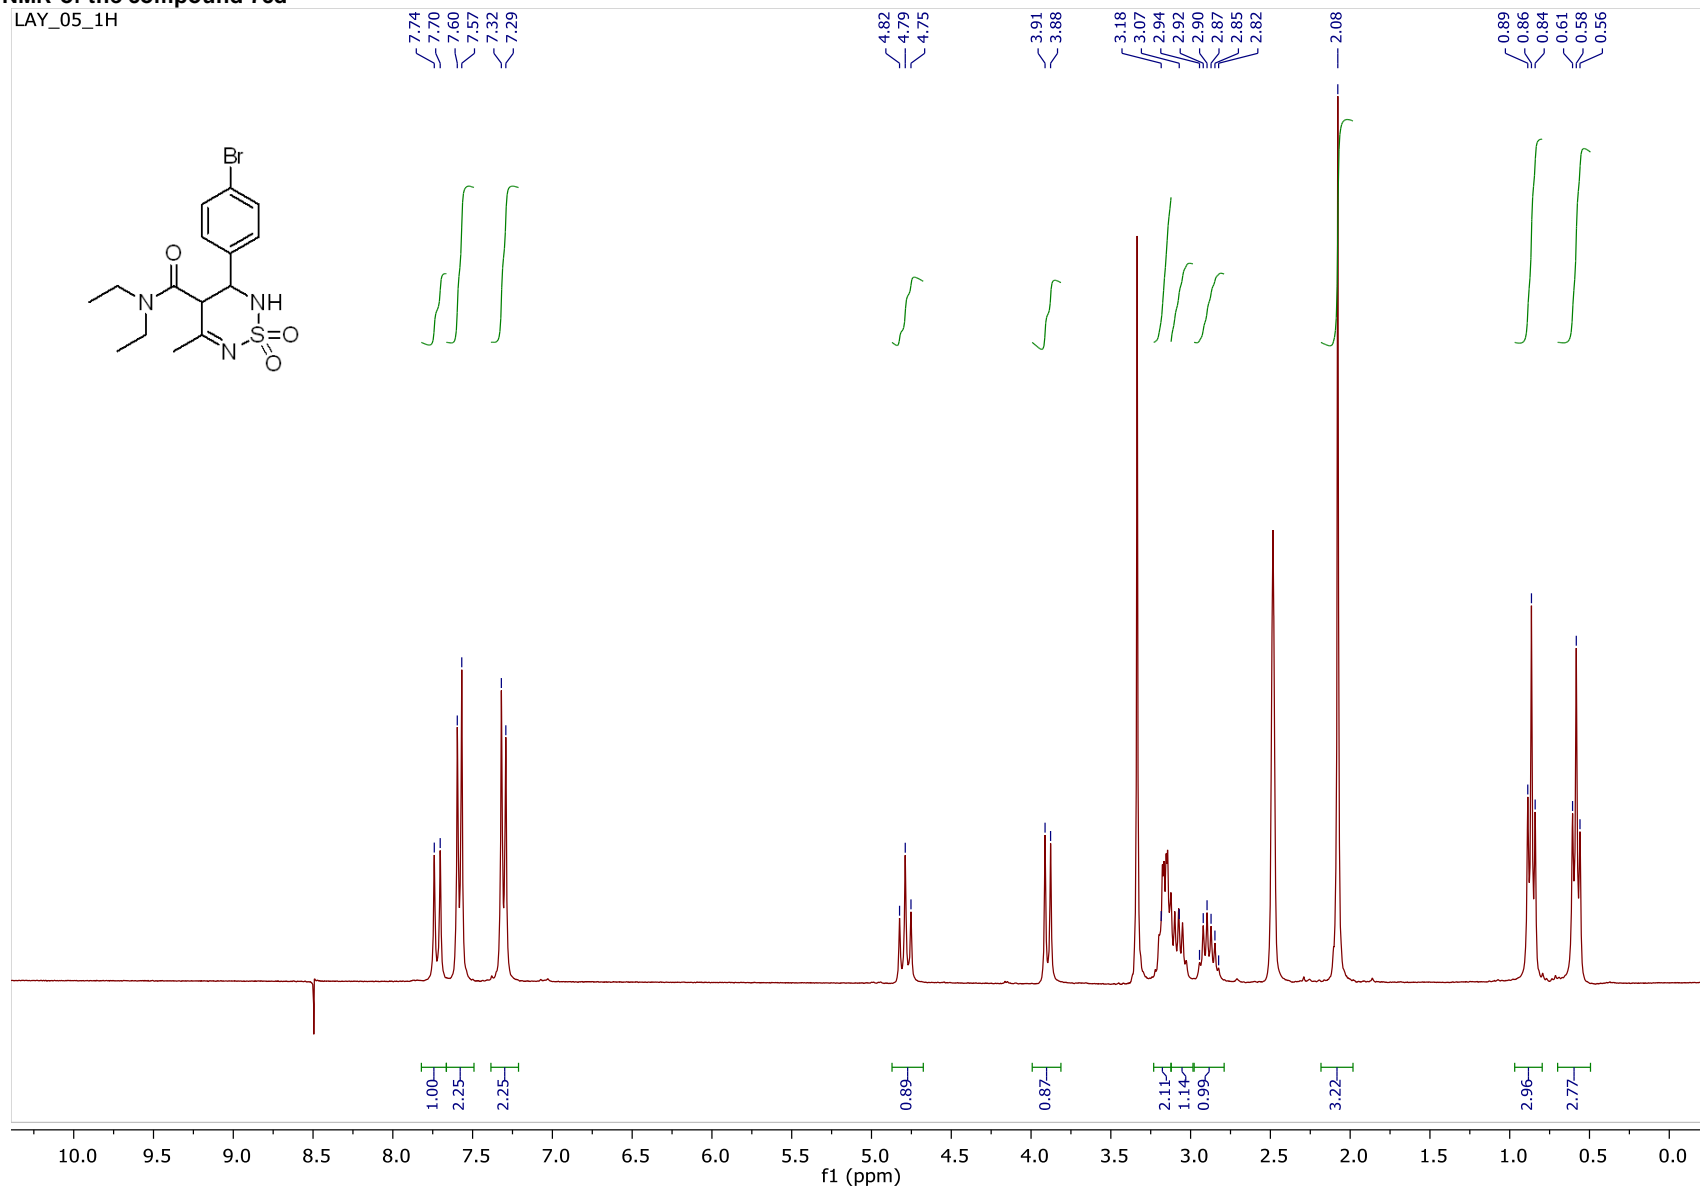

# SUPPORTING INFORMATION

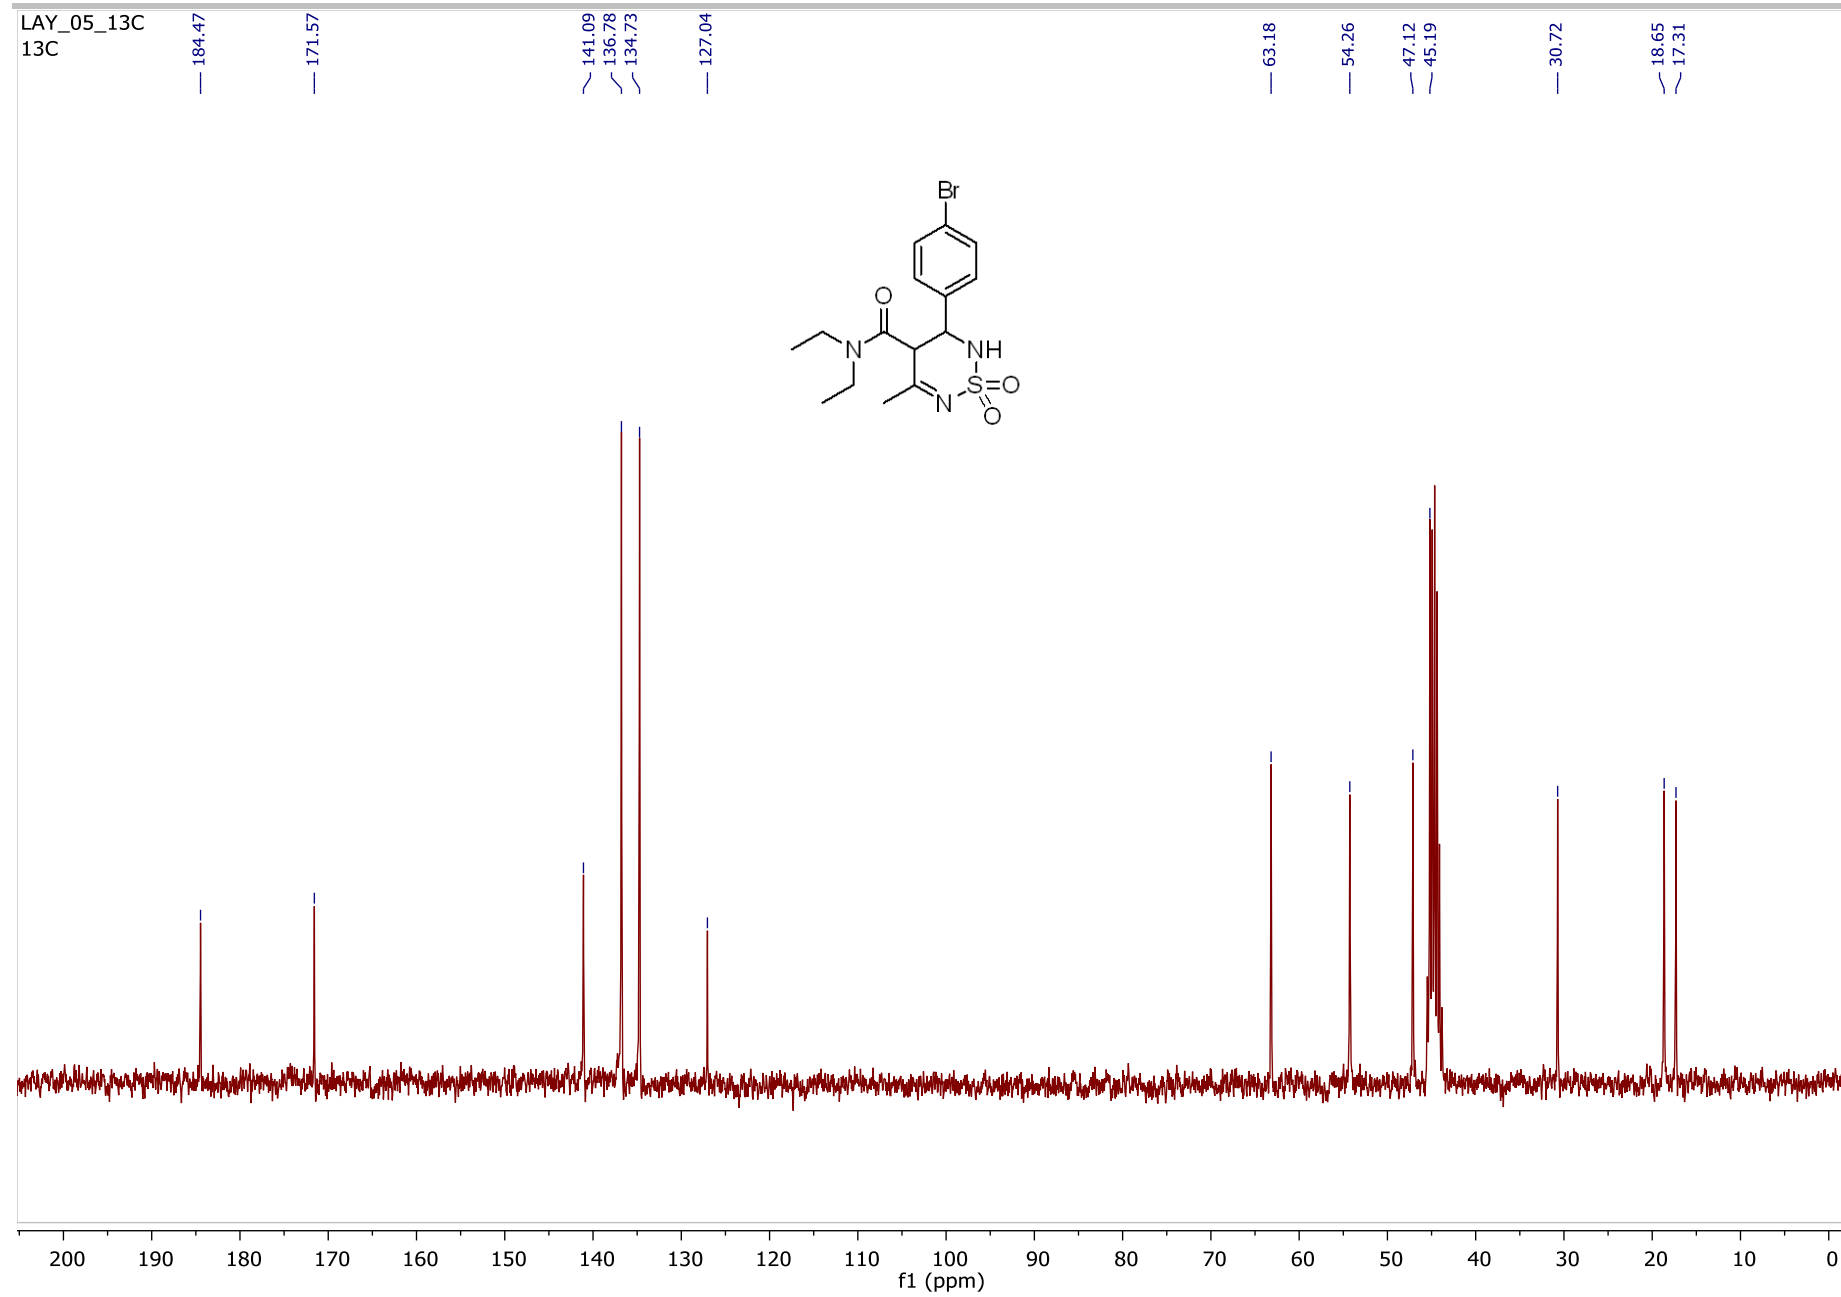



# SUPPORTING INFORMATION

## <sup>1</sup>H and <sup>13</sup>C NMR spectra of the compound 7ed

LAY-06\_1H

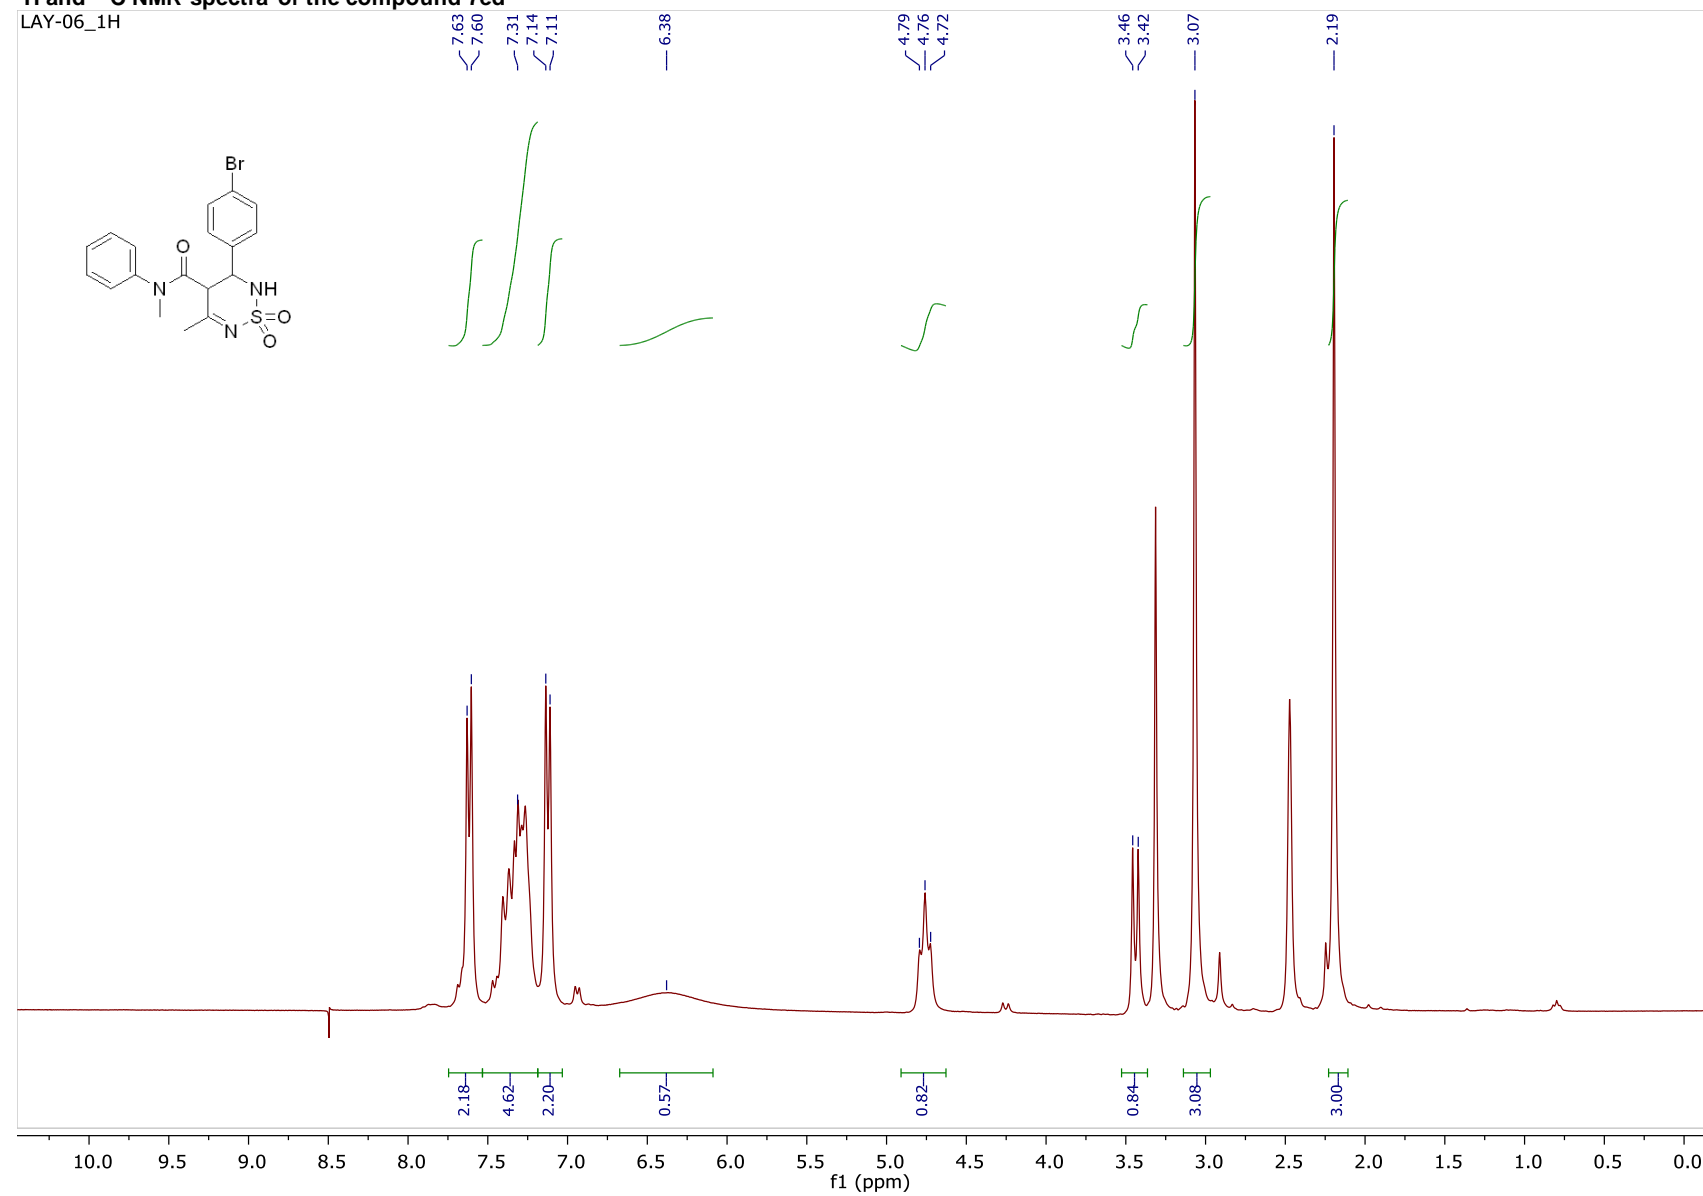

# SUPPORTING INFORMATION

LAY-06\_13C  
13C

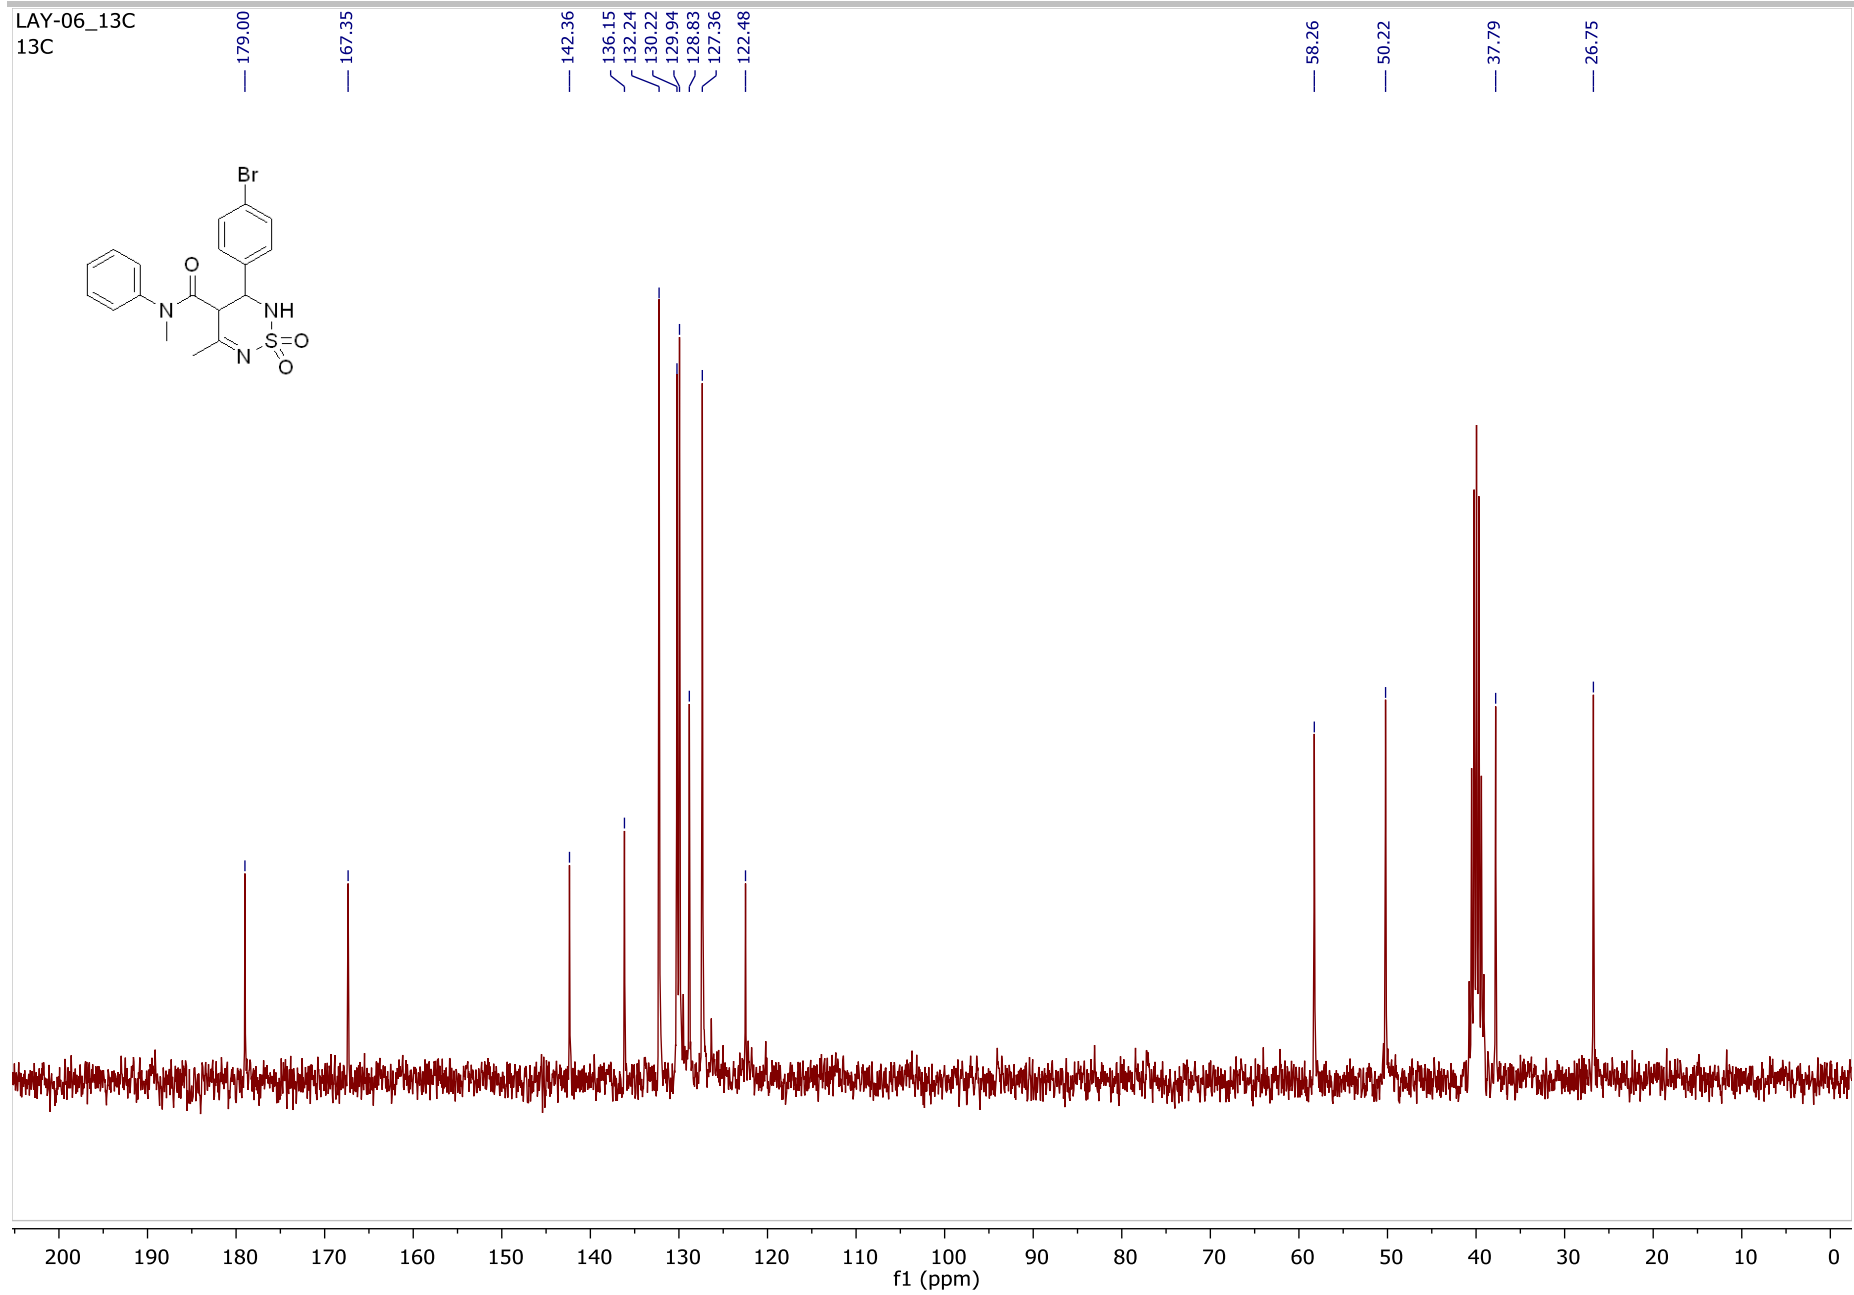

# SUPPORTING INFORMATION

## <sup>1</sup>H NMR spectrum of the compound 7ce

van-lay071.1.fid

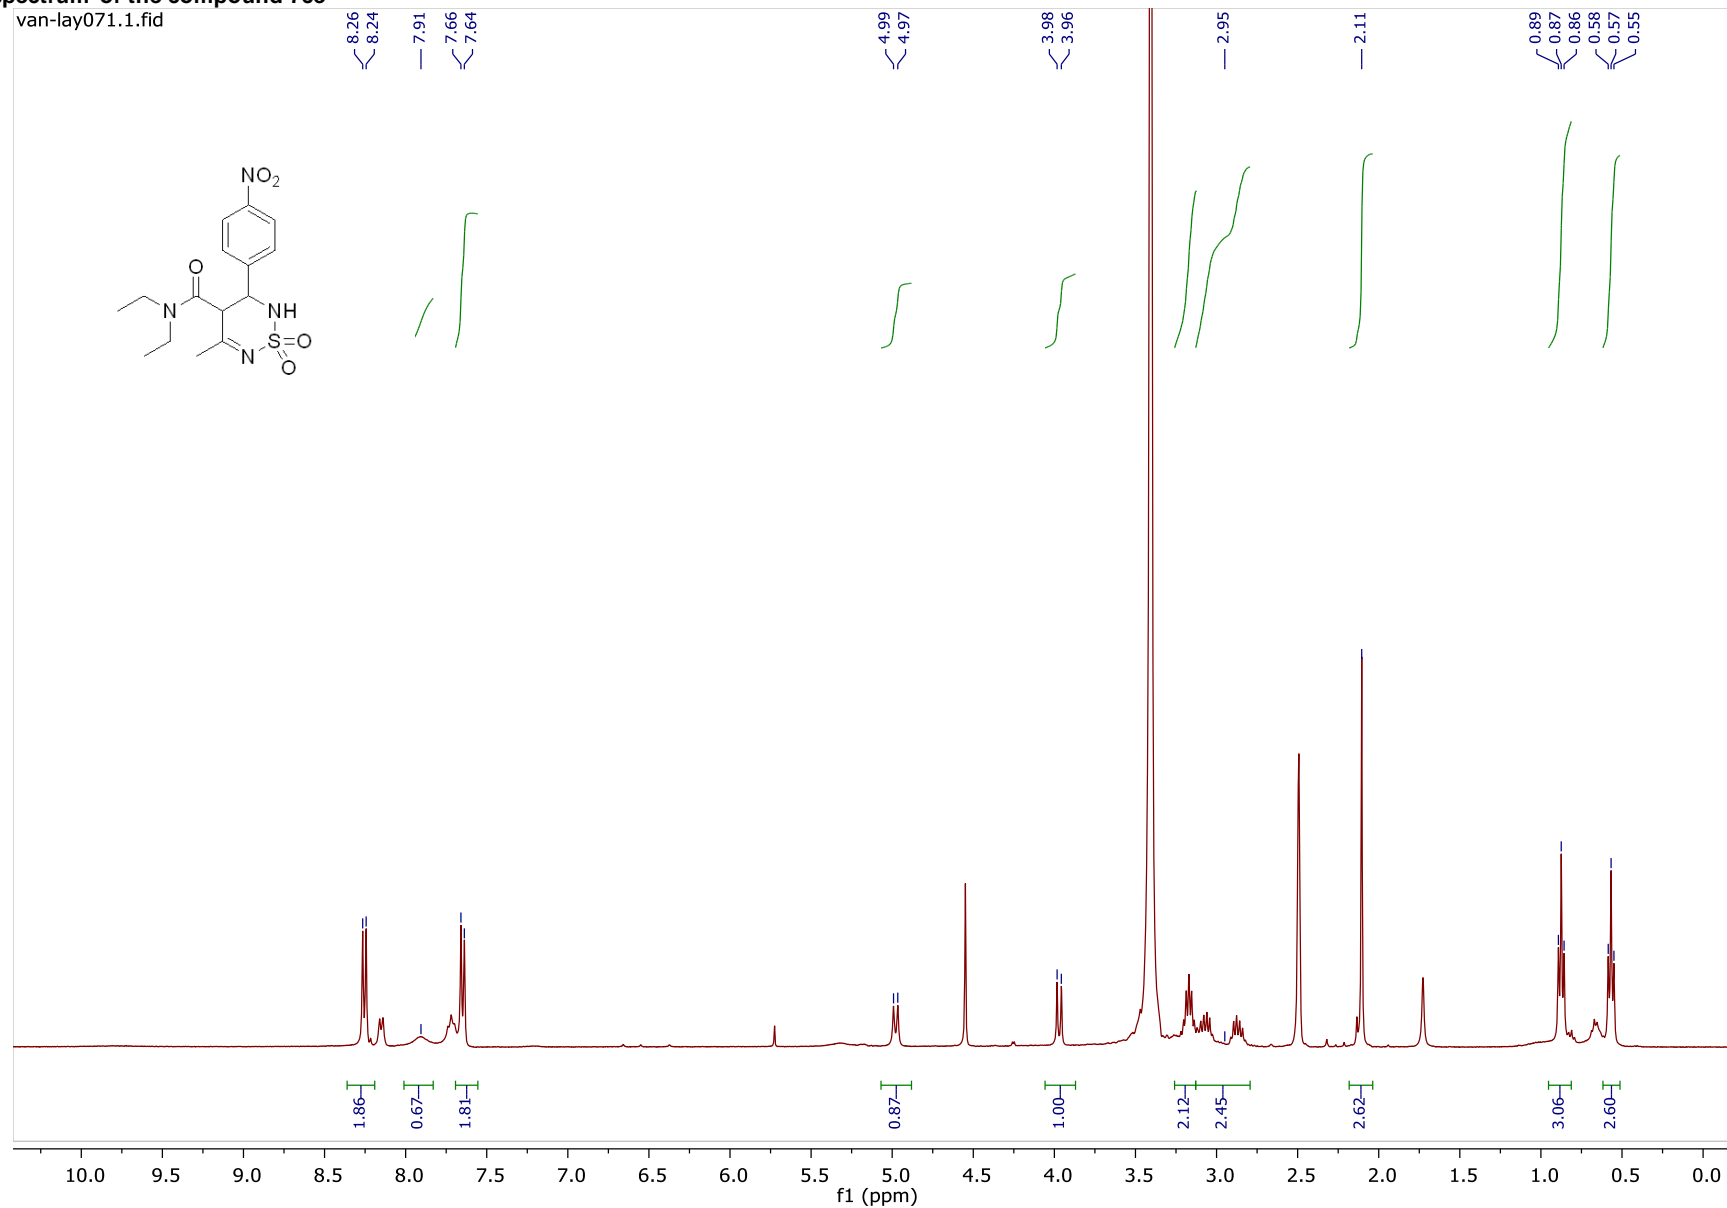

# SUPPORTING INFORMATION

## <sup>1</sup>H and <sup>13</sup>C NMR spectra of the compound 7cf

van-lay313.1.fid

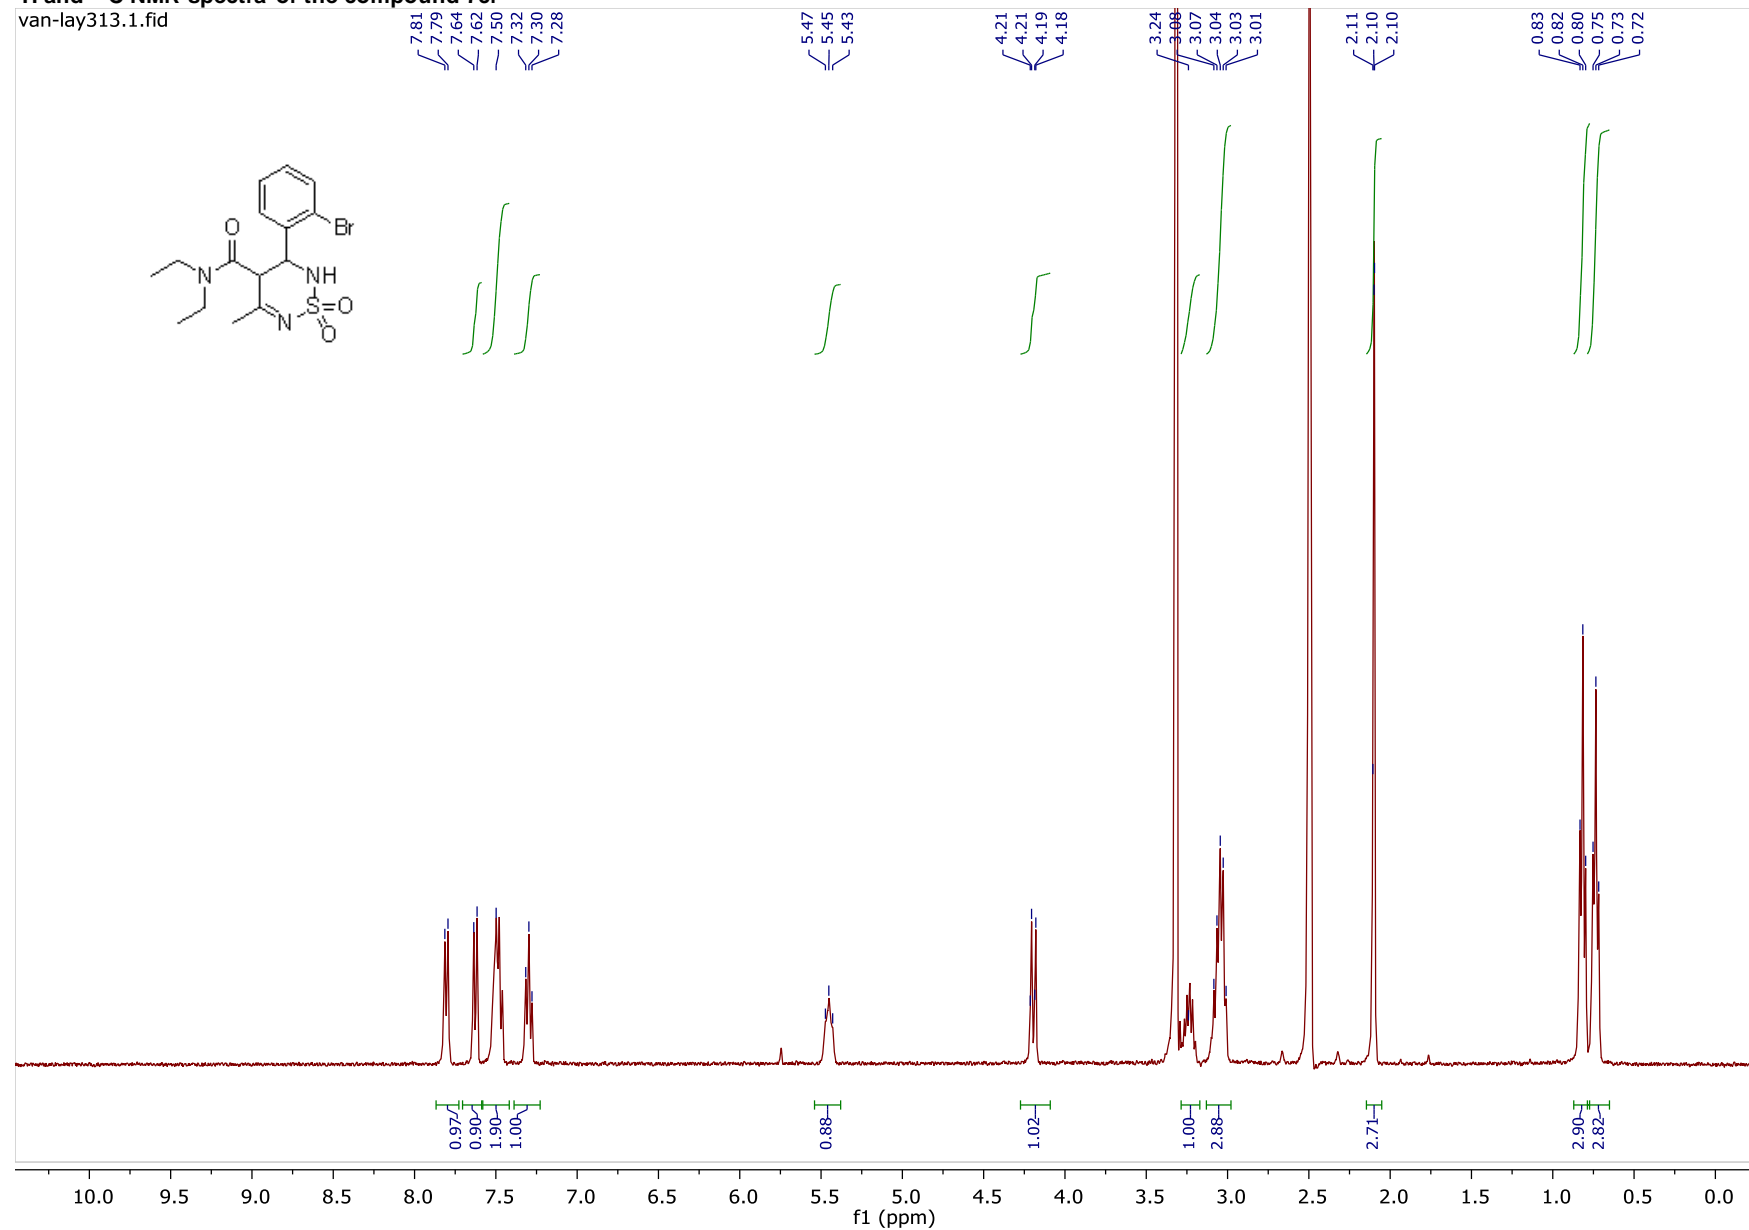

# SUPPORTING INFORMATION

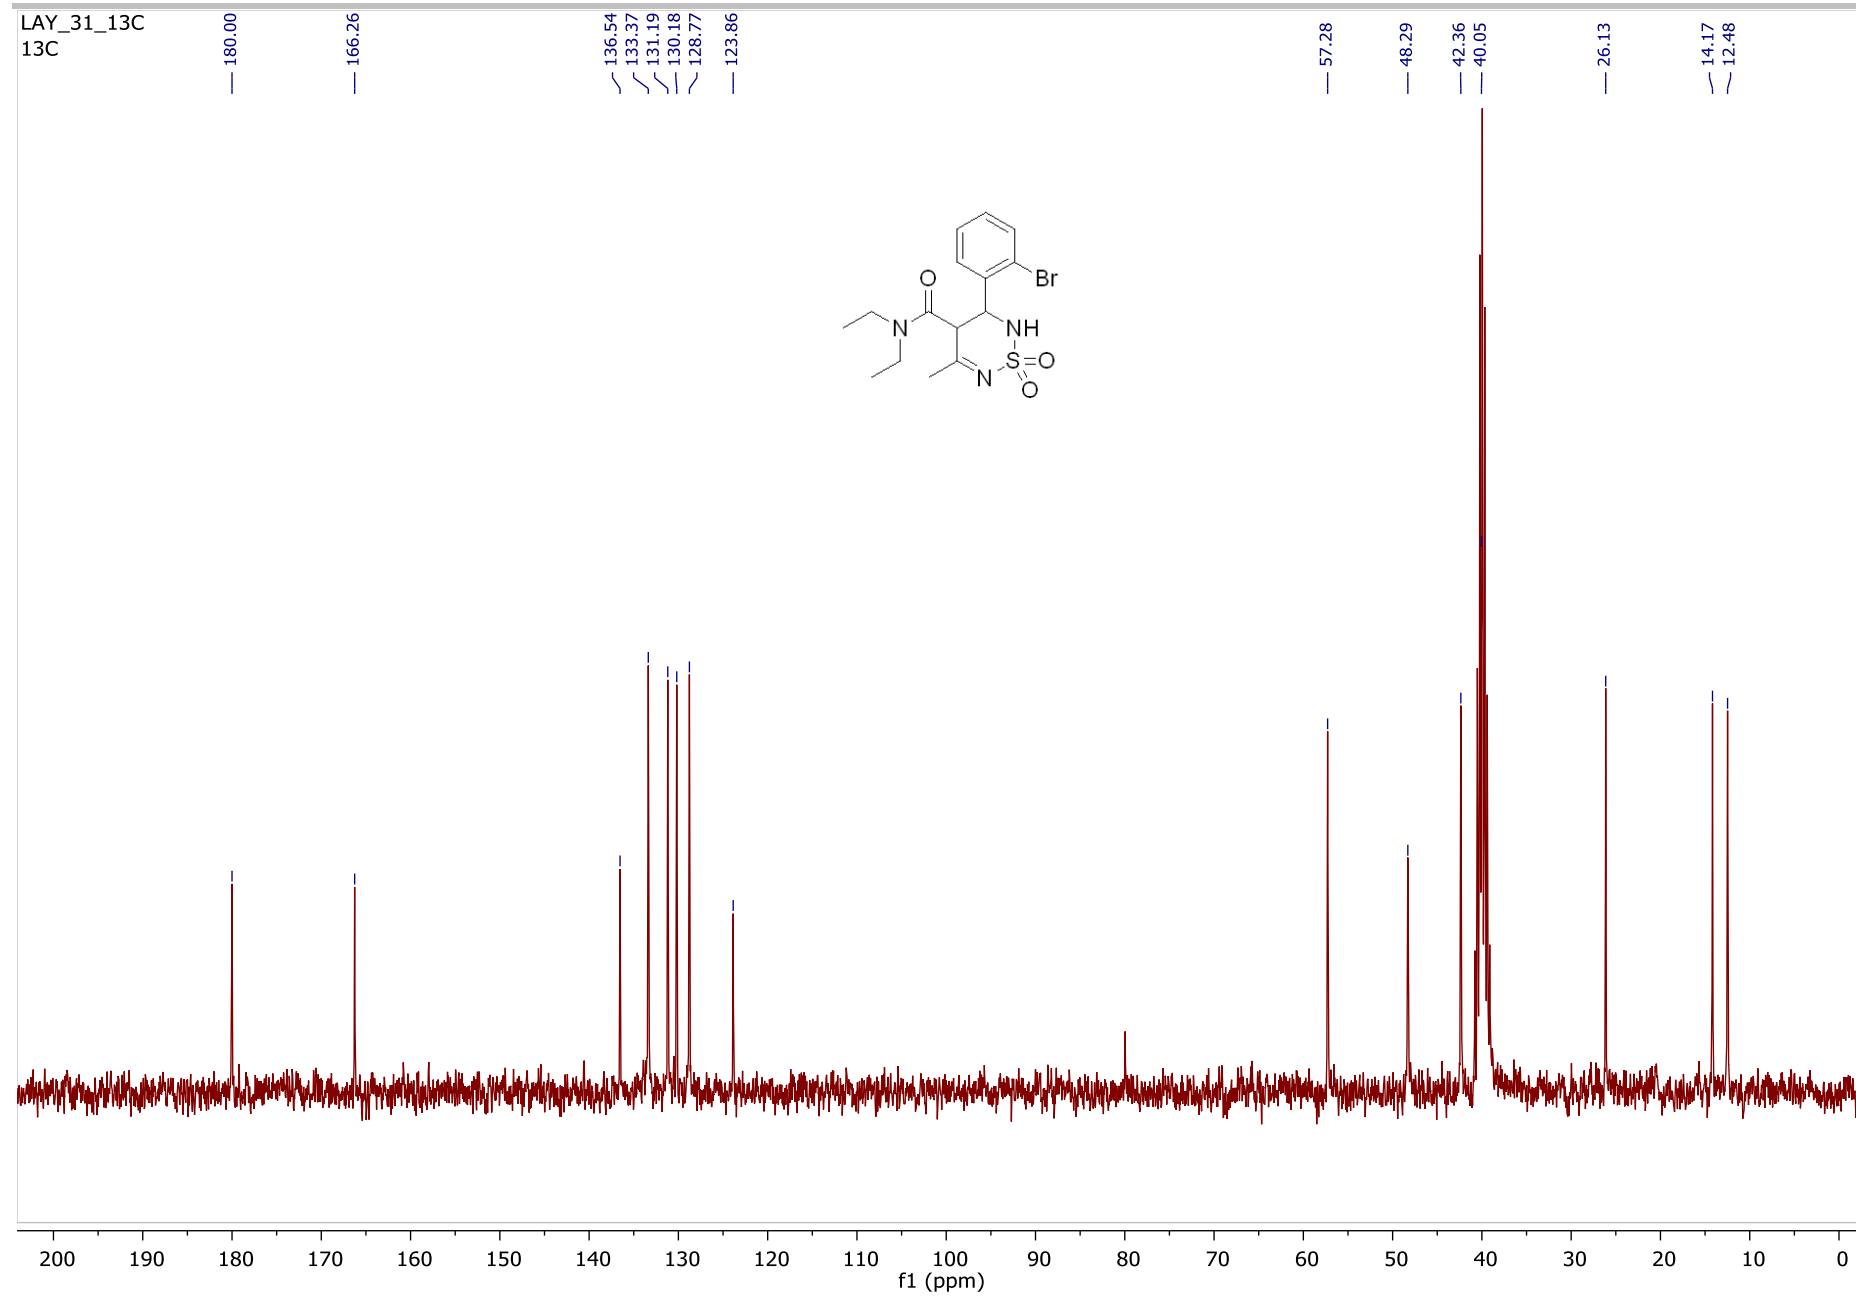

# SUPPORTING INFORMATION

## <sup>1</sup>H and <sup>13</sup>C NMR spectra of the compound 7ci

LAY\_27\_1H

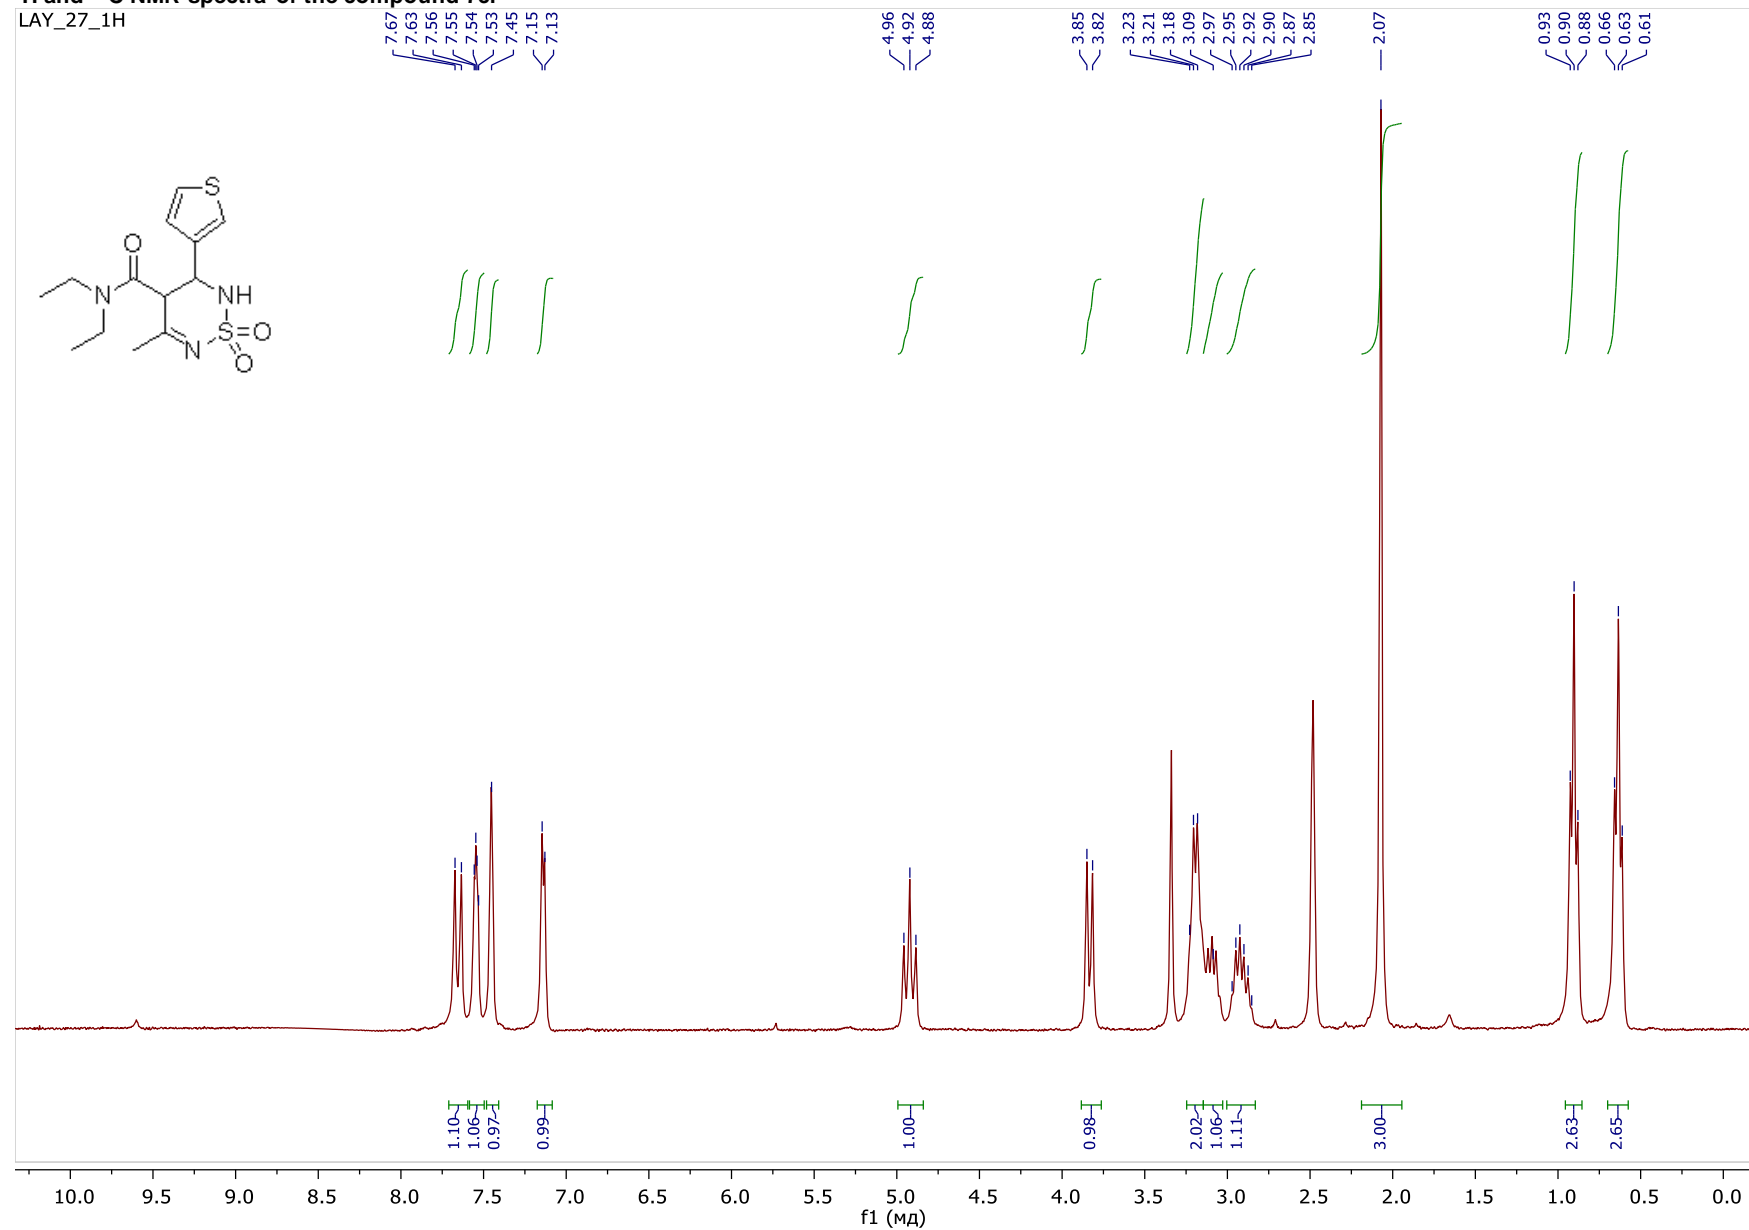

# SUPPORTING INFORMATION

LAY\_27\_13C  
13C

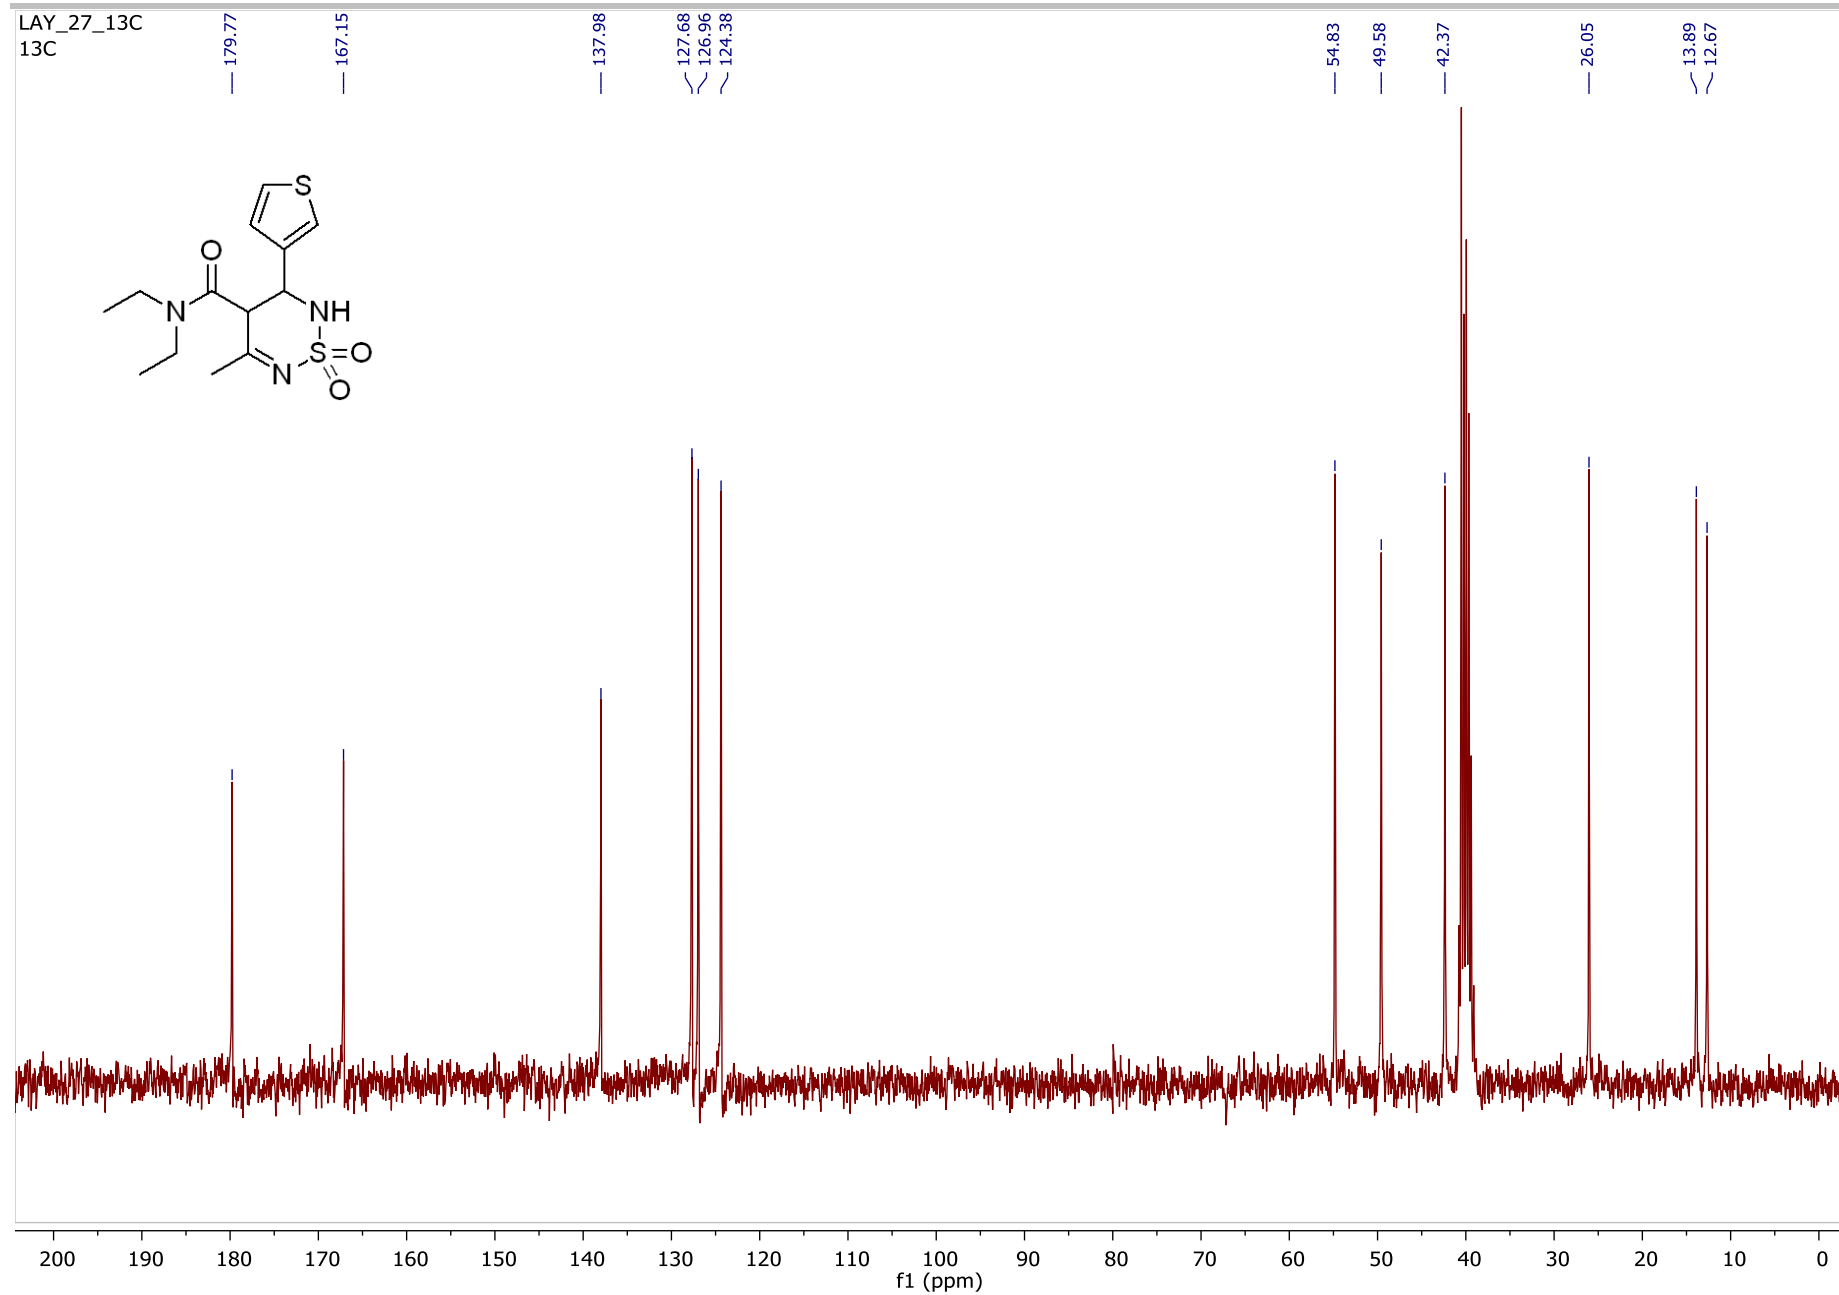

# SUPPORTING INFORMATION

## <sup>1</sup>H and <sup>13</sup>C NMR spectra of the compound 7cj

van-lay283

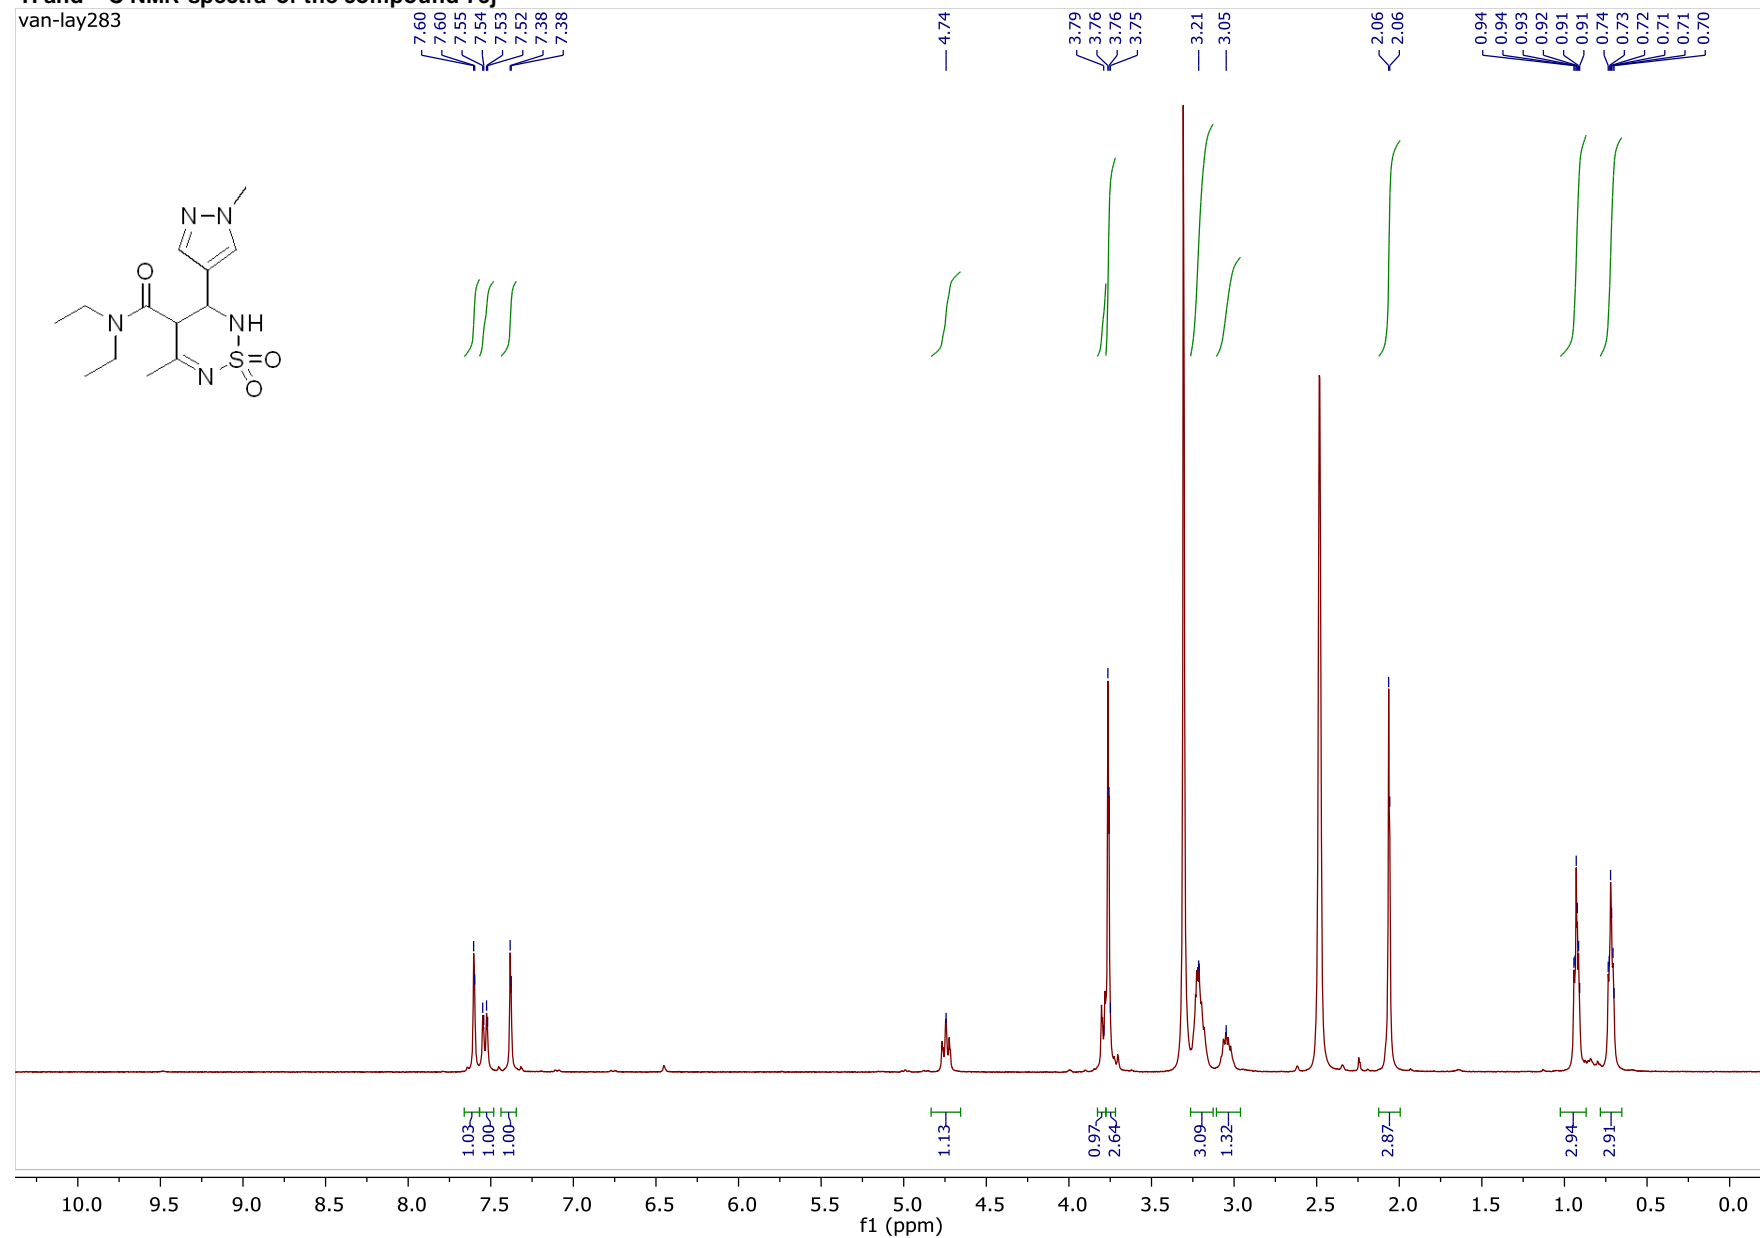



# SUPPORTING INFORMATION

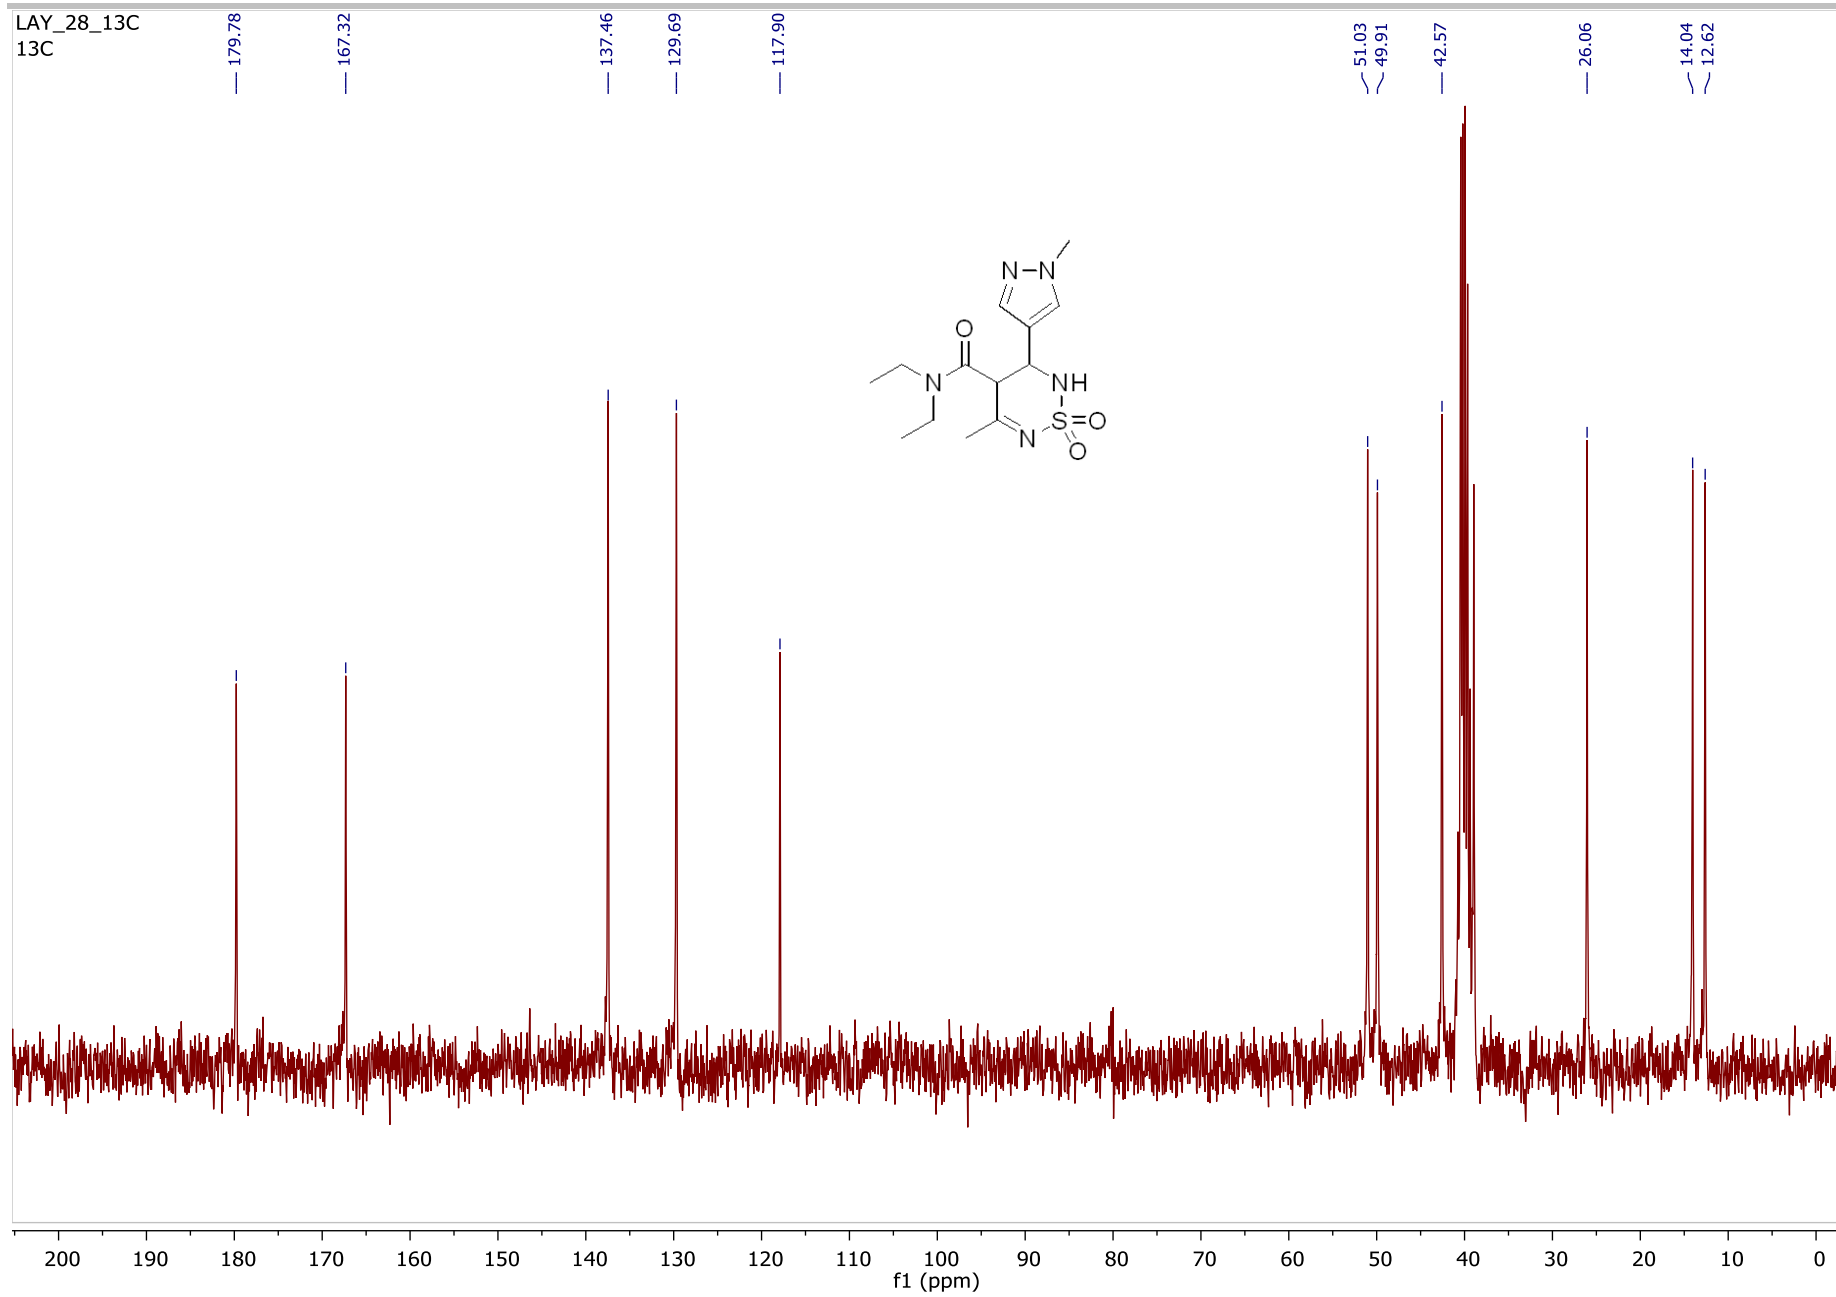

# SUPPORTING INFORMATION

## <sup>1</sup>H and <sup>13</sup>C NMR spectra of the compound 7ck

van-lay293.1.fid

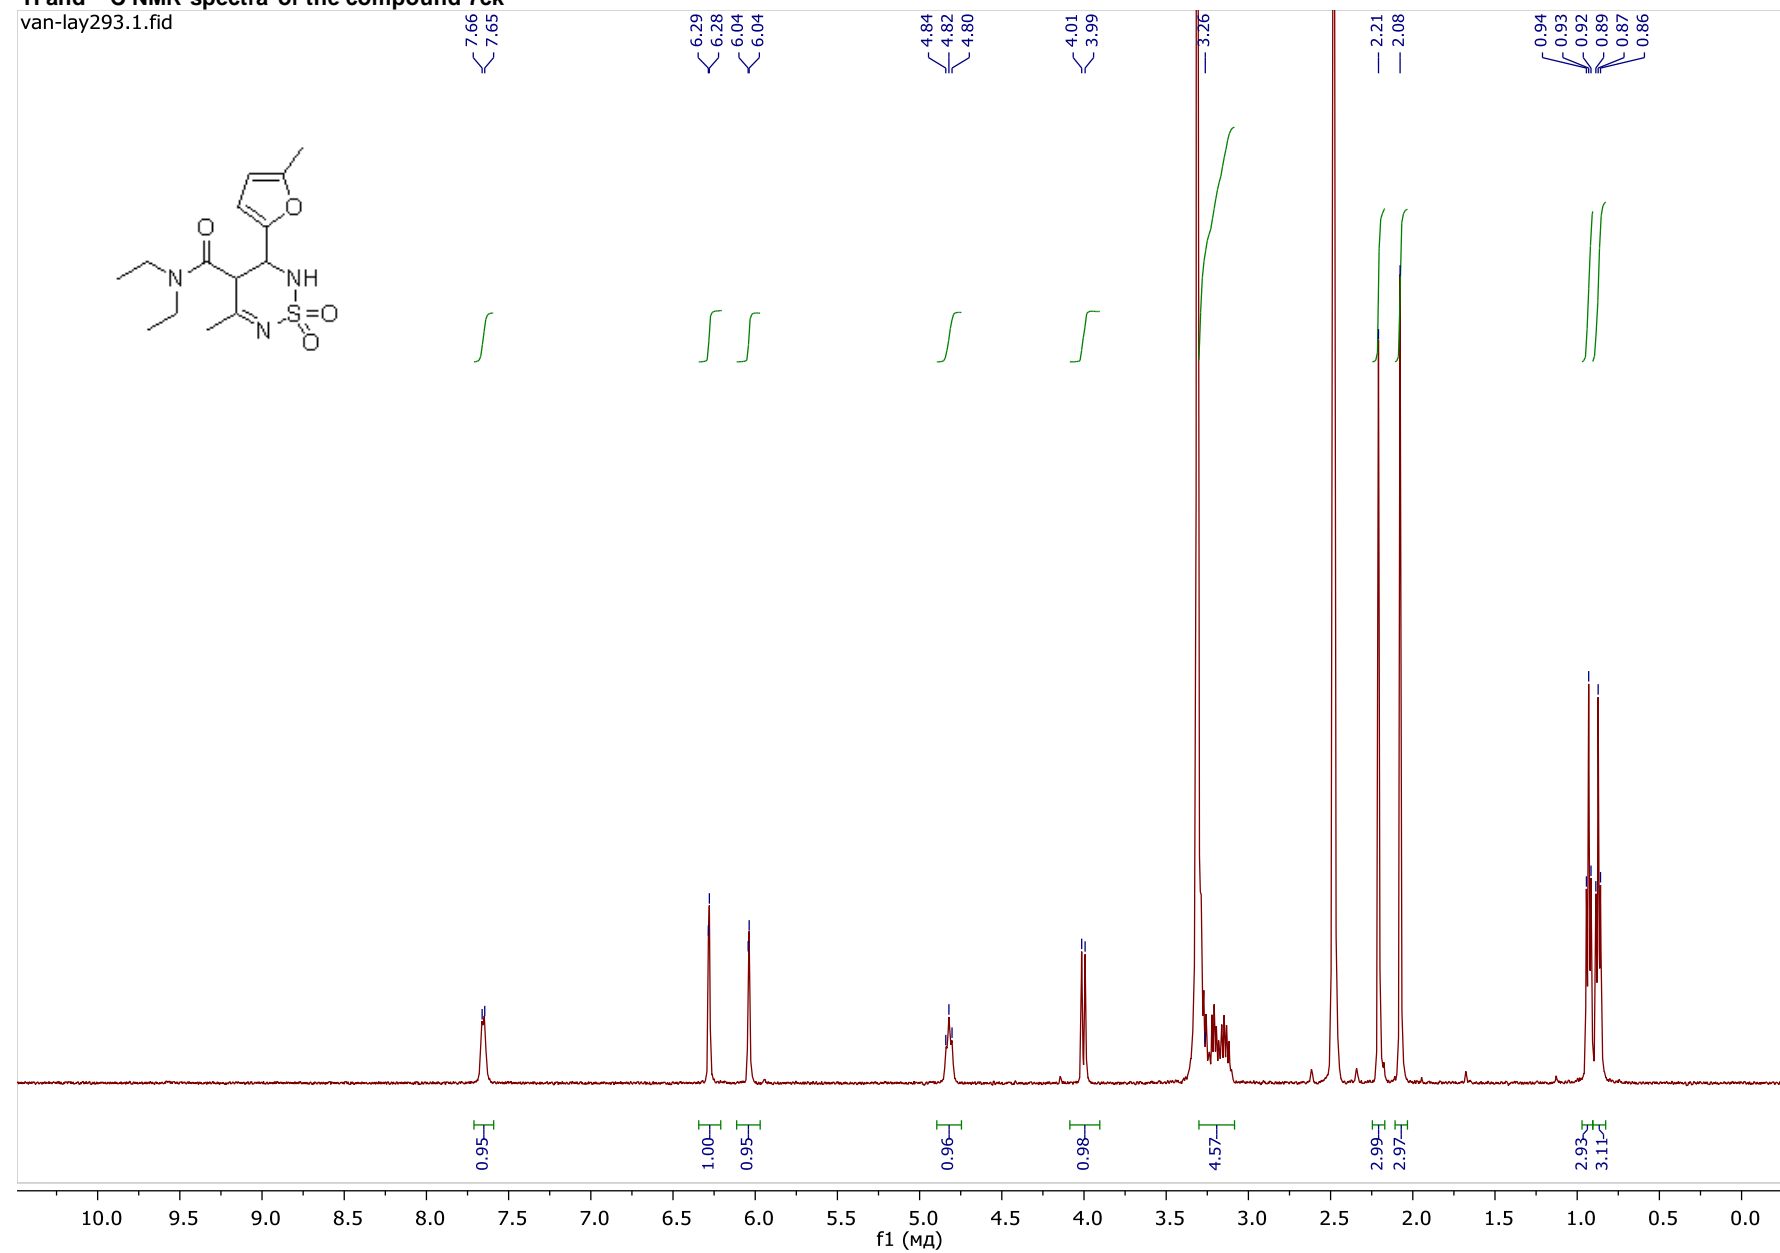

# SUPPORTING INFORMATION

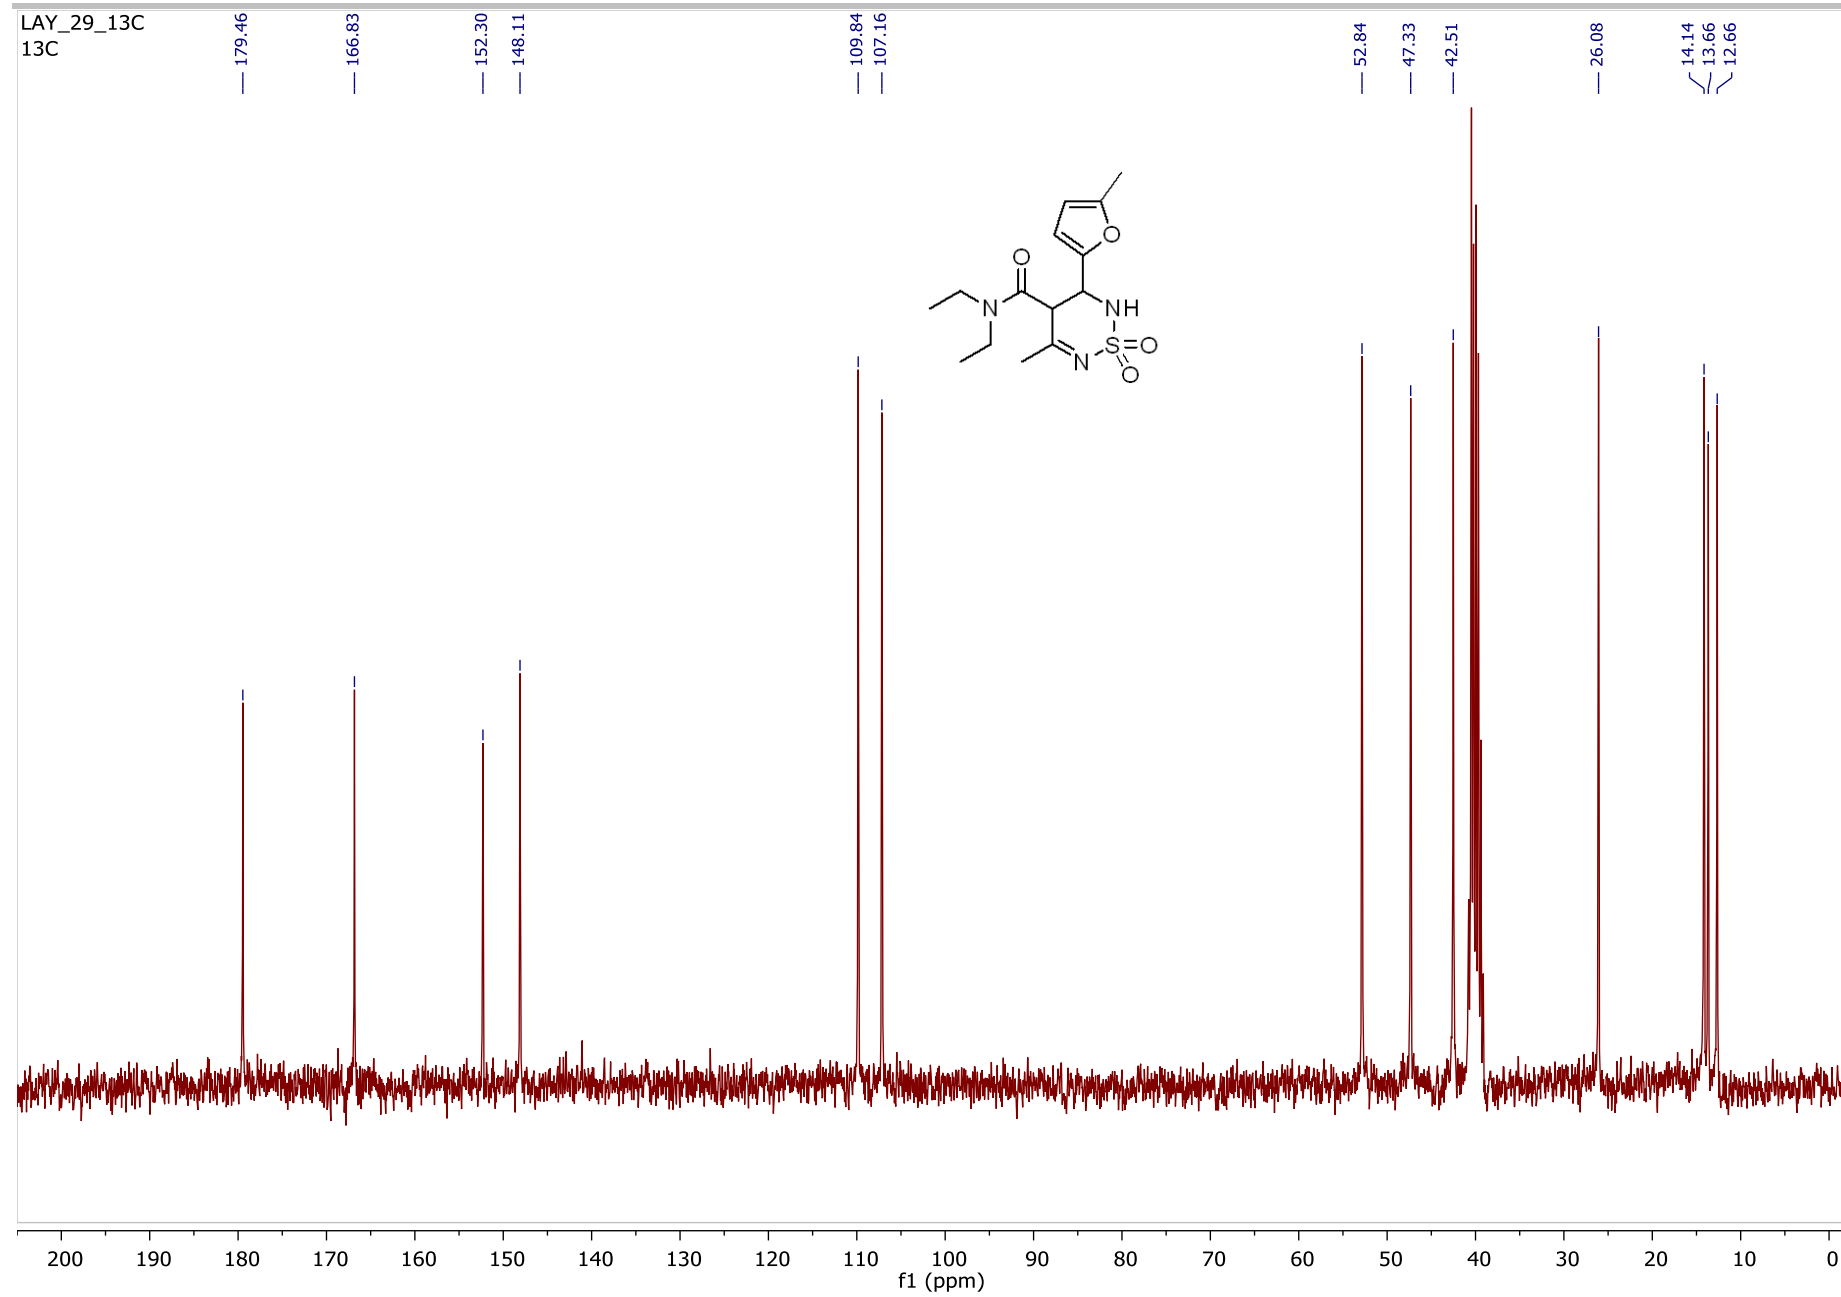

# SUPPORTING INFORMATION

<sup>1</sup>H and <sup>13</sup>C NMR spectra of the compound 8cc

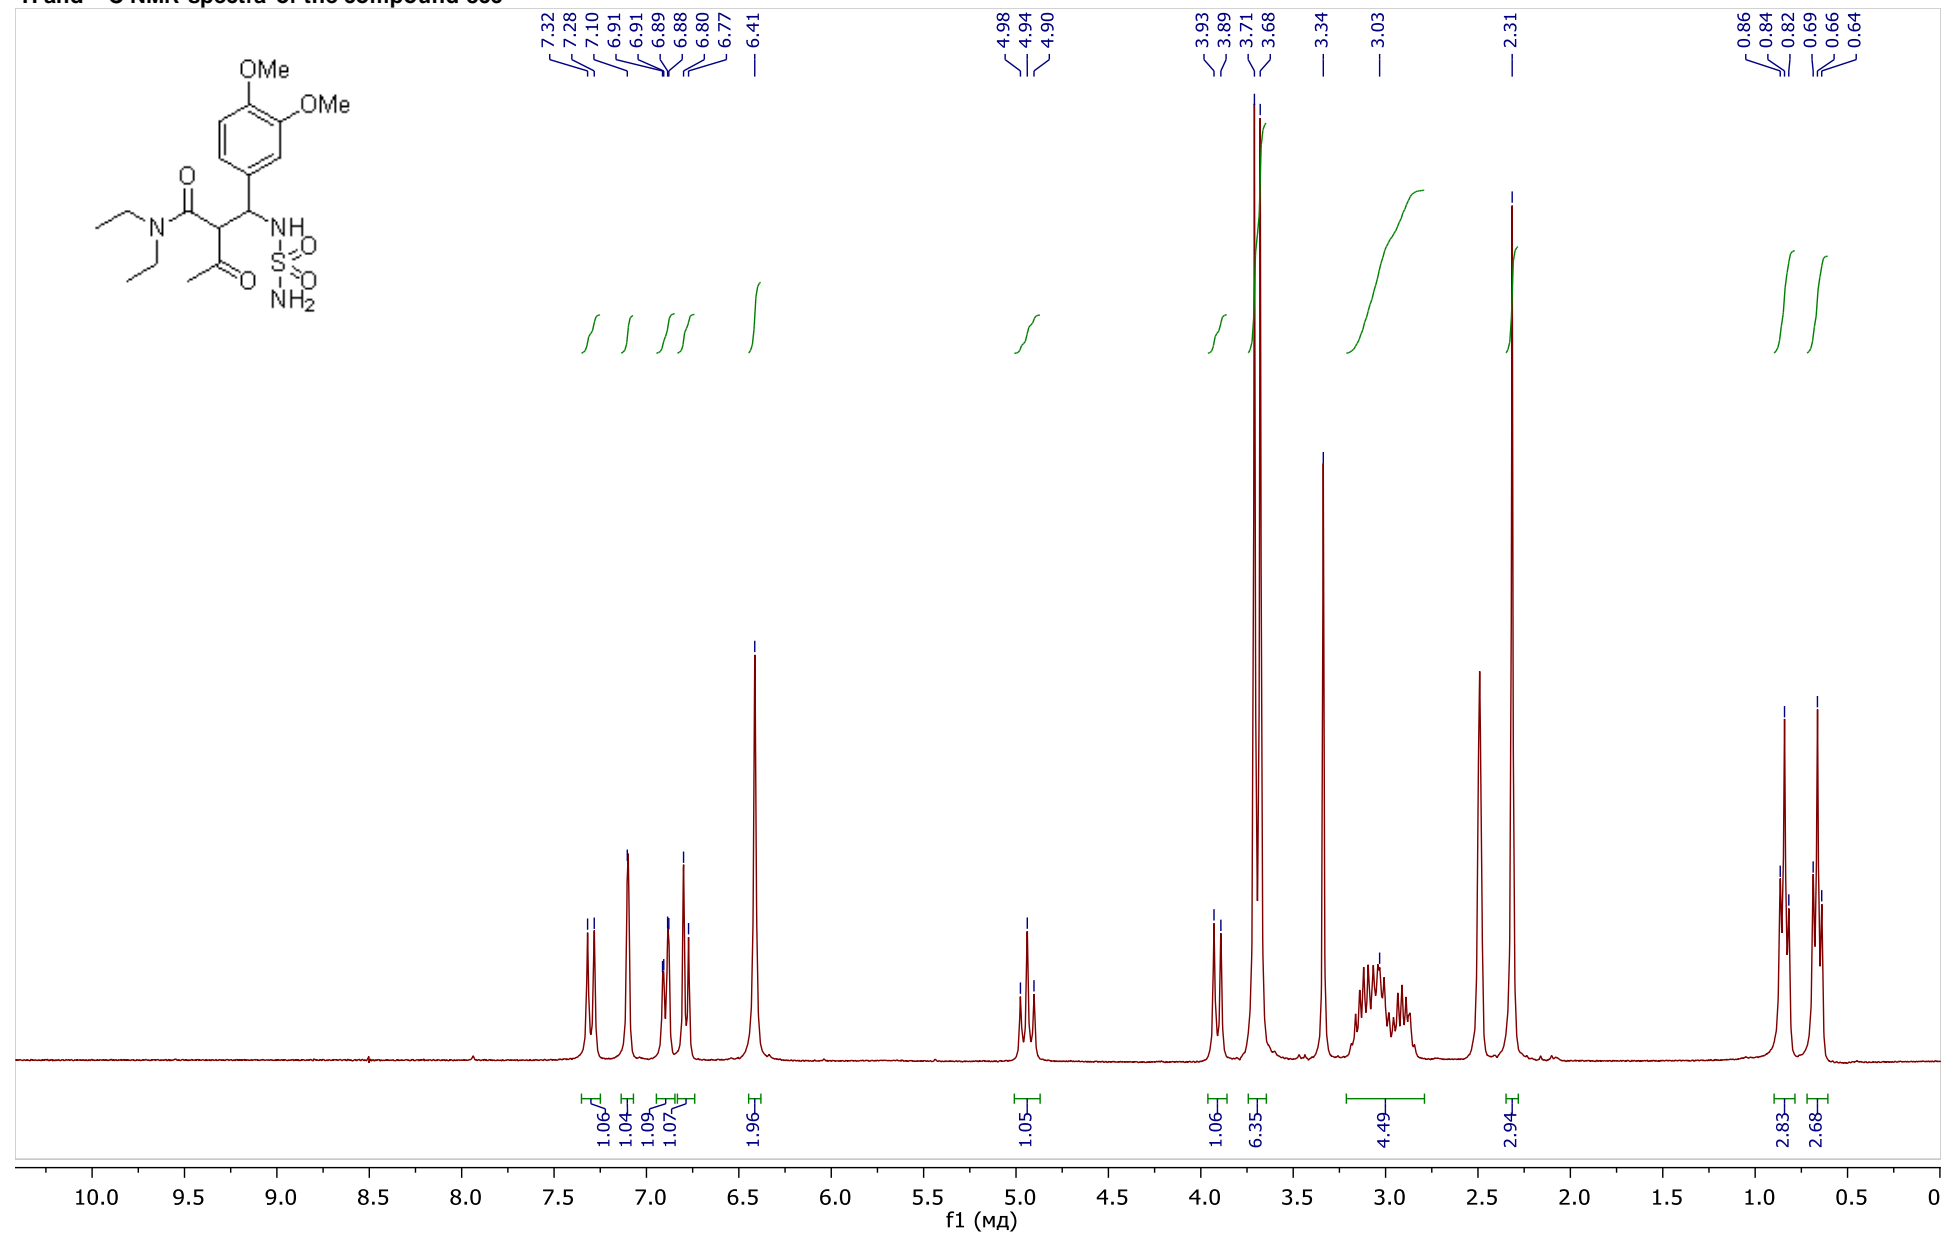

# SUPPORTING INFORMATION

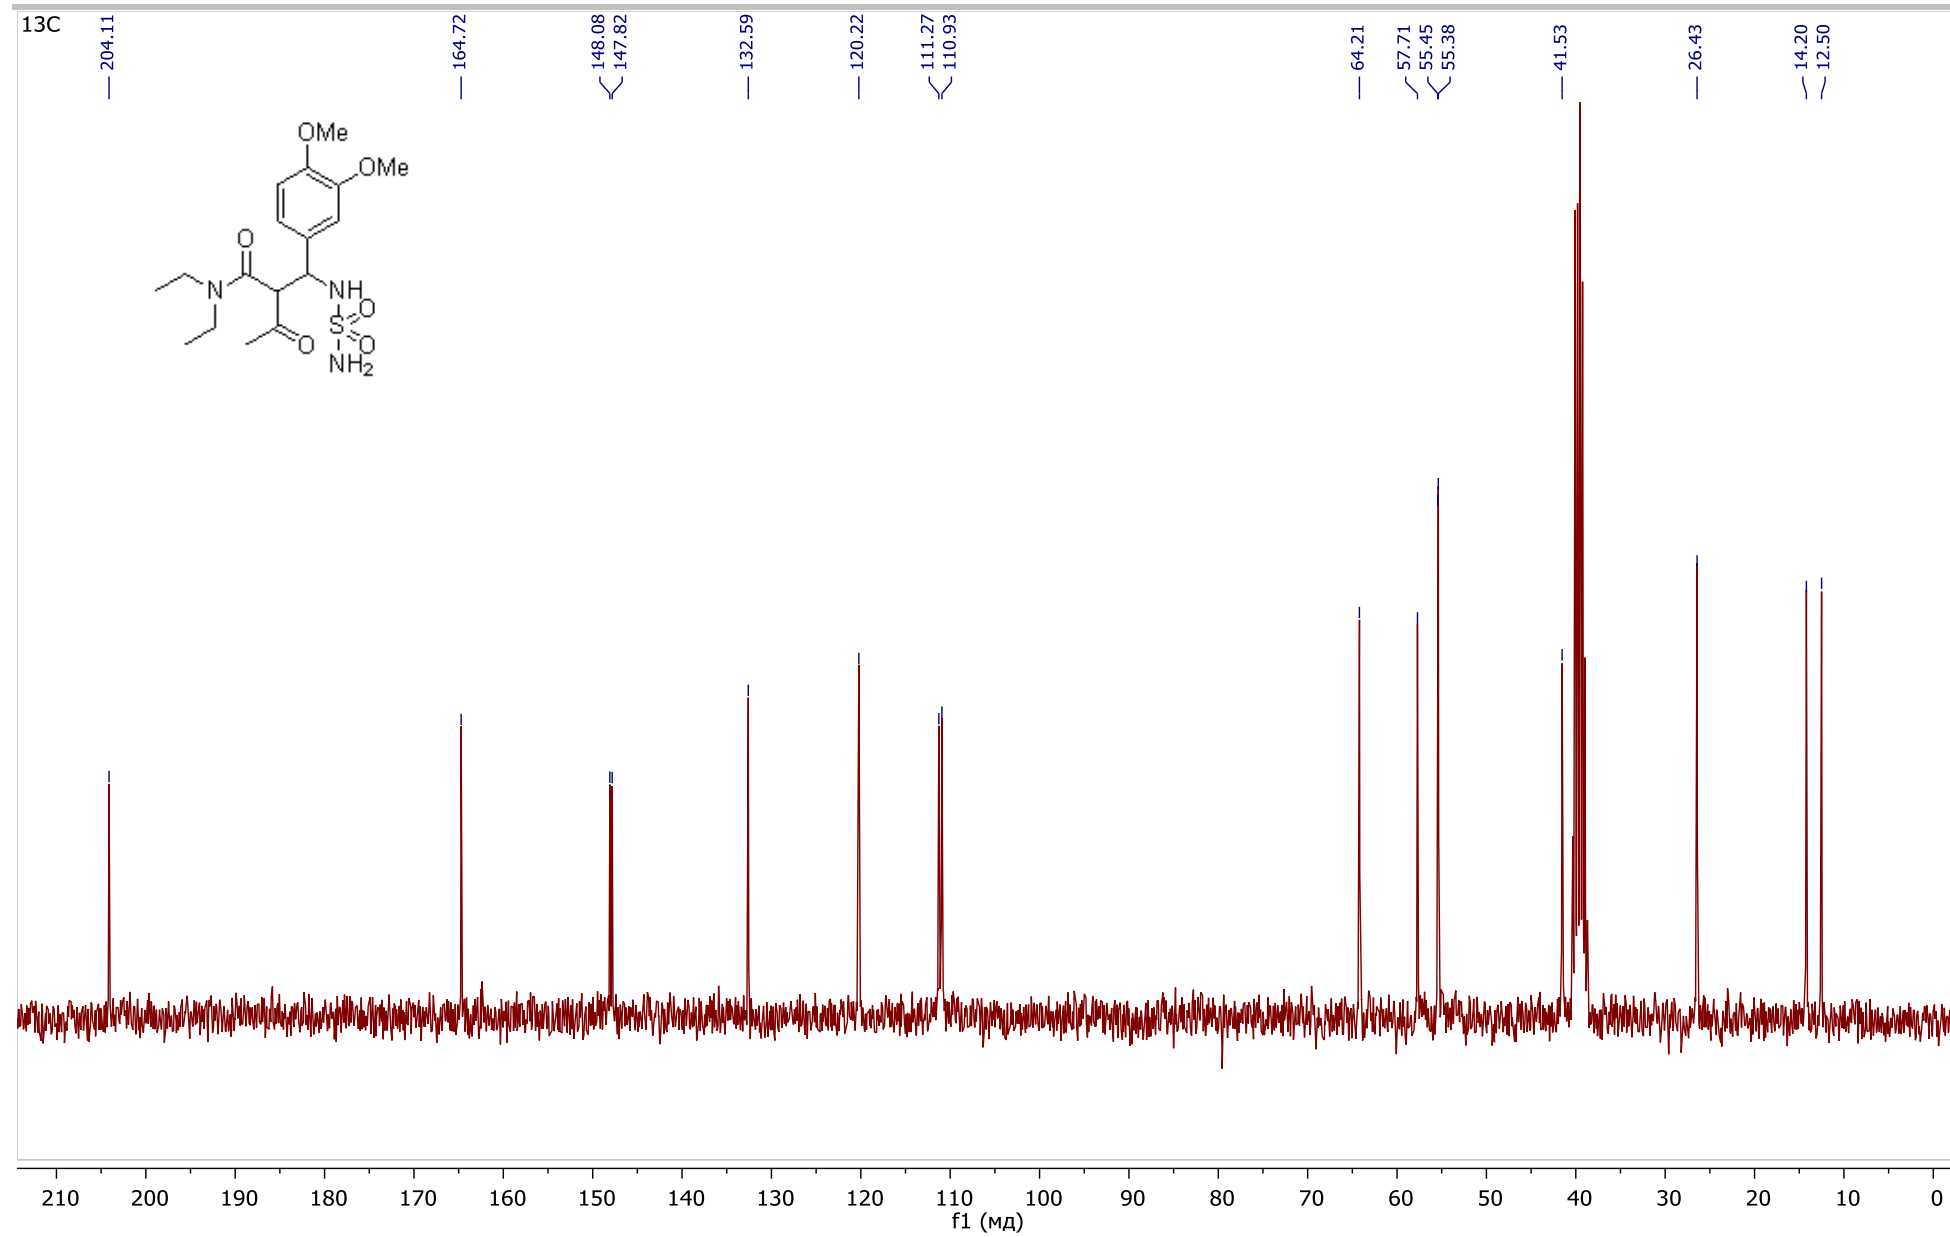

# SUPPORTING INFORMATION

## <sup>1</sup>H and <sup>13</sup>C NMR spectra of the compound 8dd

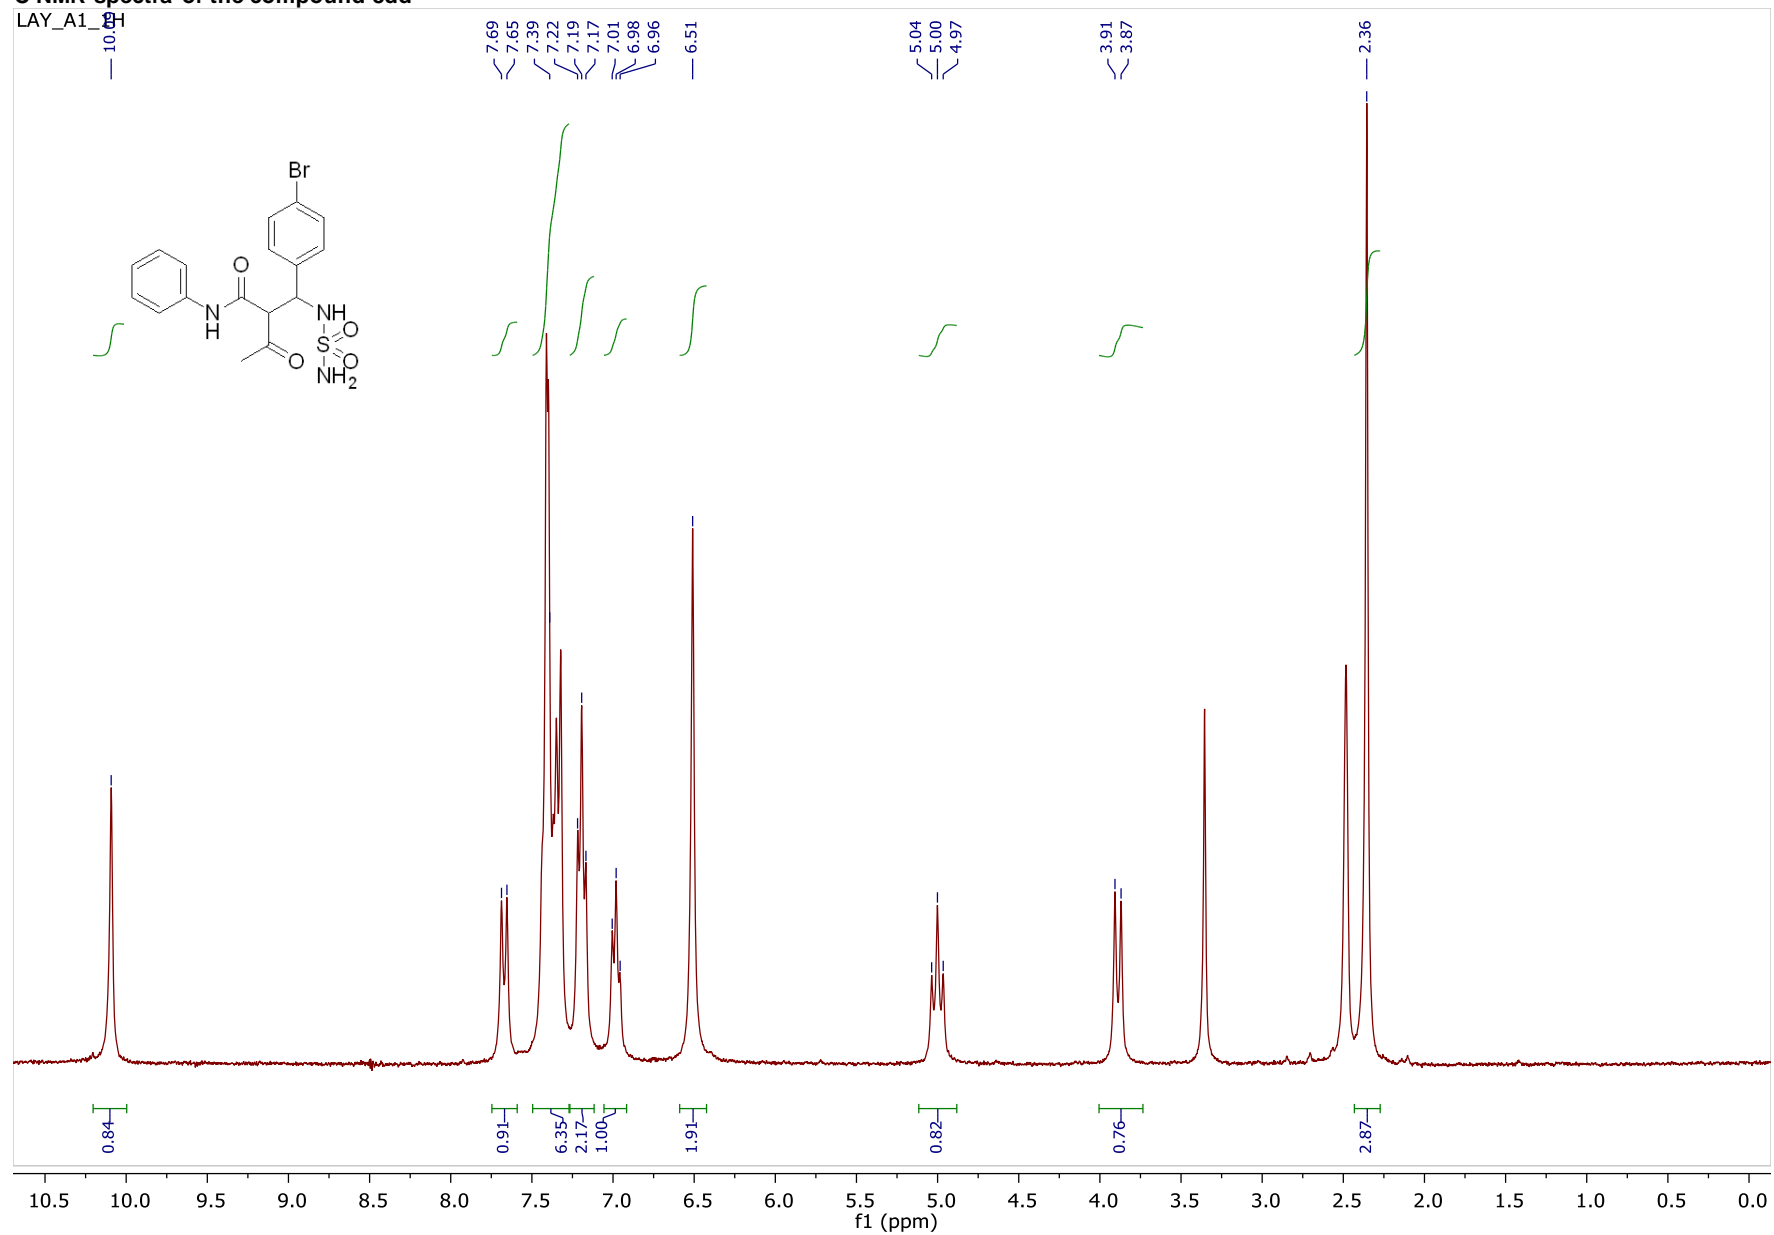

# SUPPORTING INFORMATION

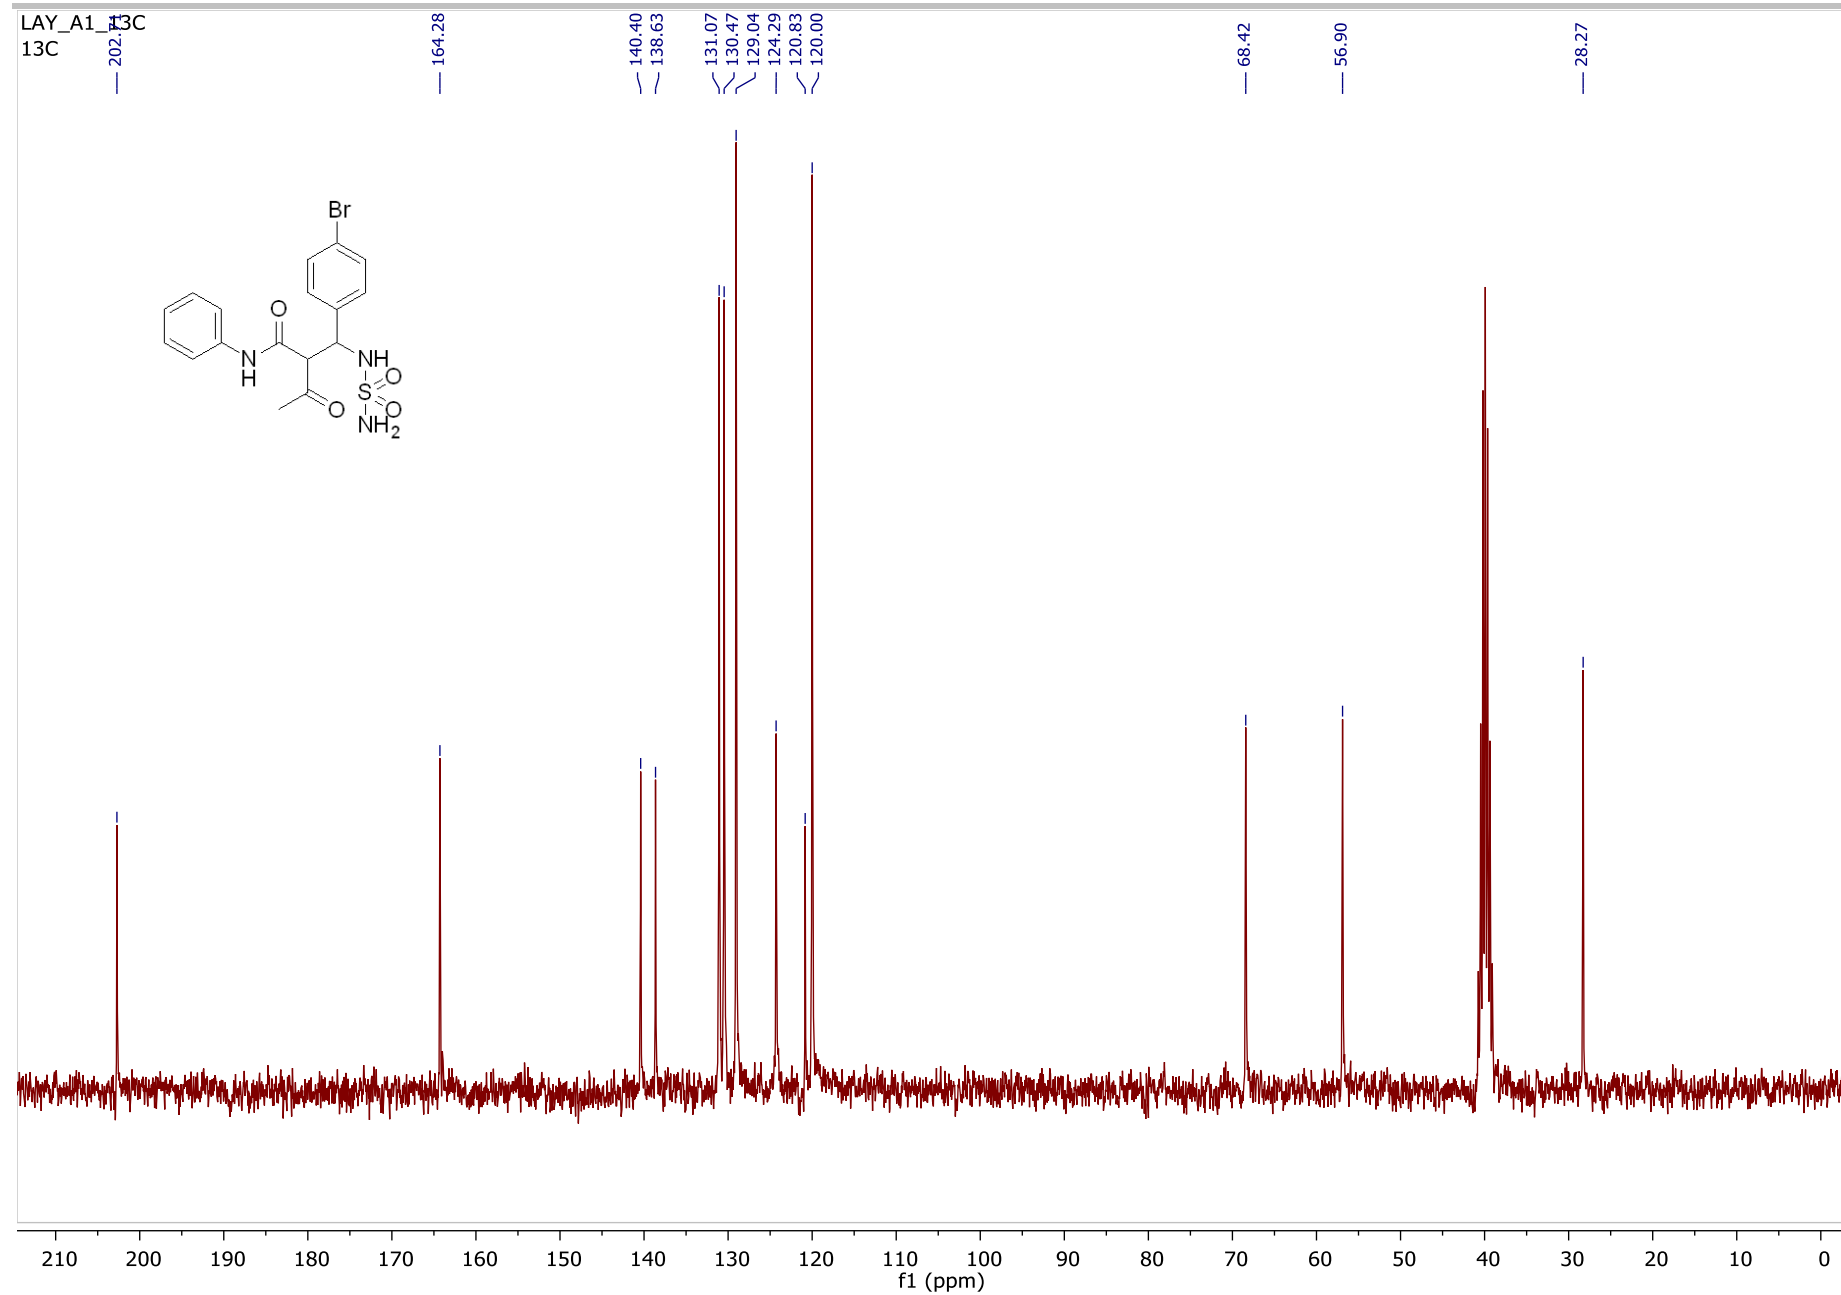

# SUPPORTING INFORMATION

## <sup>1</sup>H and <sup>13</sup>C NMR spectra of the compound 8de

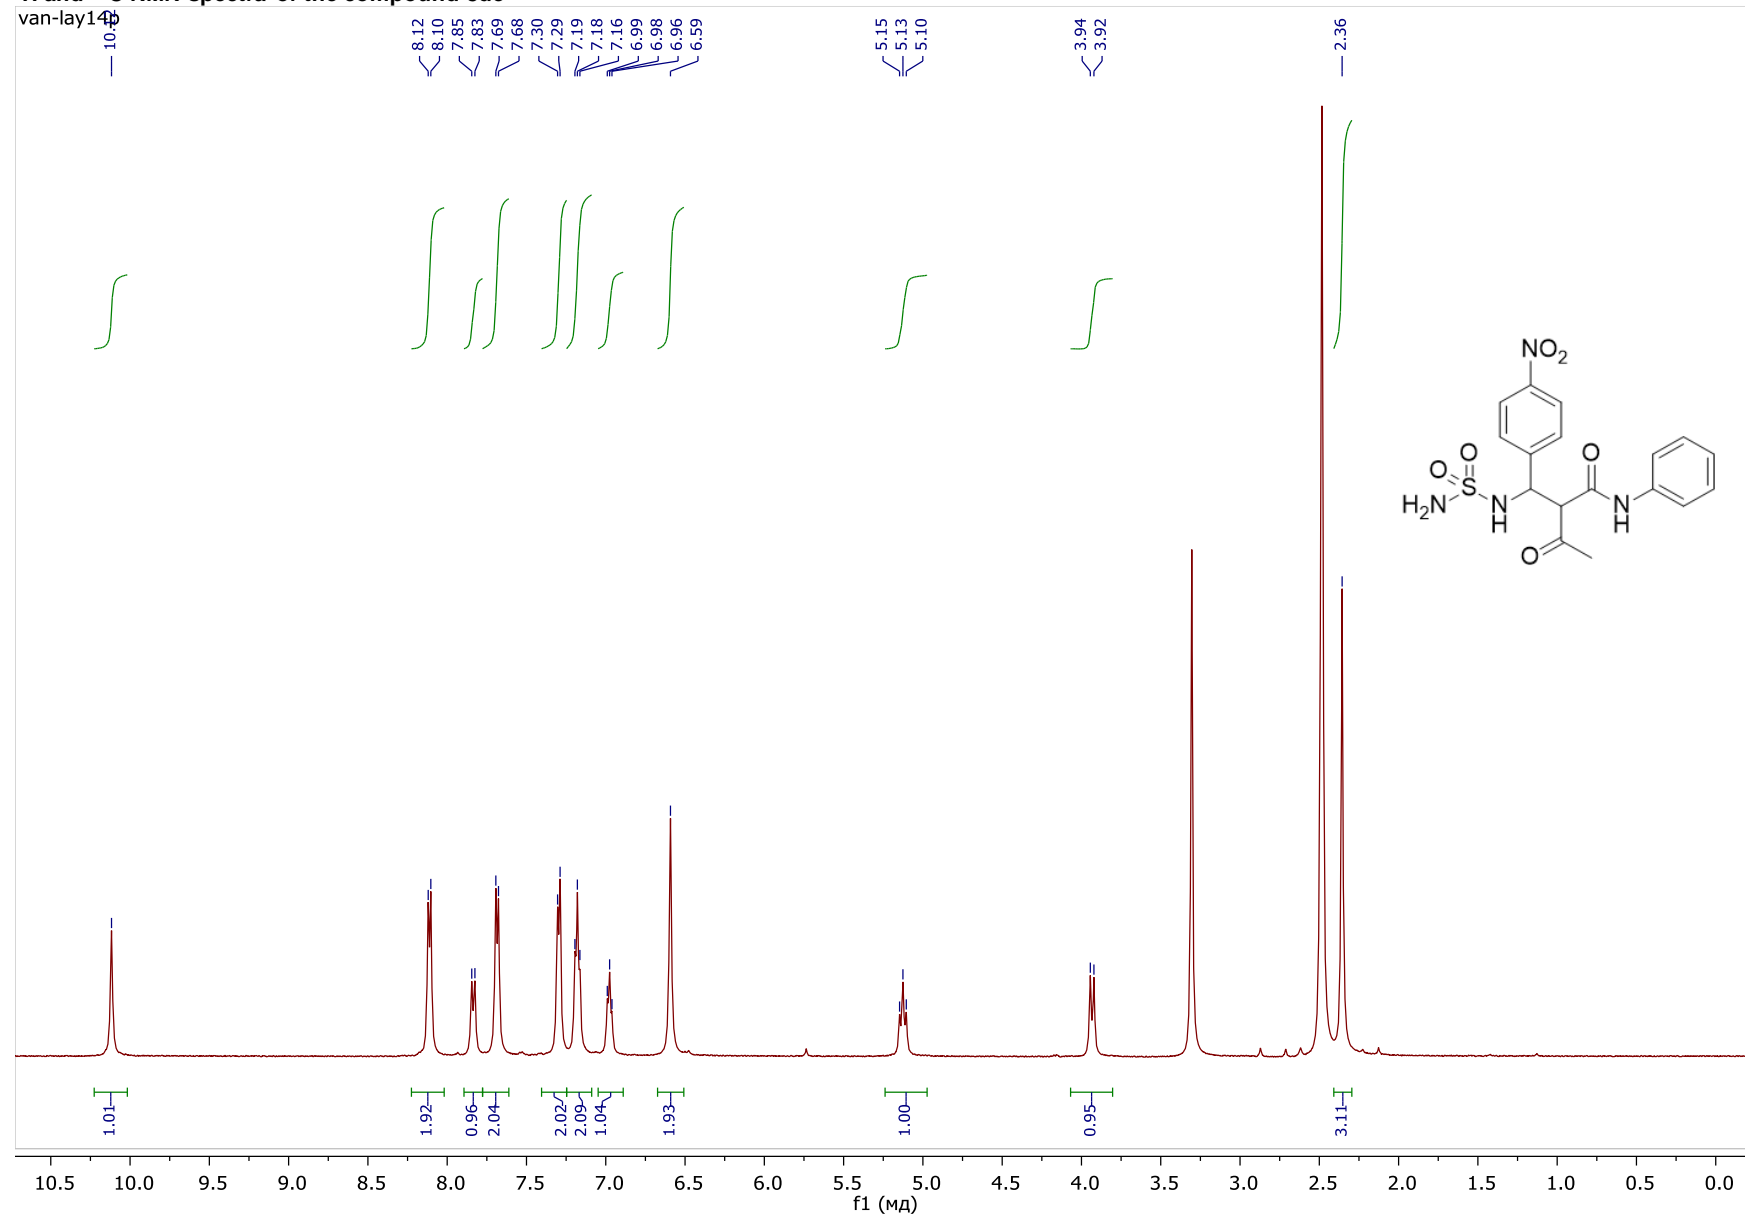



# SUPPORTING INFORMATION

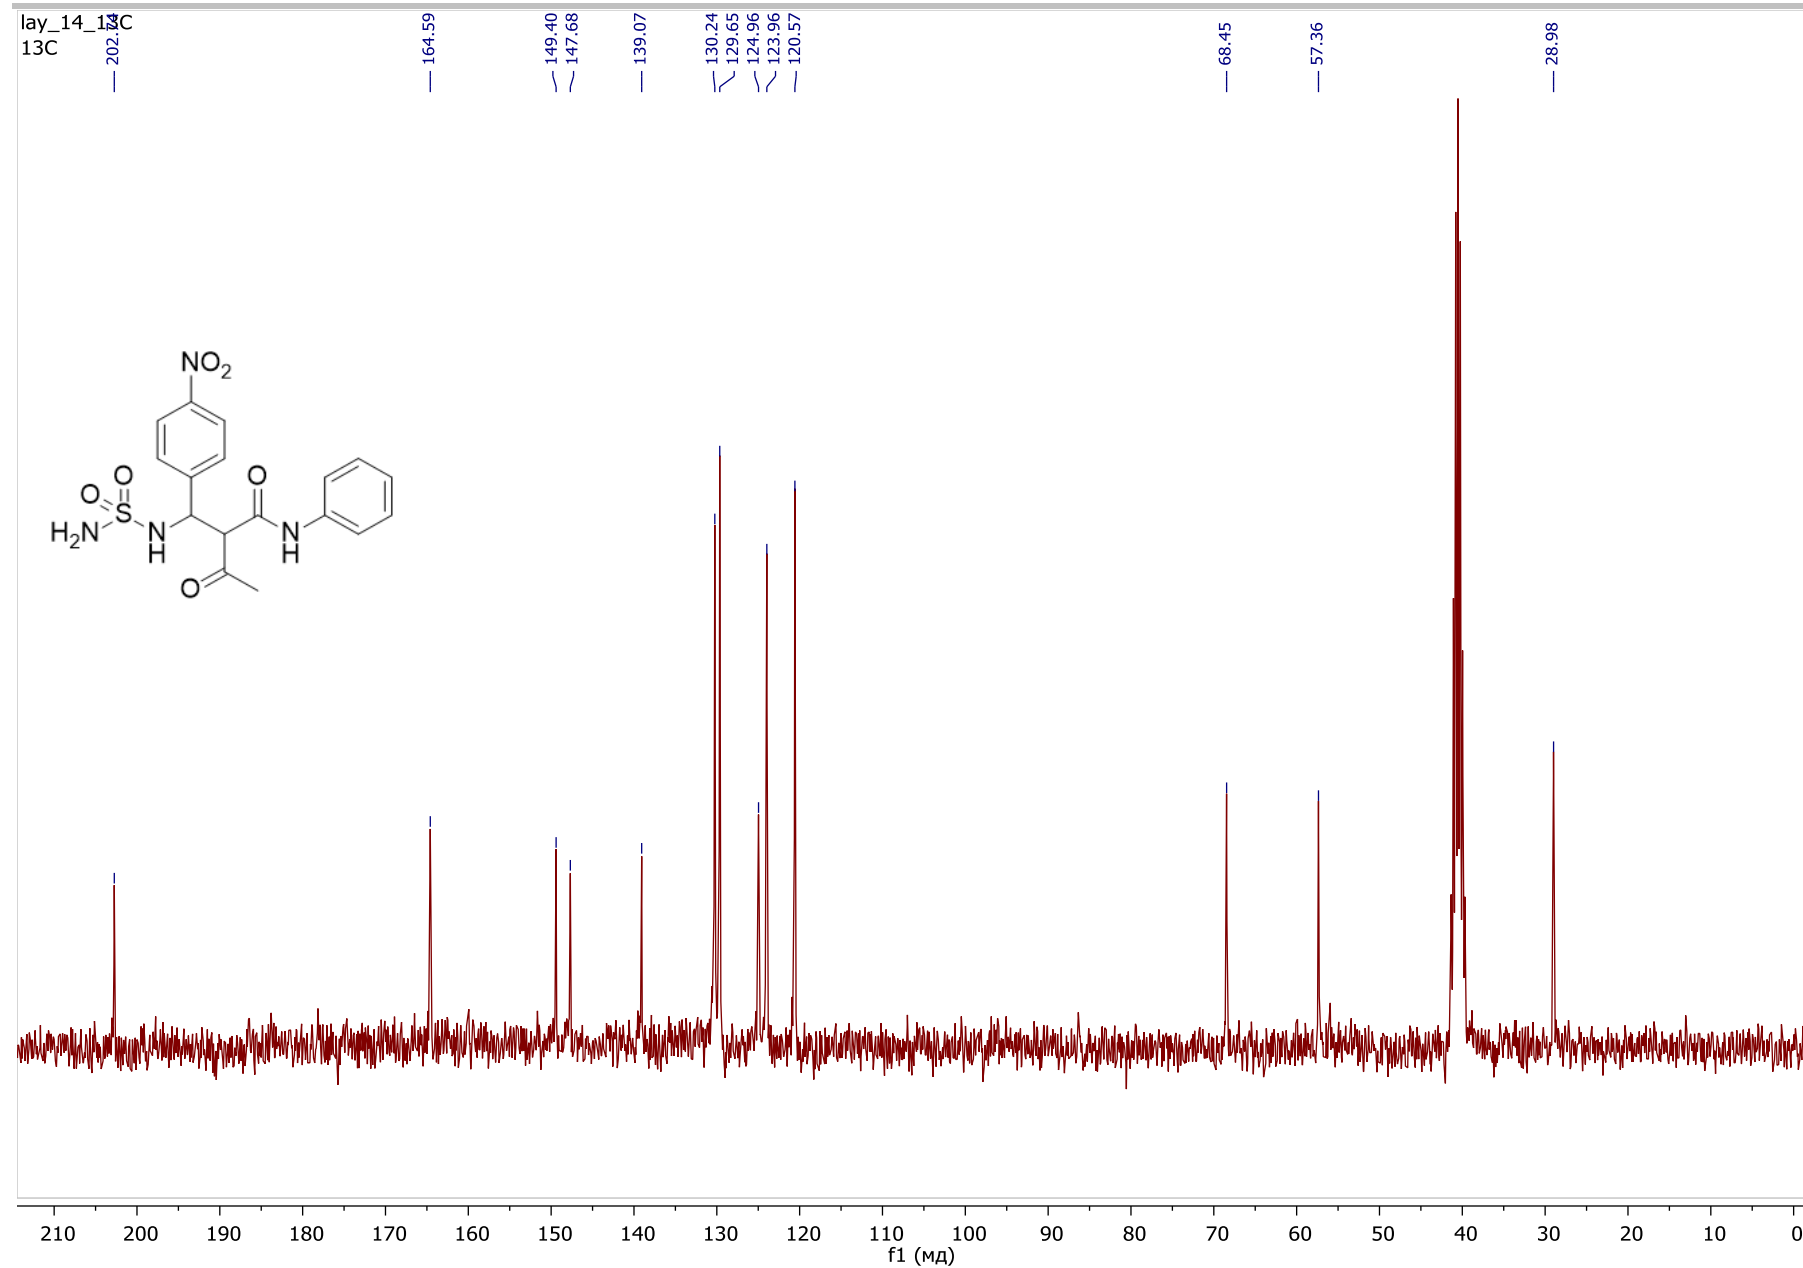

# SUPPORTING INFORMATION

## <sup>1</sup>H and <sup>13</sup>C NMR spectra of the compound 9ab

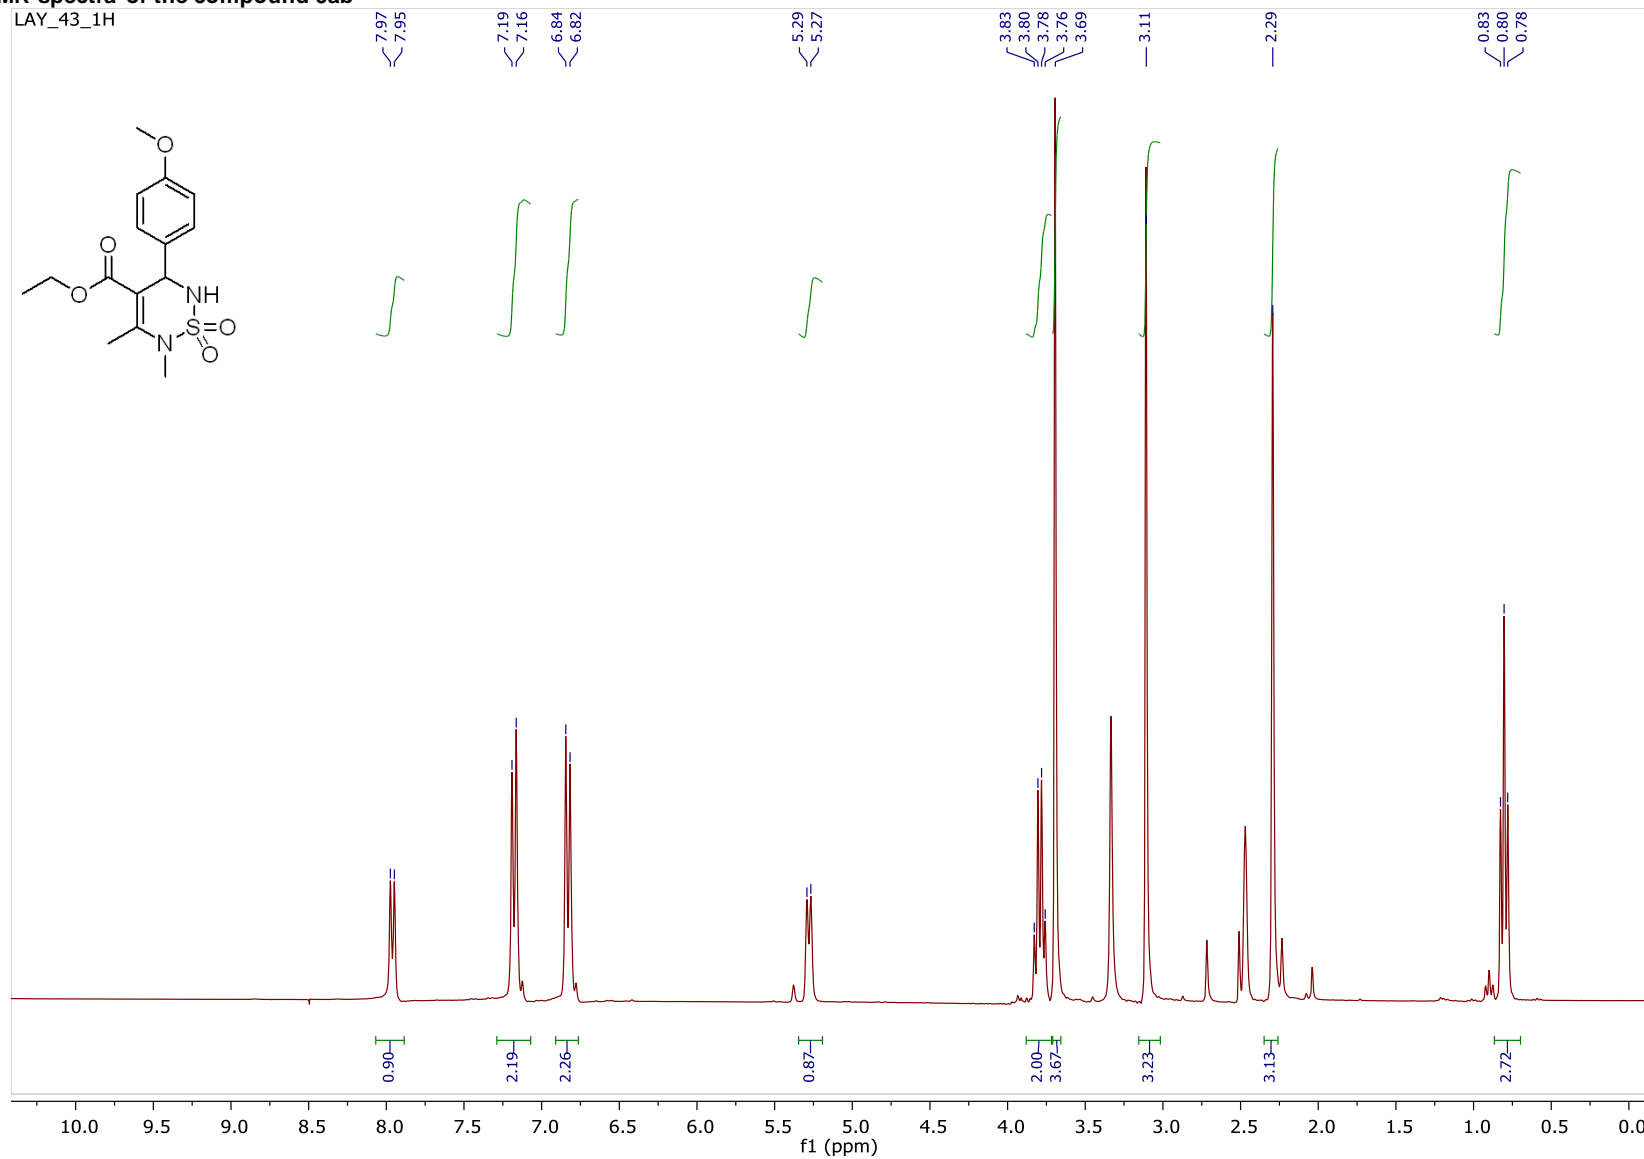

# SUPPORTING INFORMATION

LAY\_43\_13C  
13C

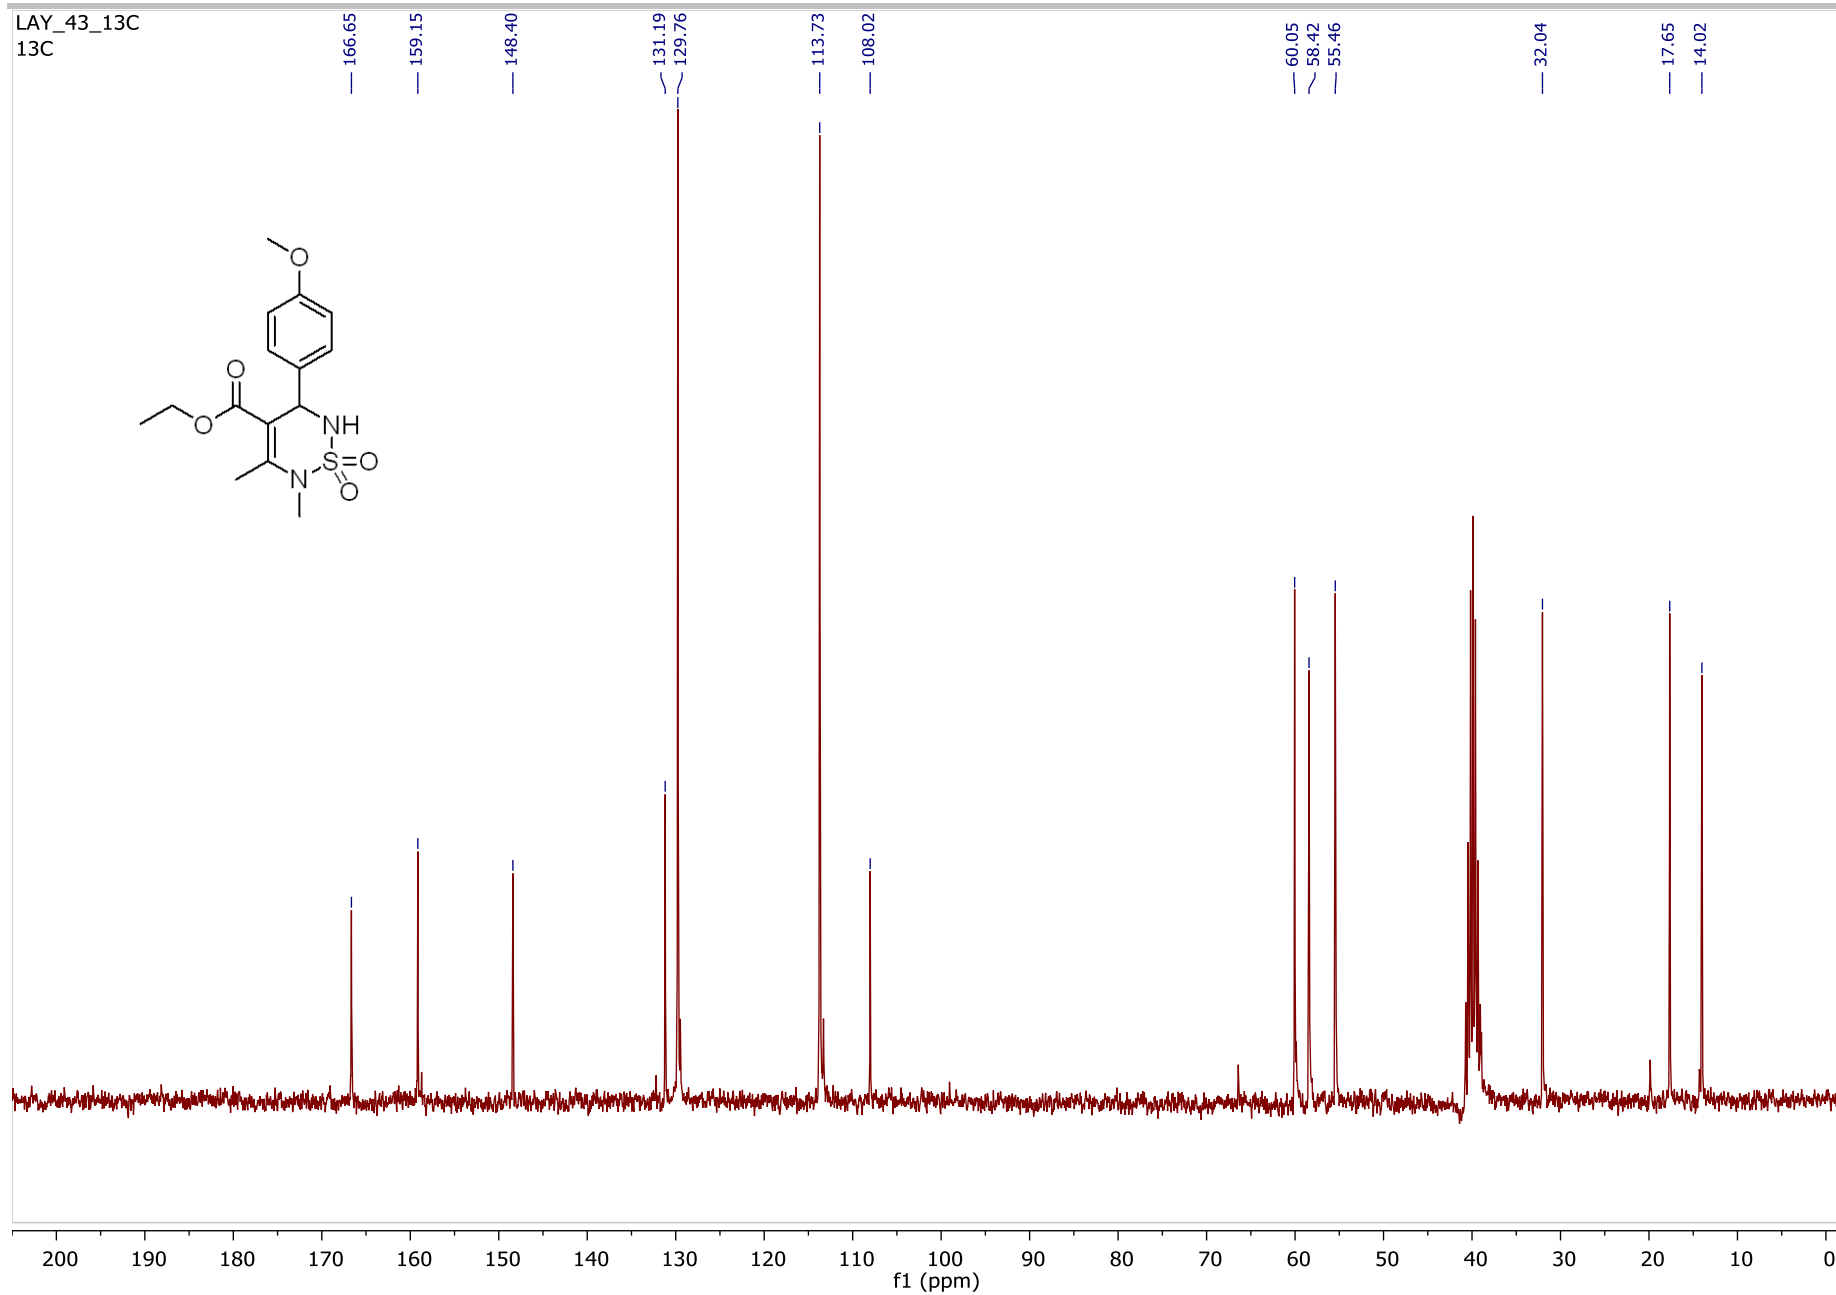

# SUPPORTING INFORMATION

## <sup>1</sup>H and <sup>13</sup>C NMR spectra of the compound 9cb

van-lay3911.1.fid

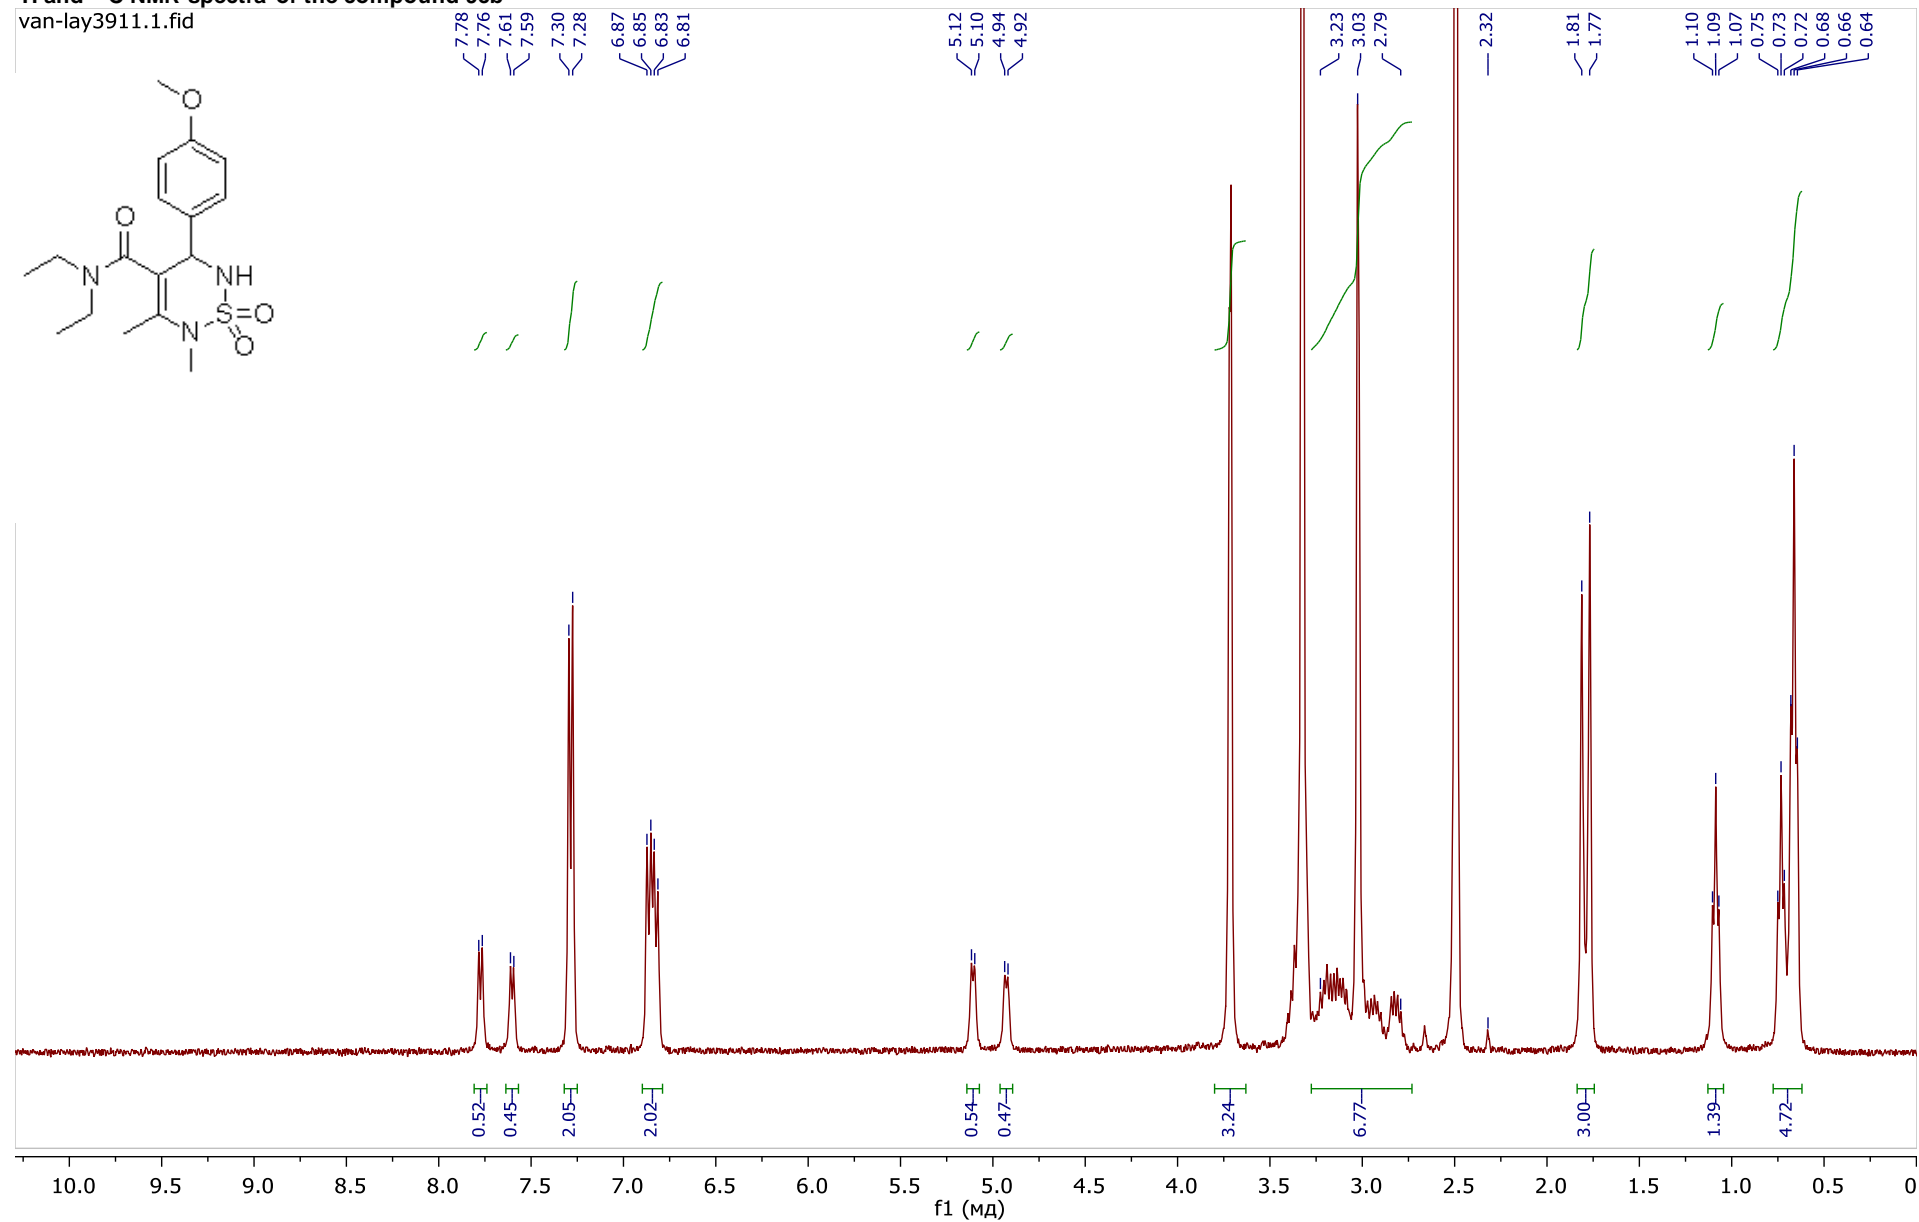

# SUPPORTING INFORMATION

LAY039\_13C\_01.12\_longtime  
13C

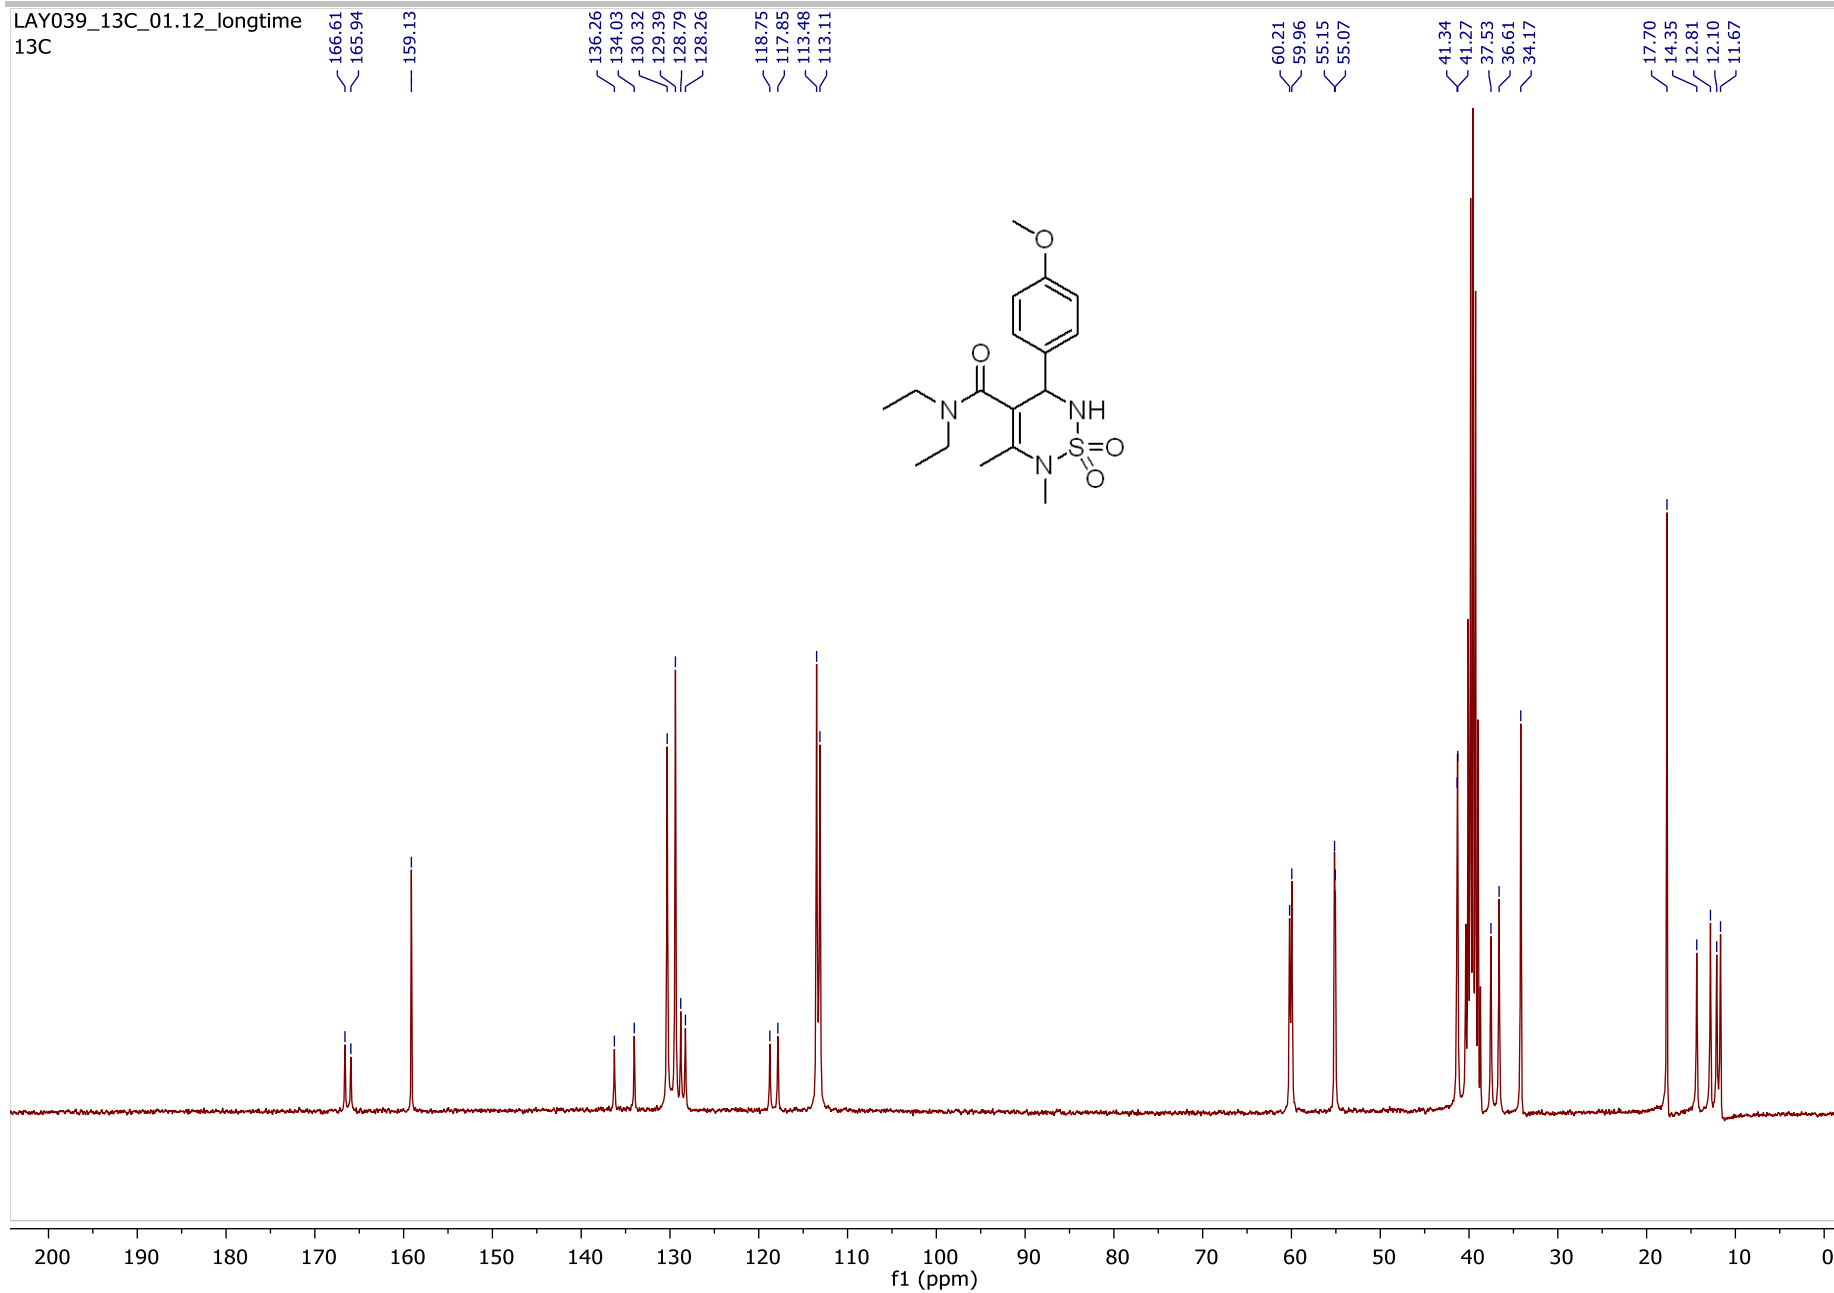

# SUPPORTING INFORMATION

## <sup>1</sup>H and <sup>13</sup>C NMR spectra of the compound 9db

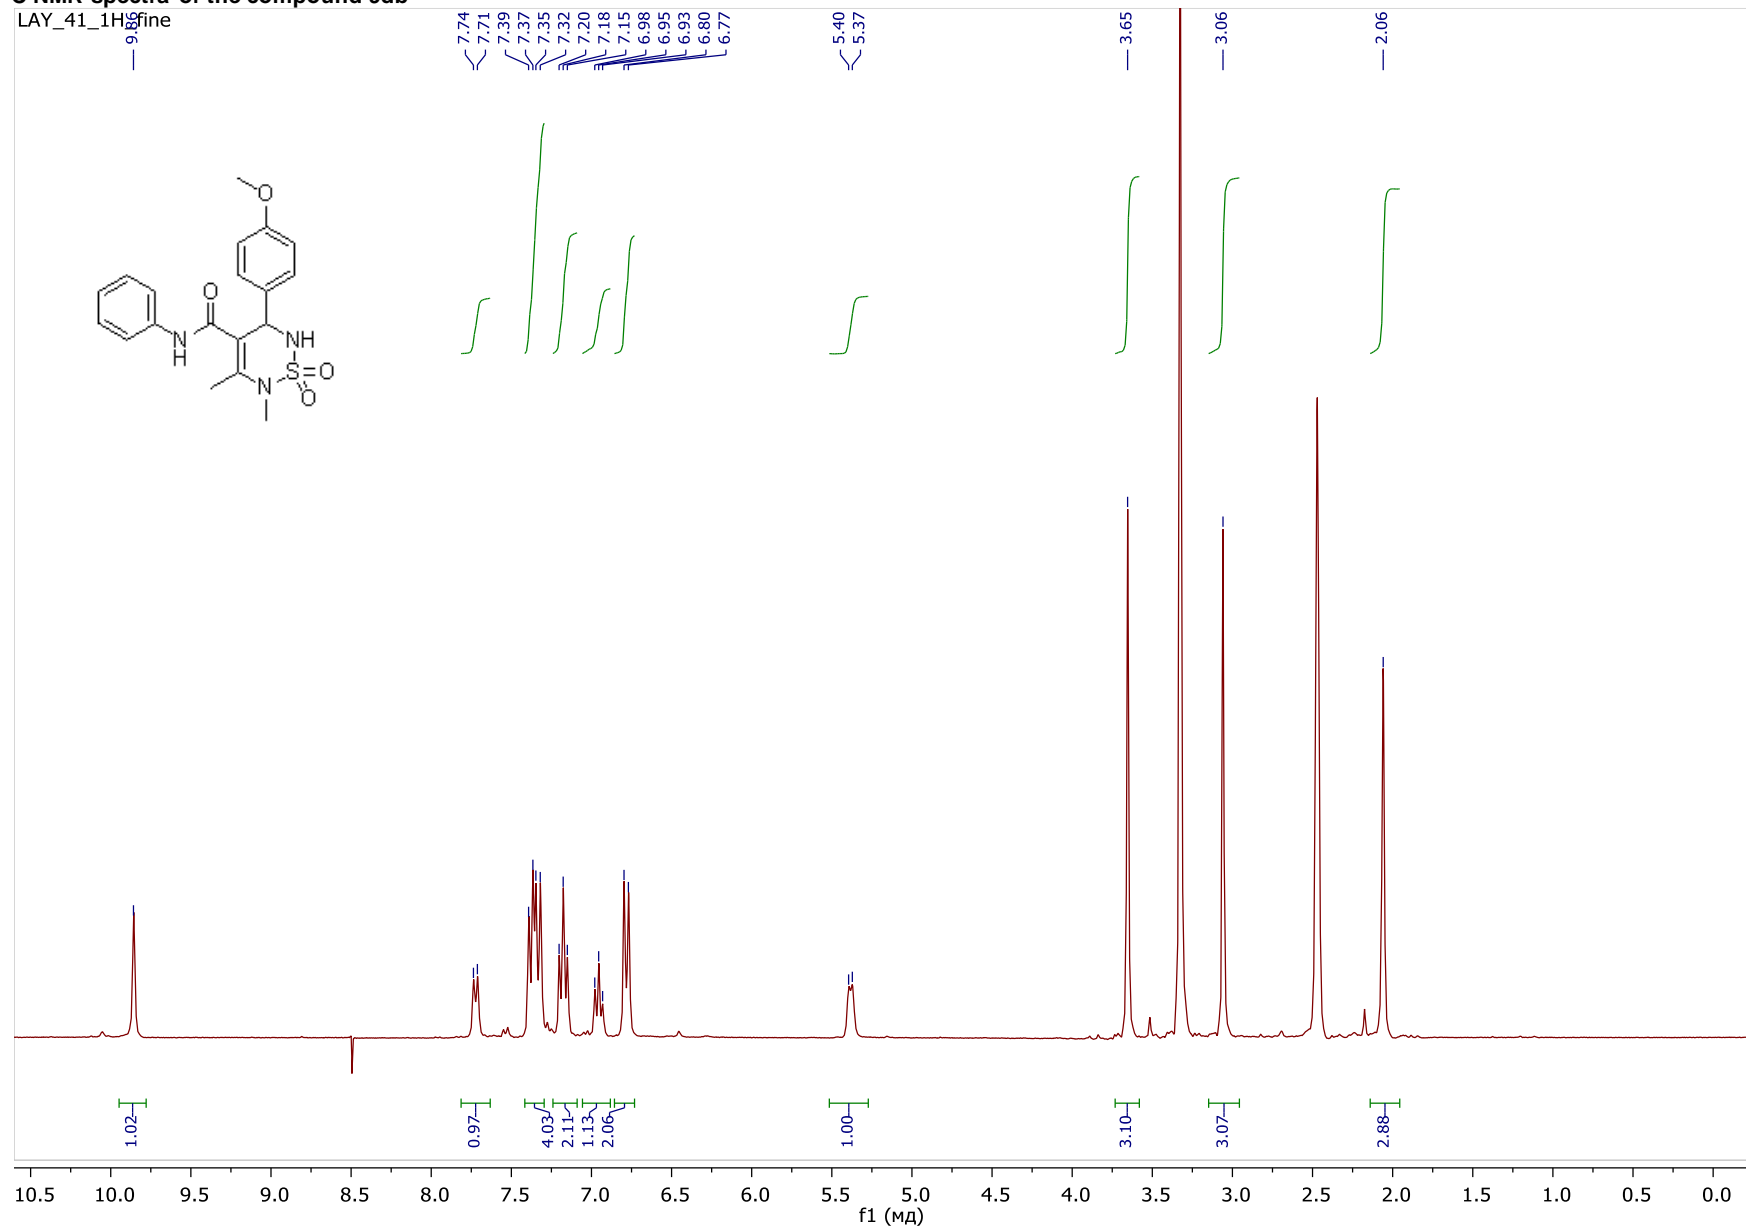

# SUPPORTING INFORMATION

LAY\_41\_13C  
13C

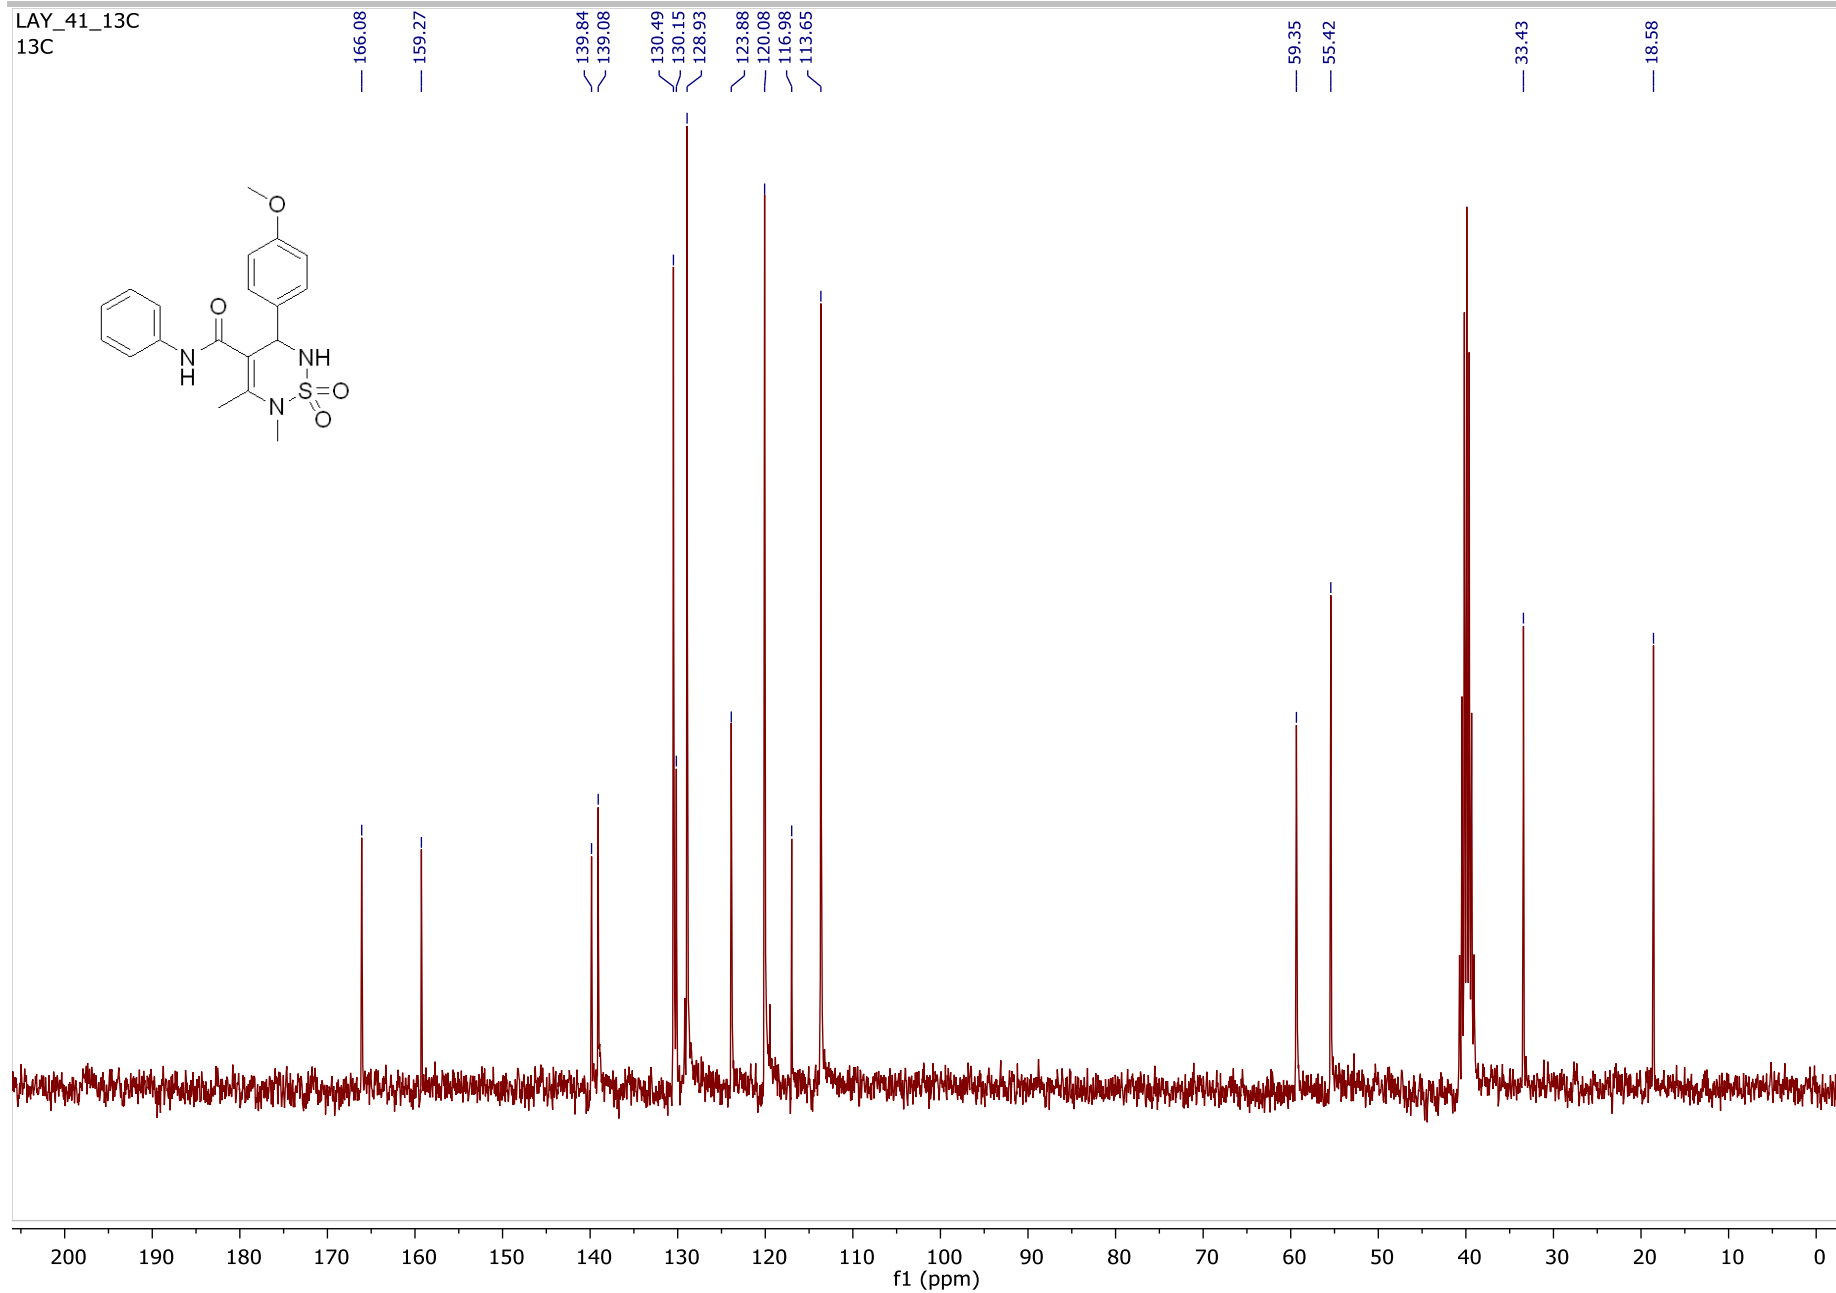

# SUPPORTING INFORMATION

## <sup>1</sup>H and <sup>13</sup>C NMR spectra of the compound 9de

VAN-LAY494.1.fid

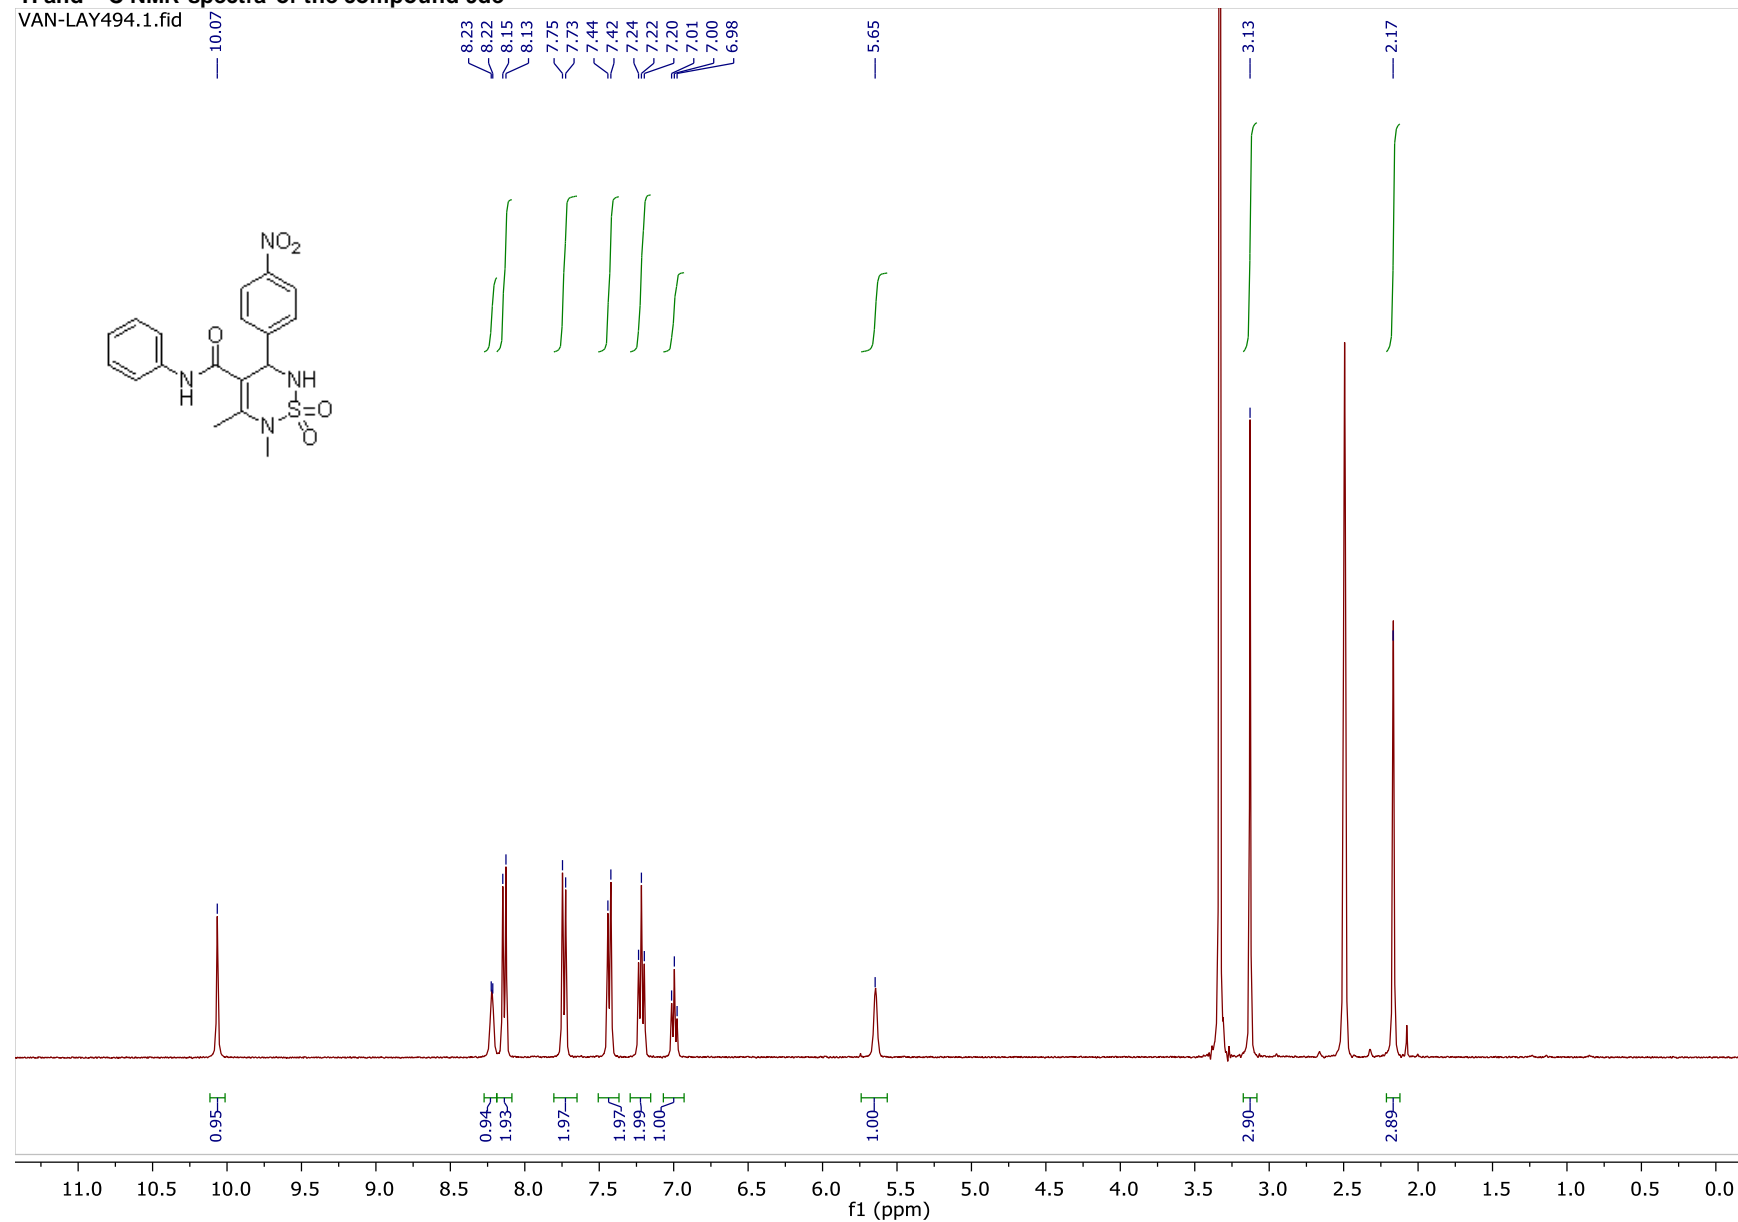



# SUPPORTING INFORMATION

LAY049\_13C  
13C

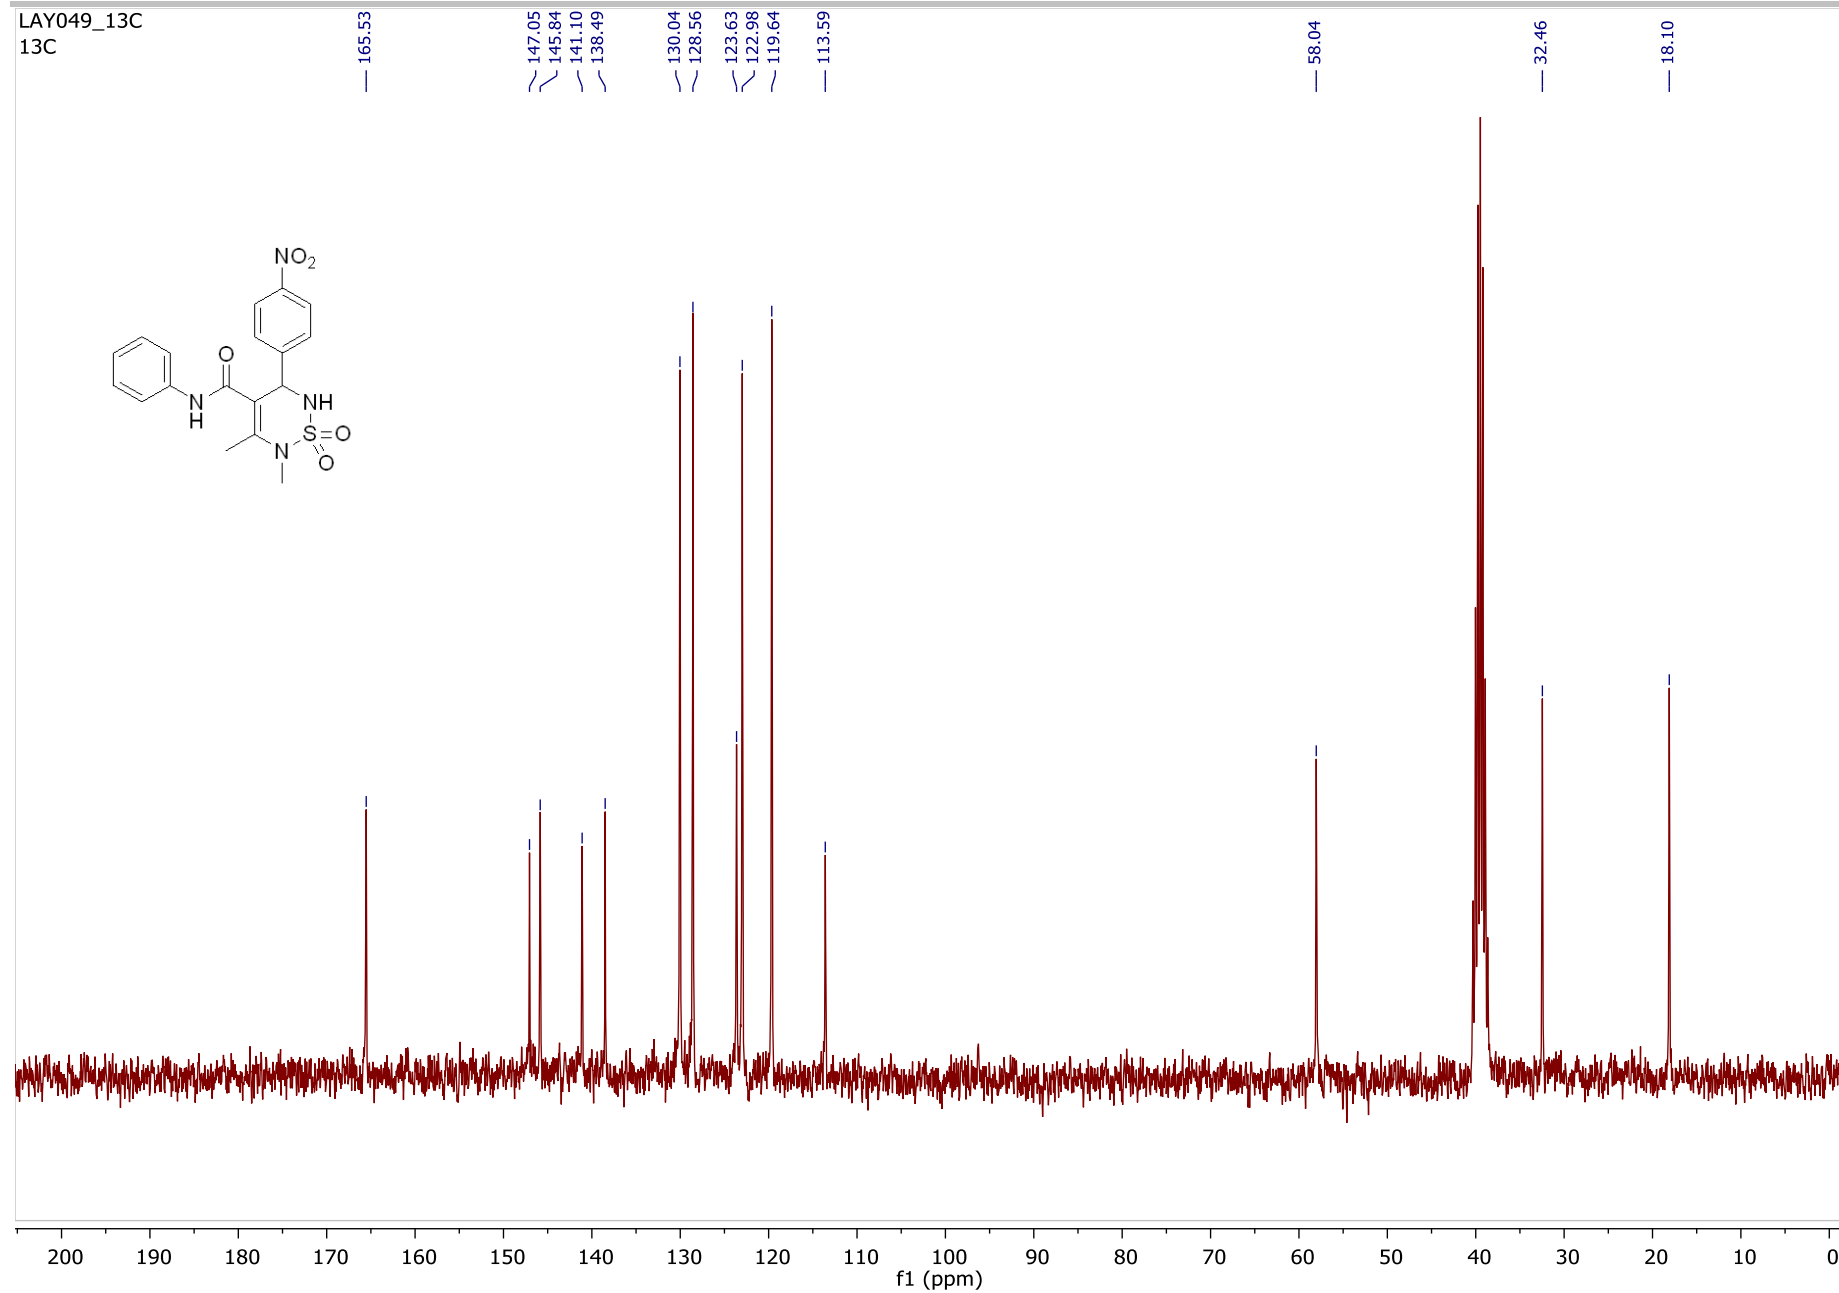

# SUPPORTING INFORMATION

## <sup>1</sup>H NMR and <sup>13</sup>C spectrum of the compound 10cb

van-lay402.1.fid

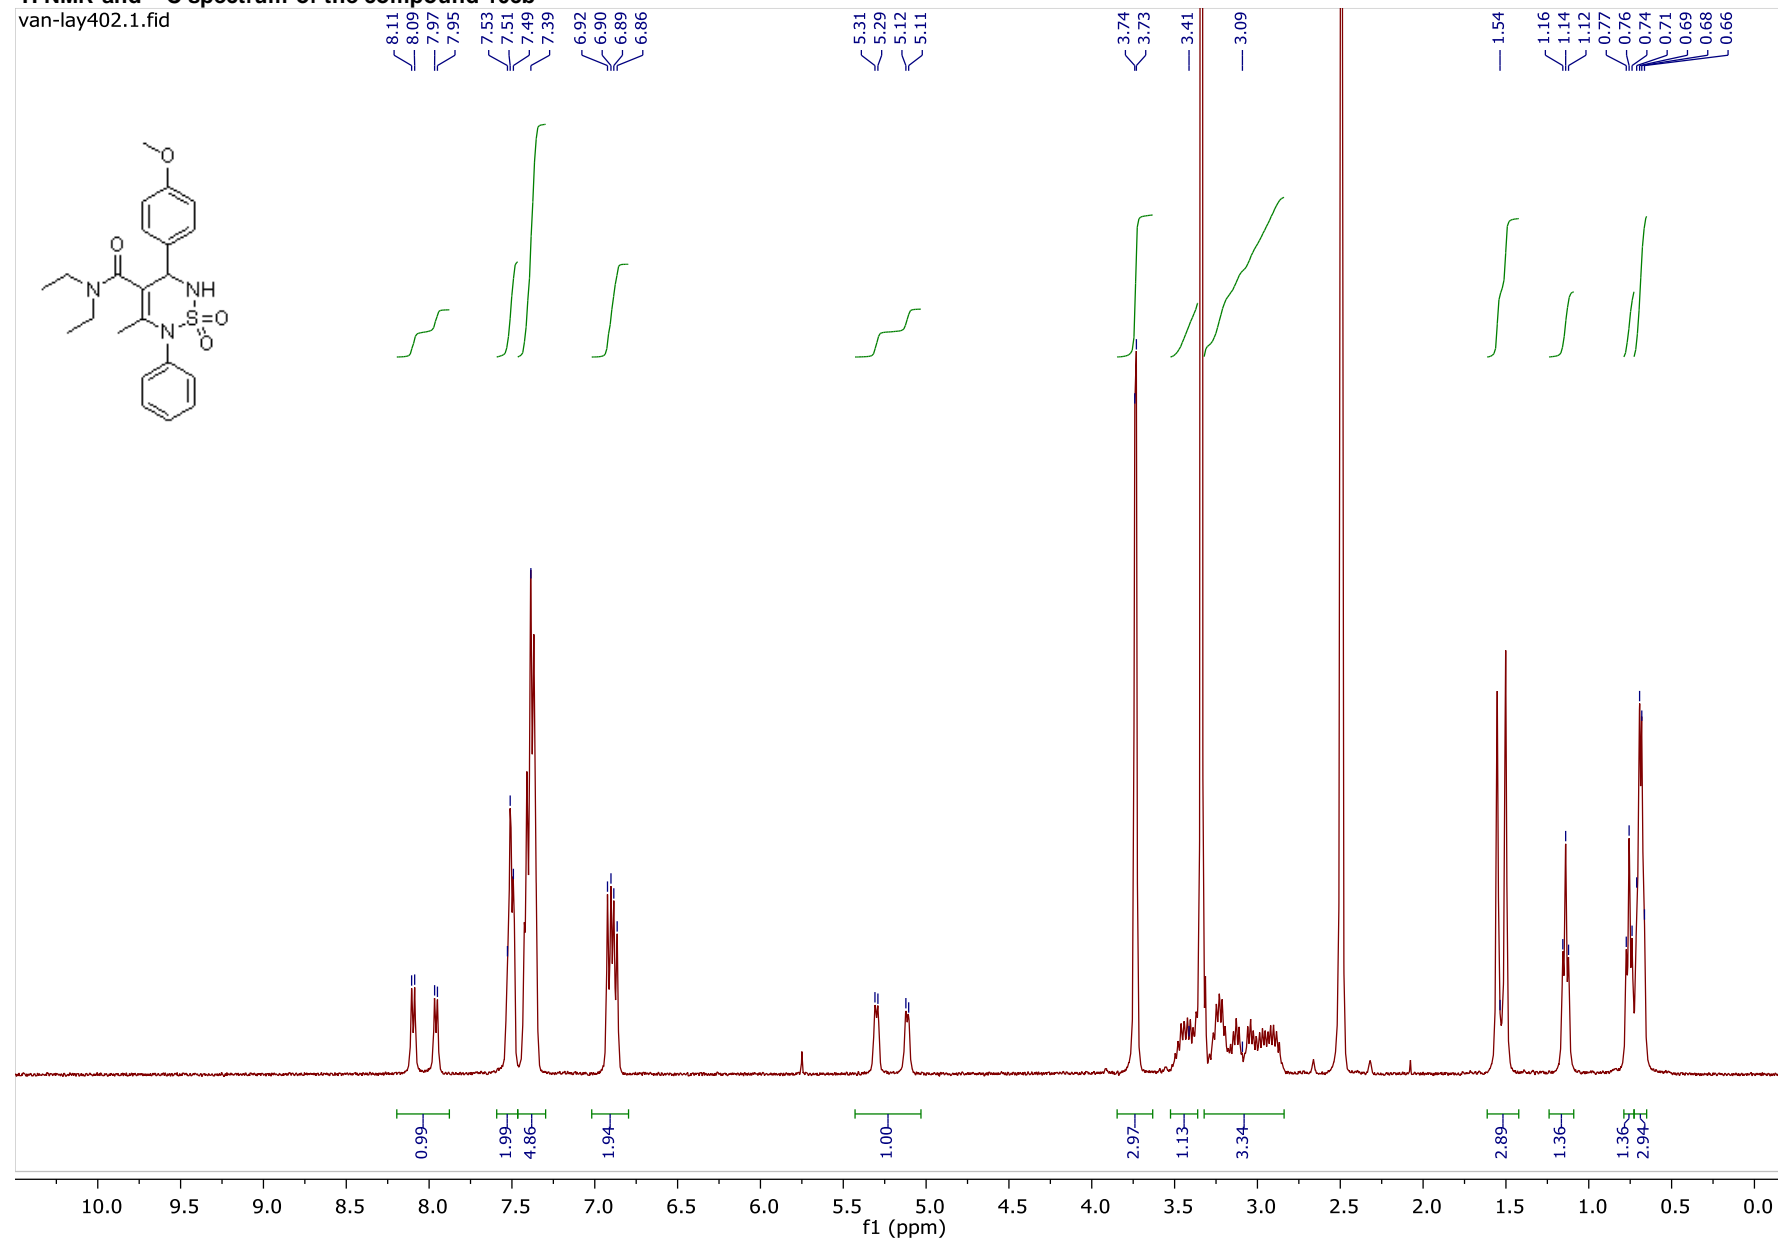

# SUPPORTING INFORMATION

Lay-40\_C13.1.f13

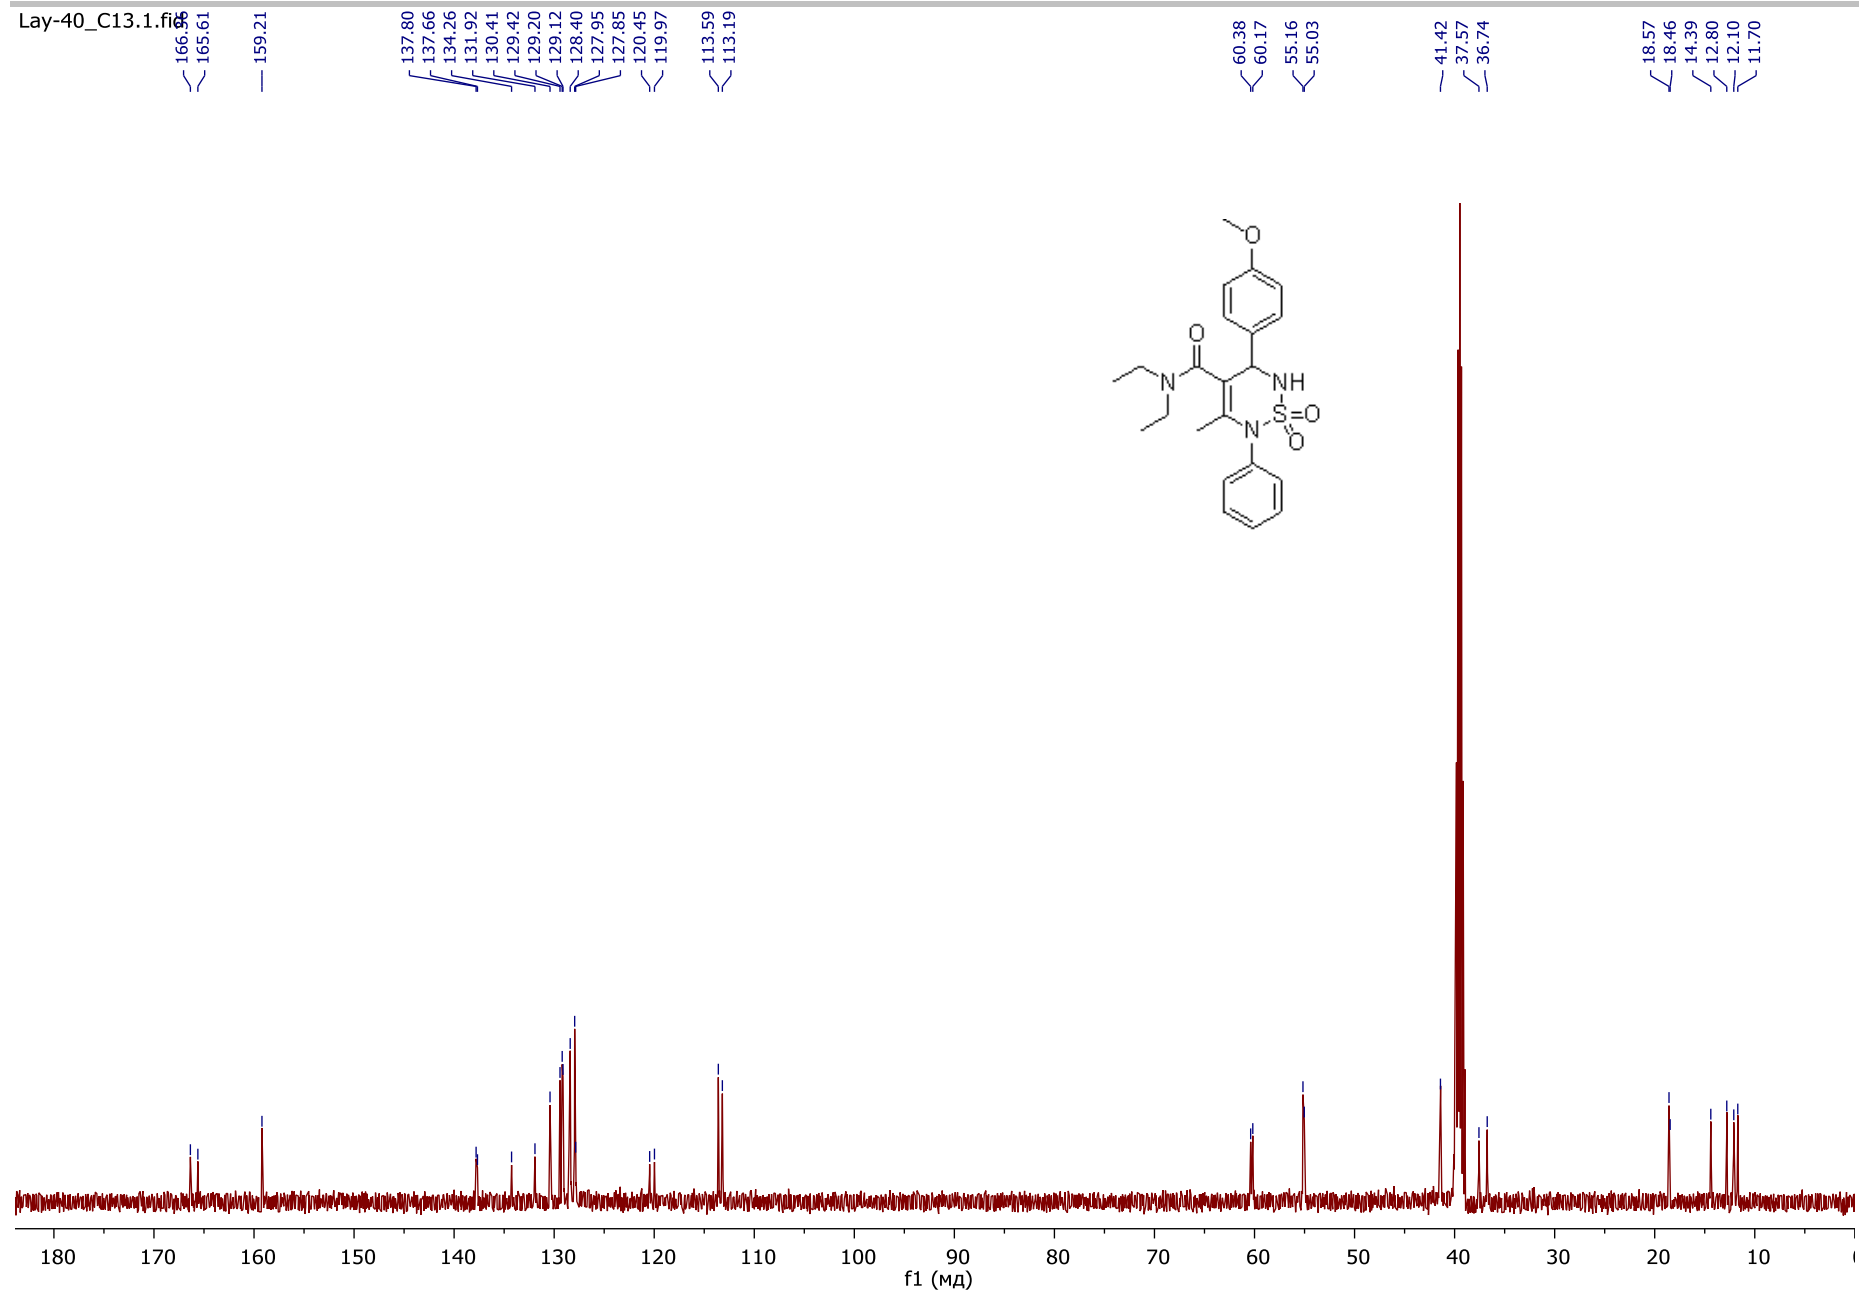

# SUPPORTING INFORMATION

## <sup>1</sup>H NMR and <sup>13</sup>C spectrum of the compound 11dd

van-lay473.1.fid

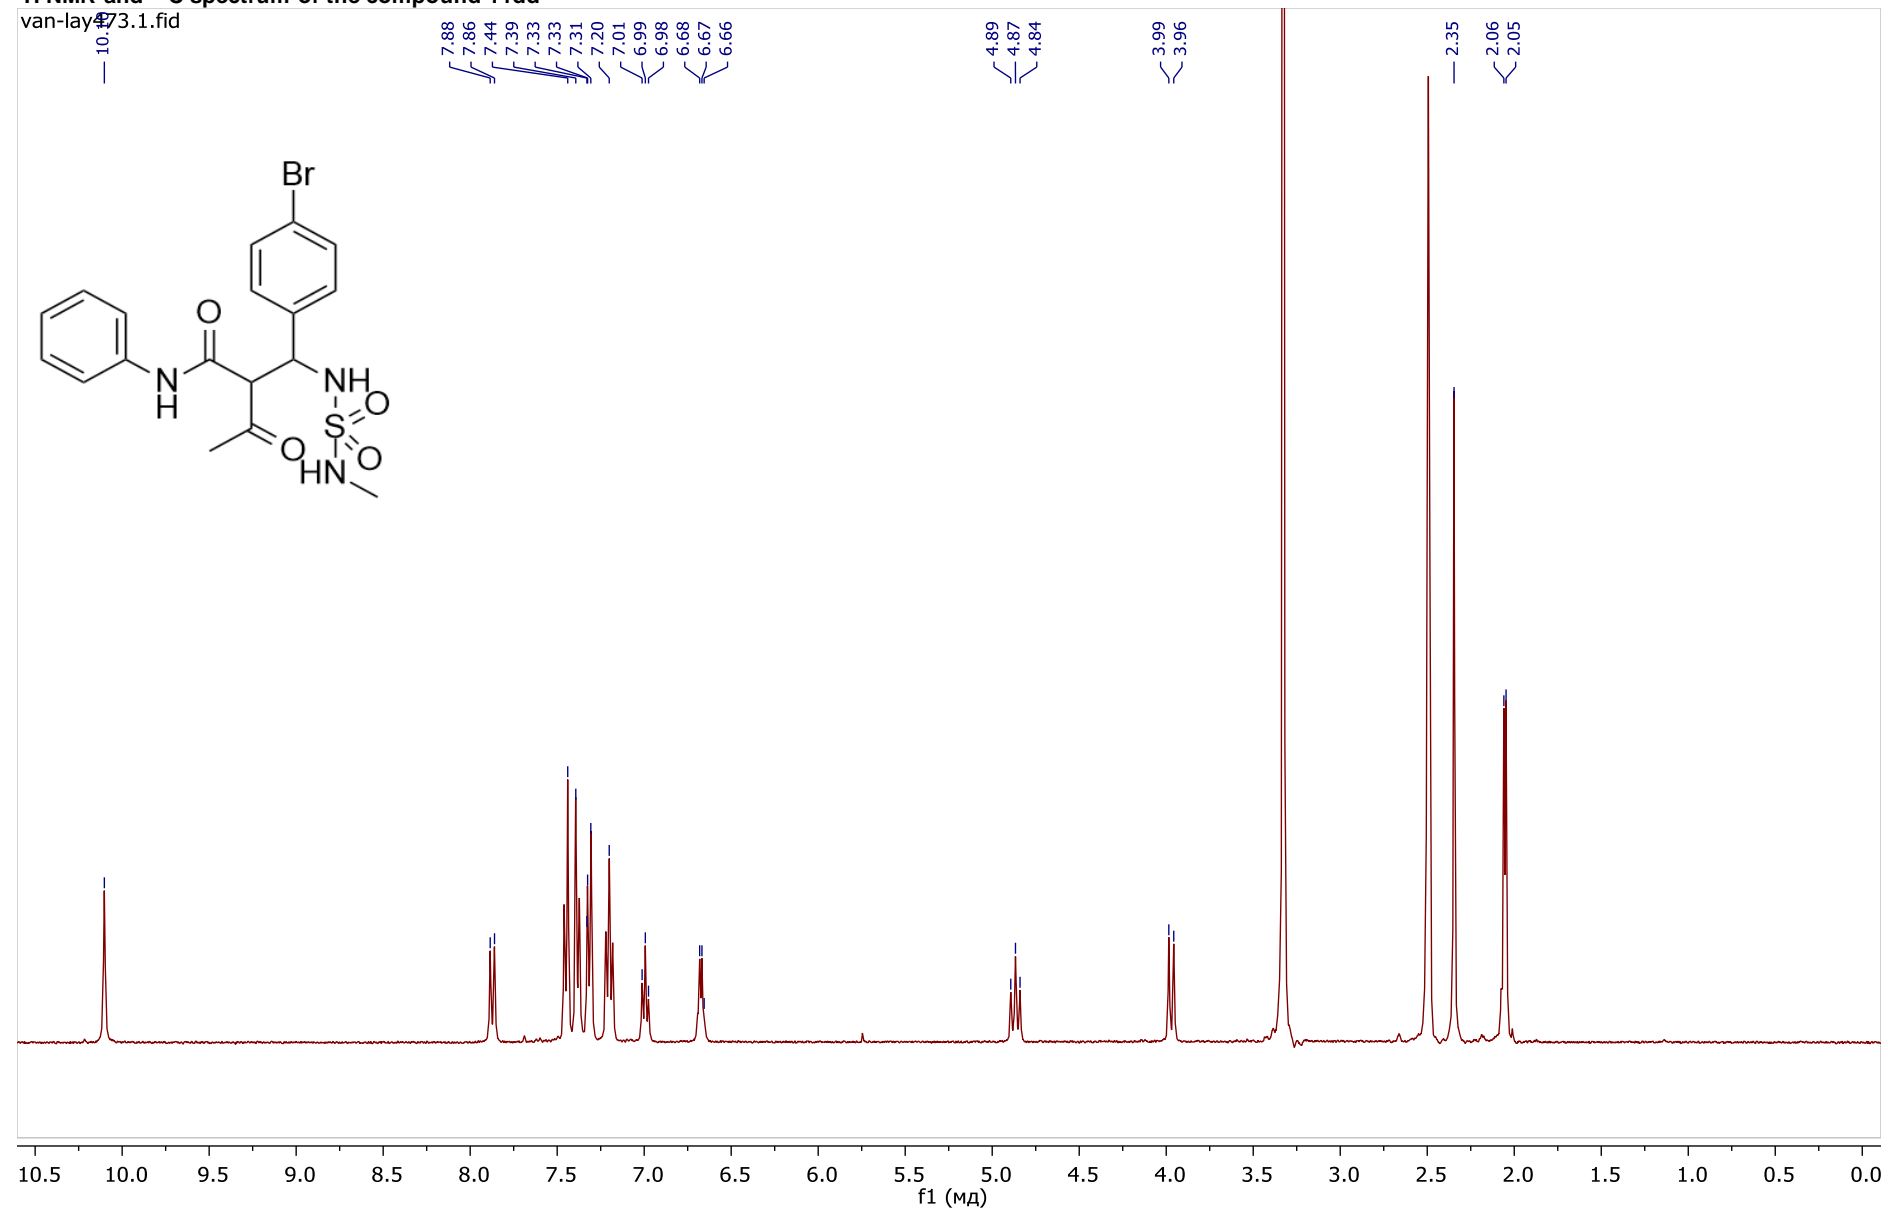

# SUPPORTING INFORMATION

BA078264-139-C13.1.fid

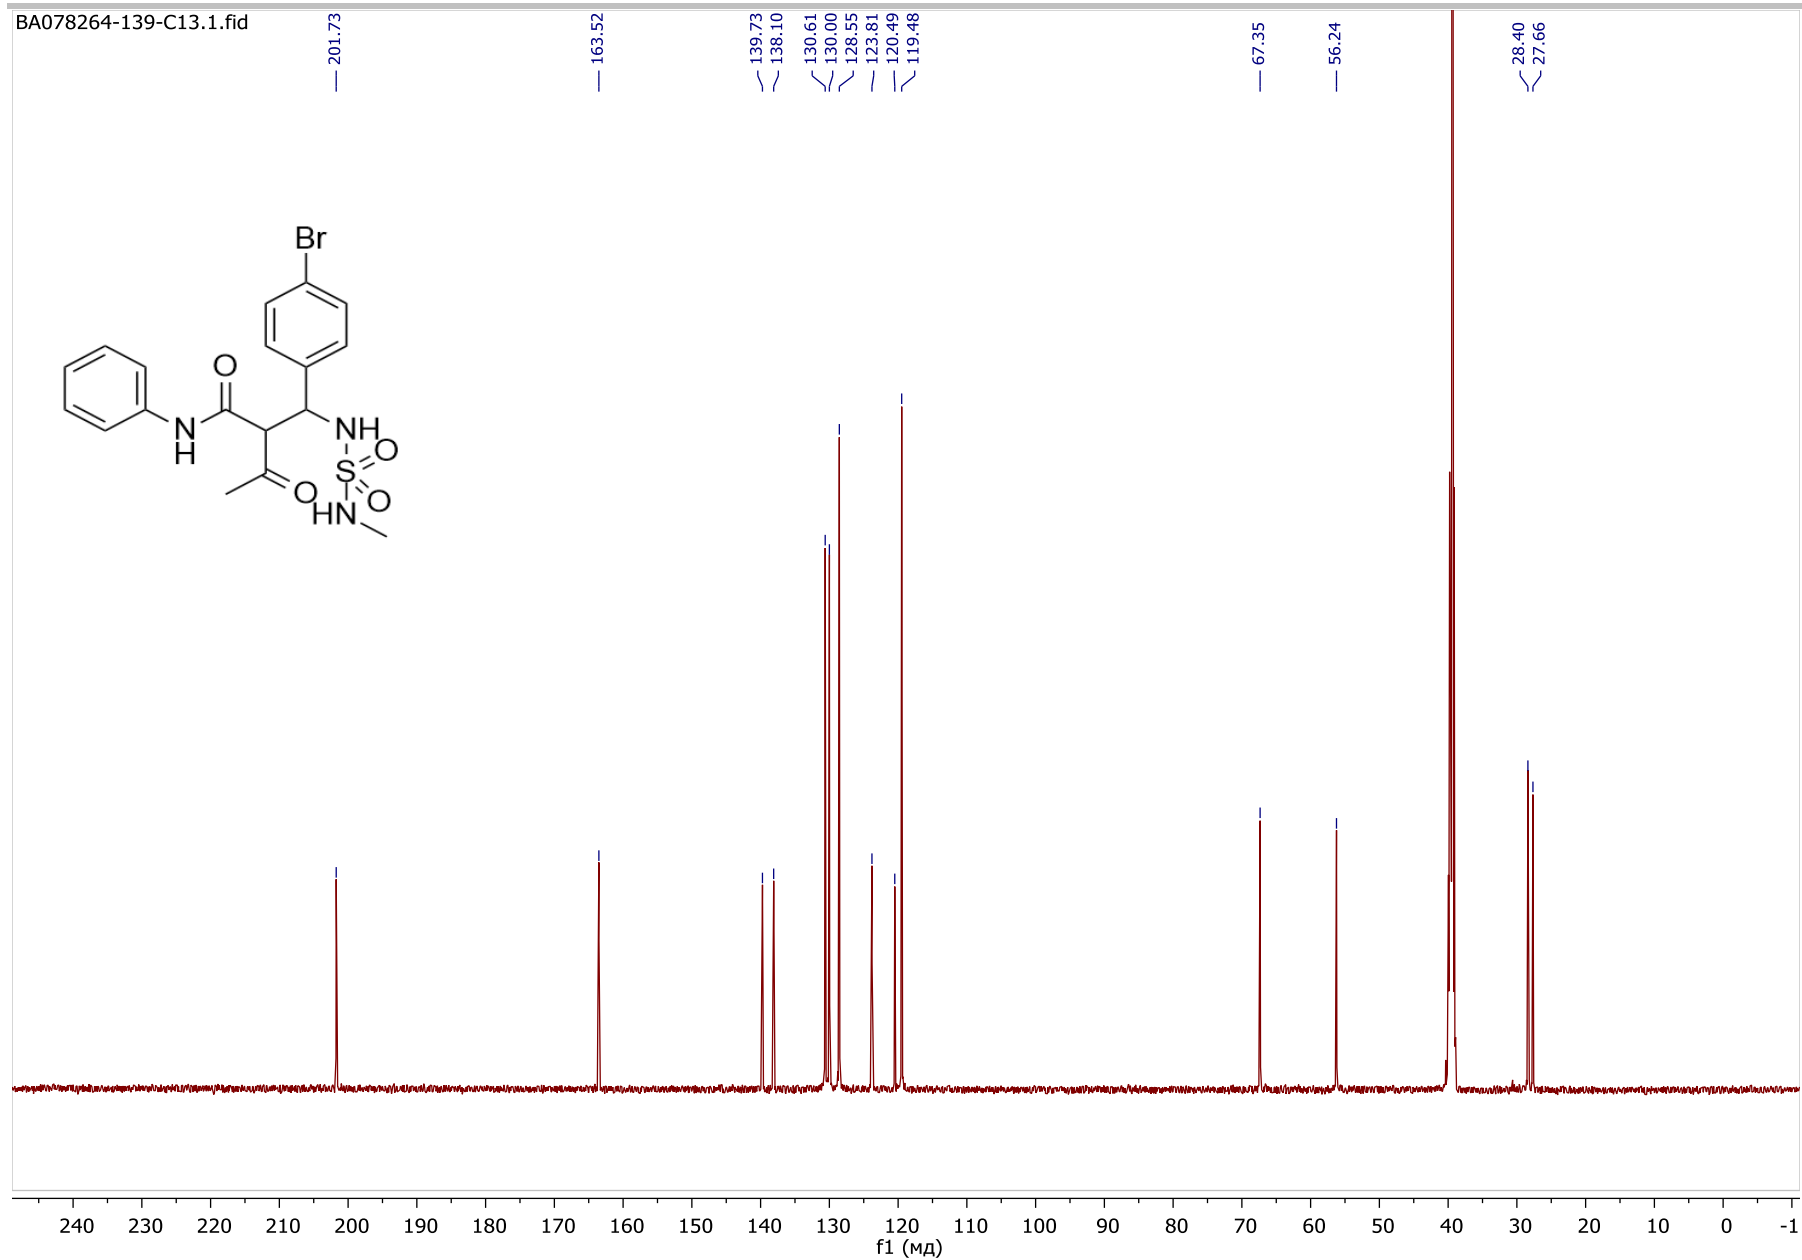

# SUPPORTING INFORMATION

## <sup>1</sup>H and <sup>13</sup>C NMR spectra of the compound 12b

lay-002.1.fid

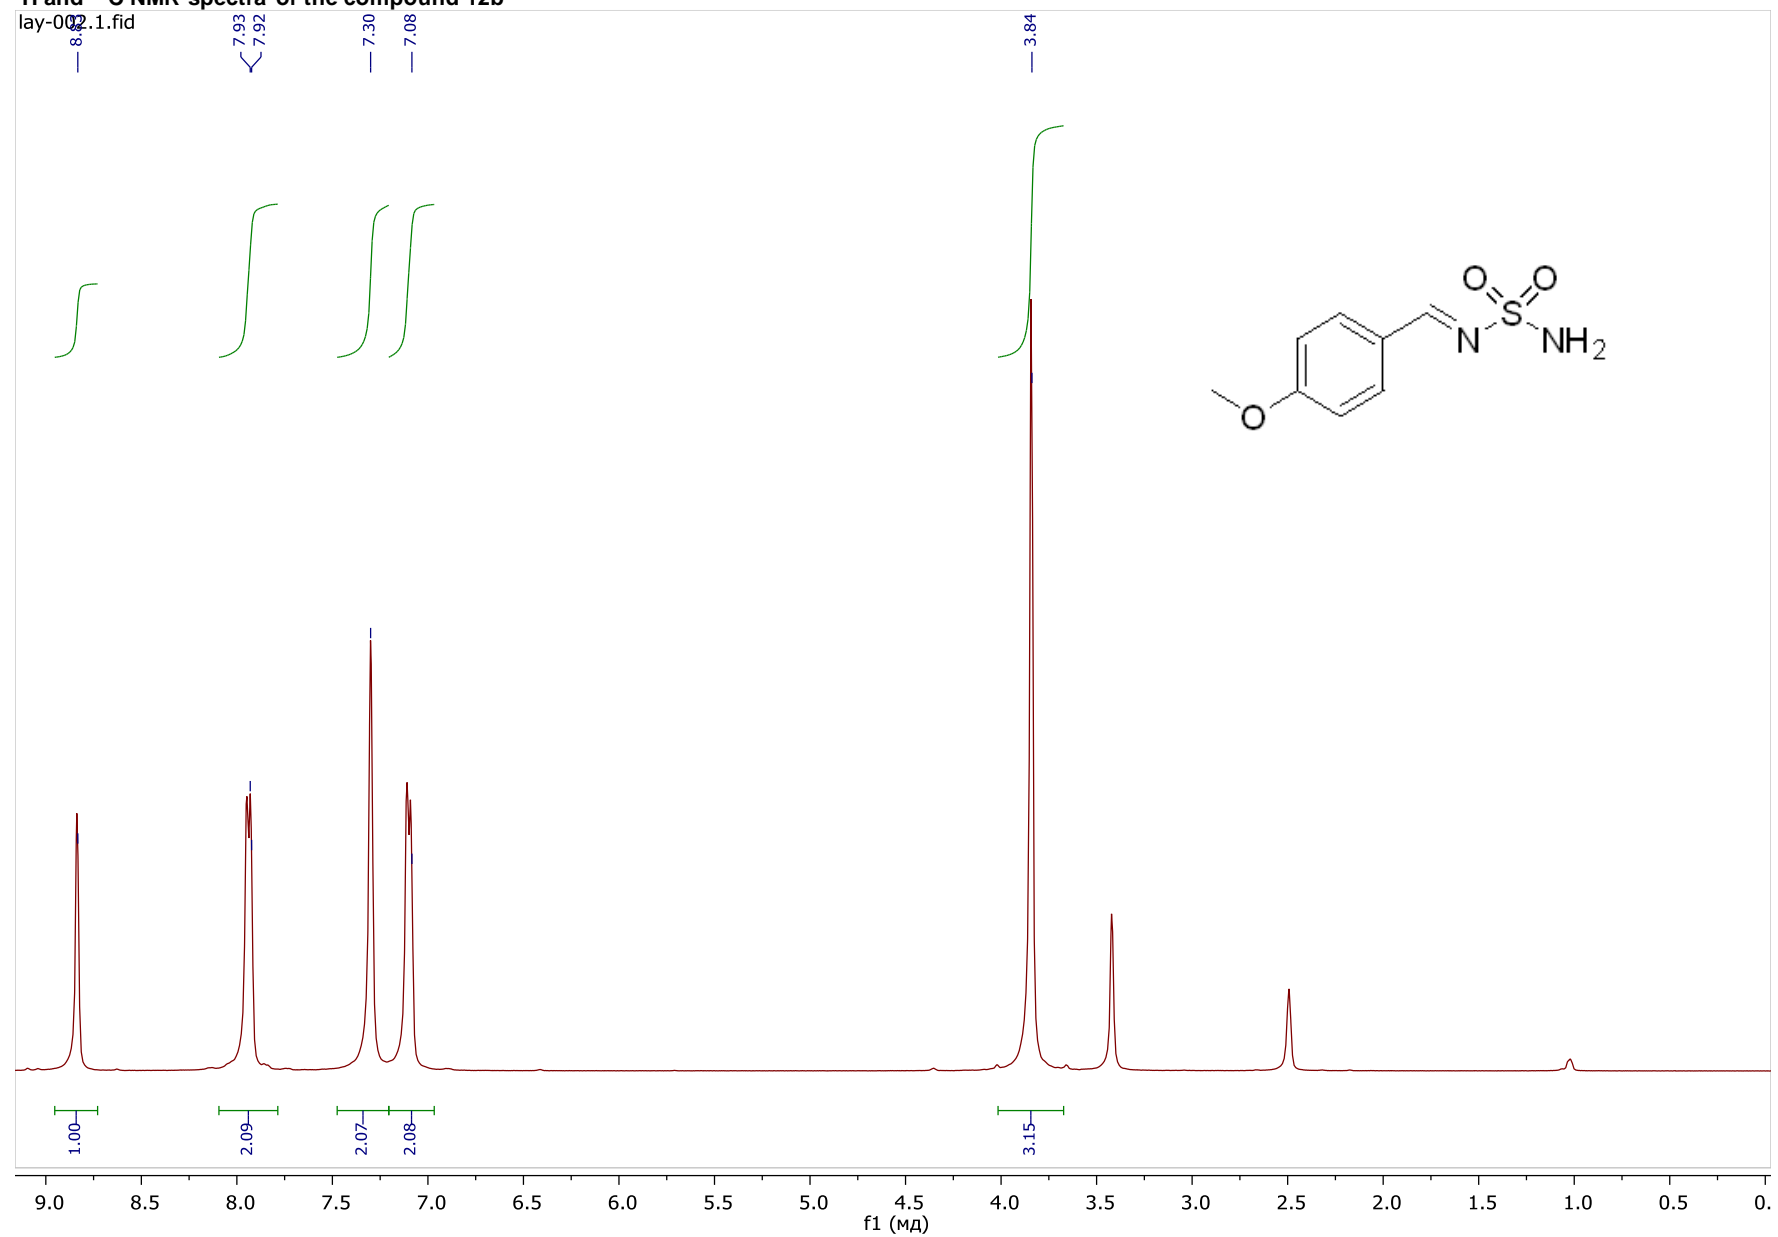

# SUPPORTING INFORMATION

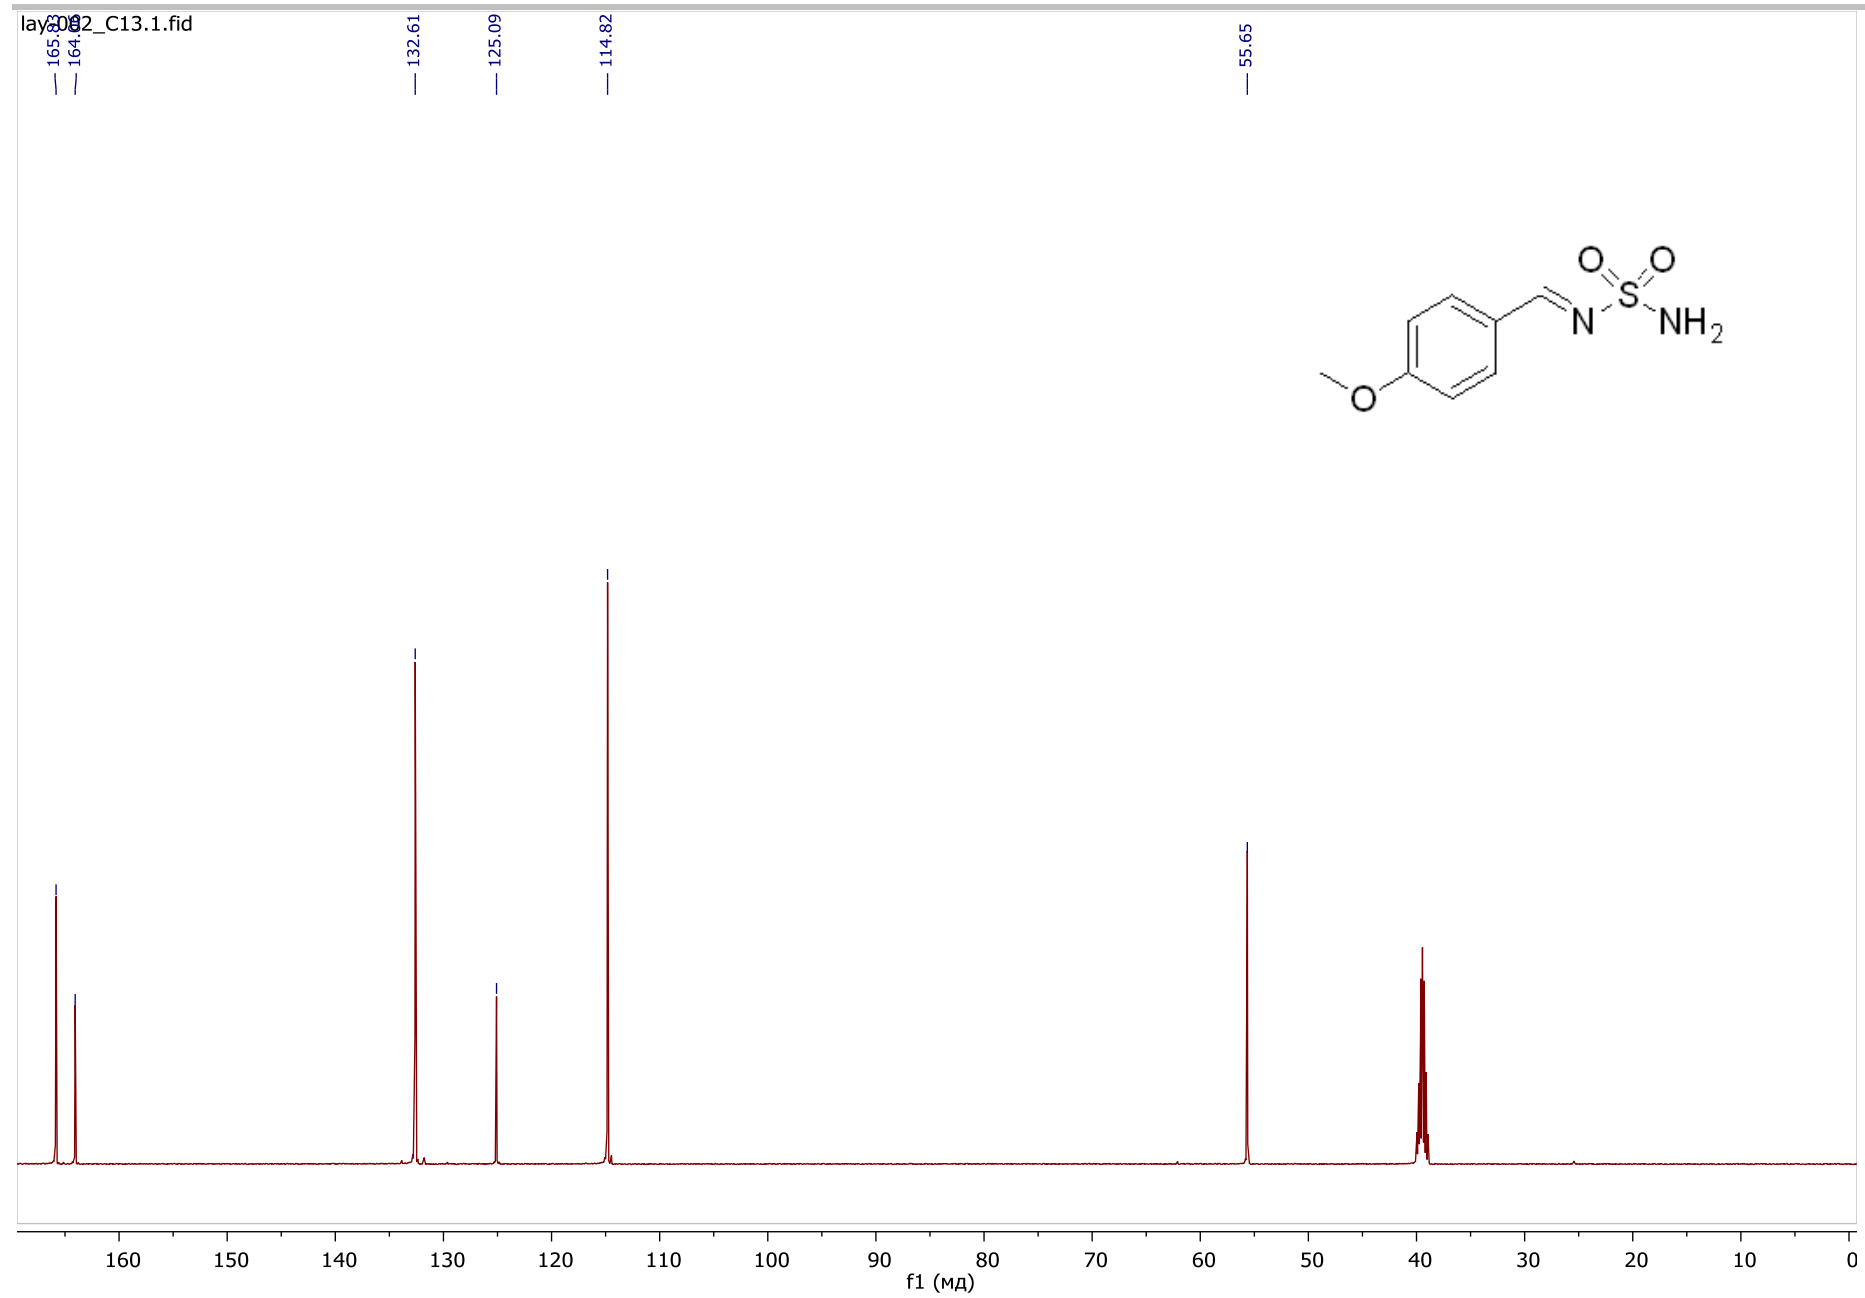

# SUPPORTING INFORMATION

## <sup>1</sup>H and <sup>13</sup>C NMR spectra of the compound 12d

van-lay-0042

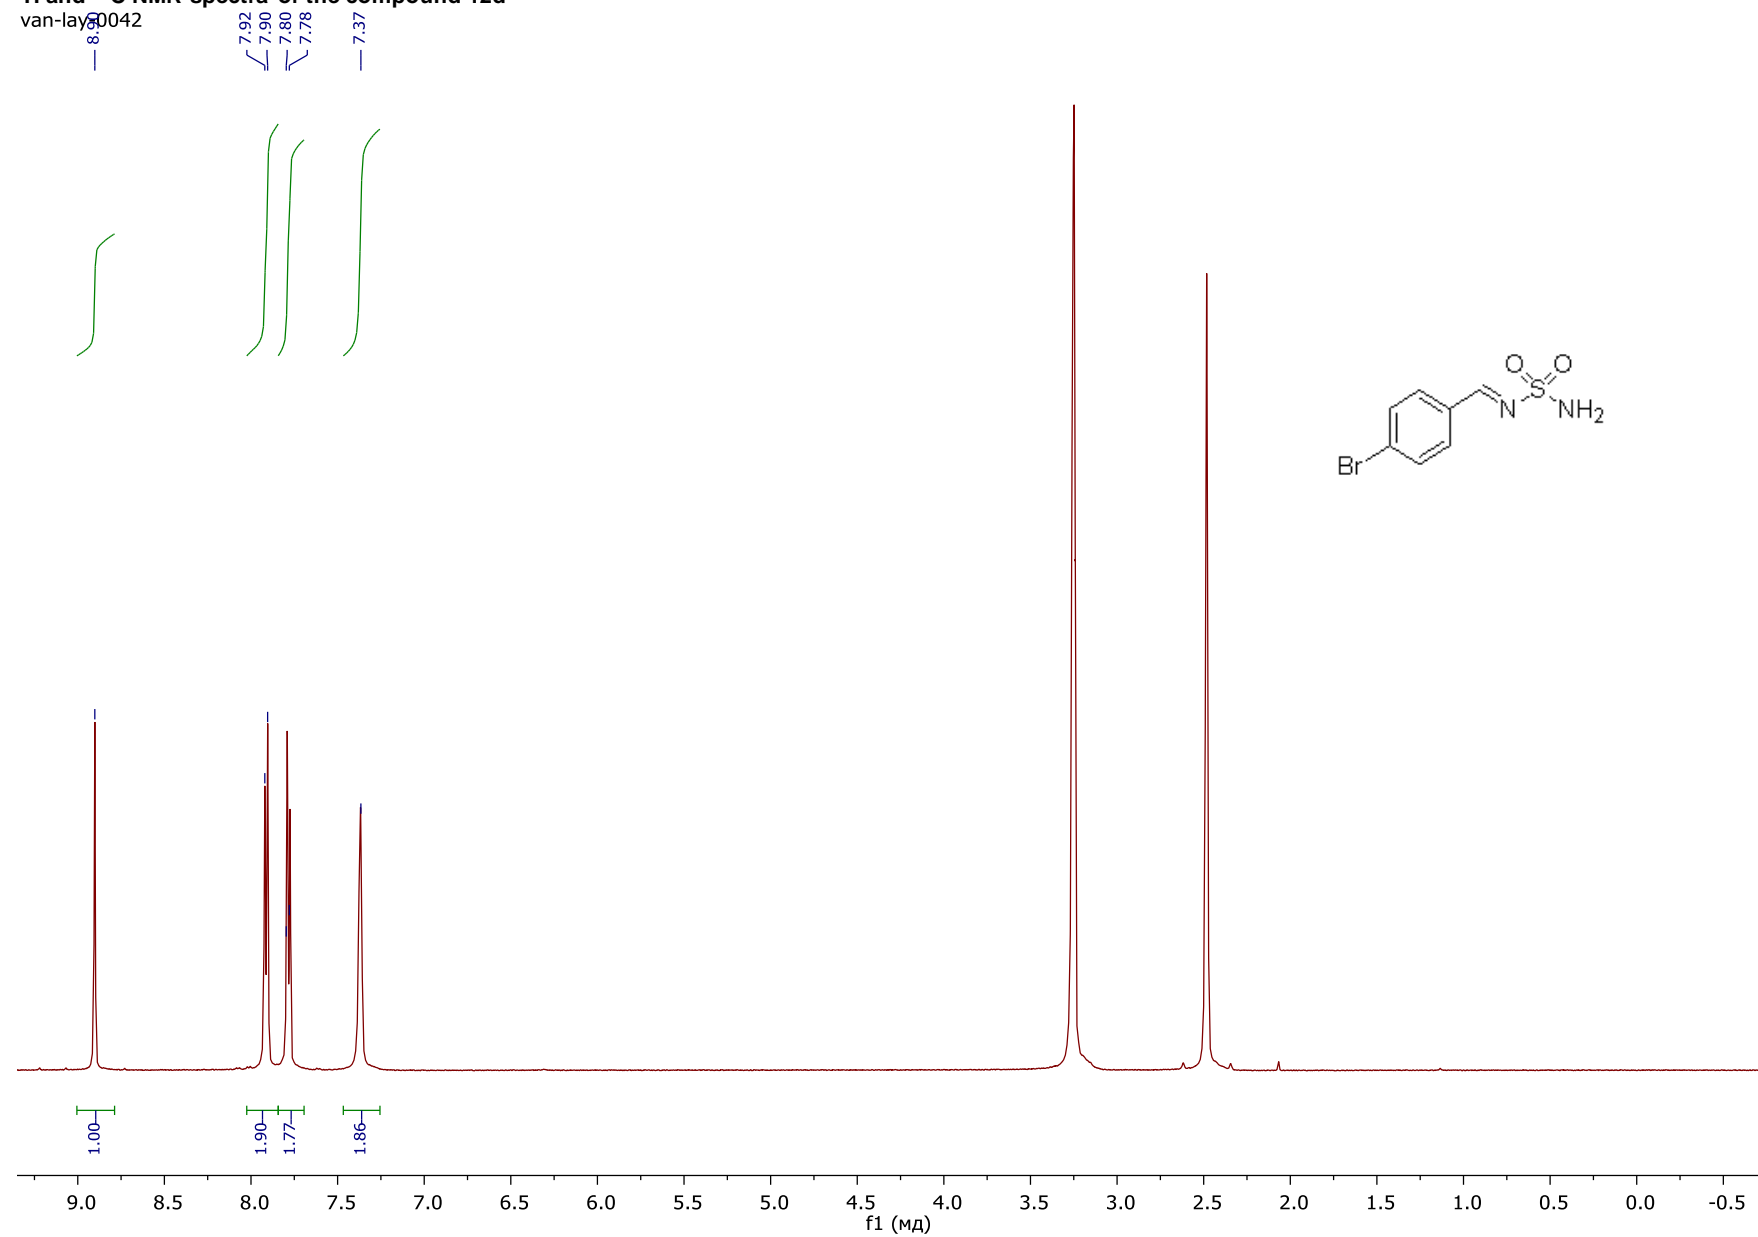



# SUPPORTING INFORMATION

LAY004\_T\_C13.1.fid

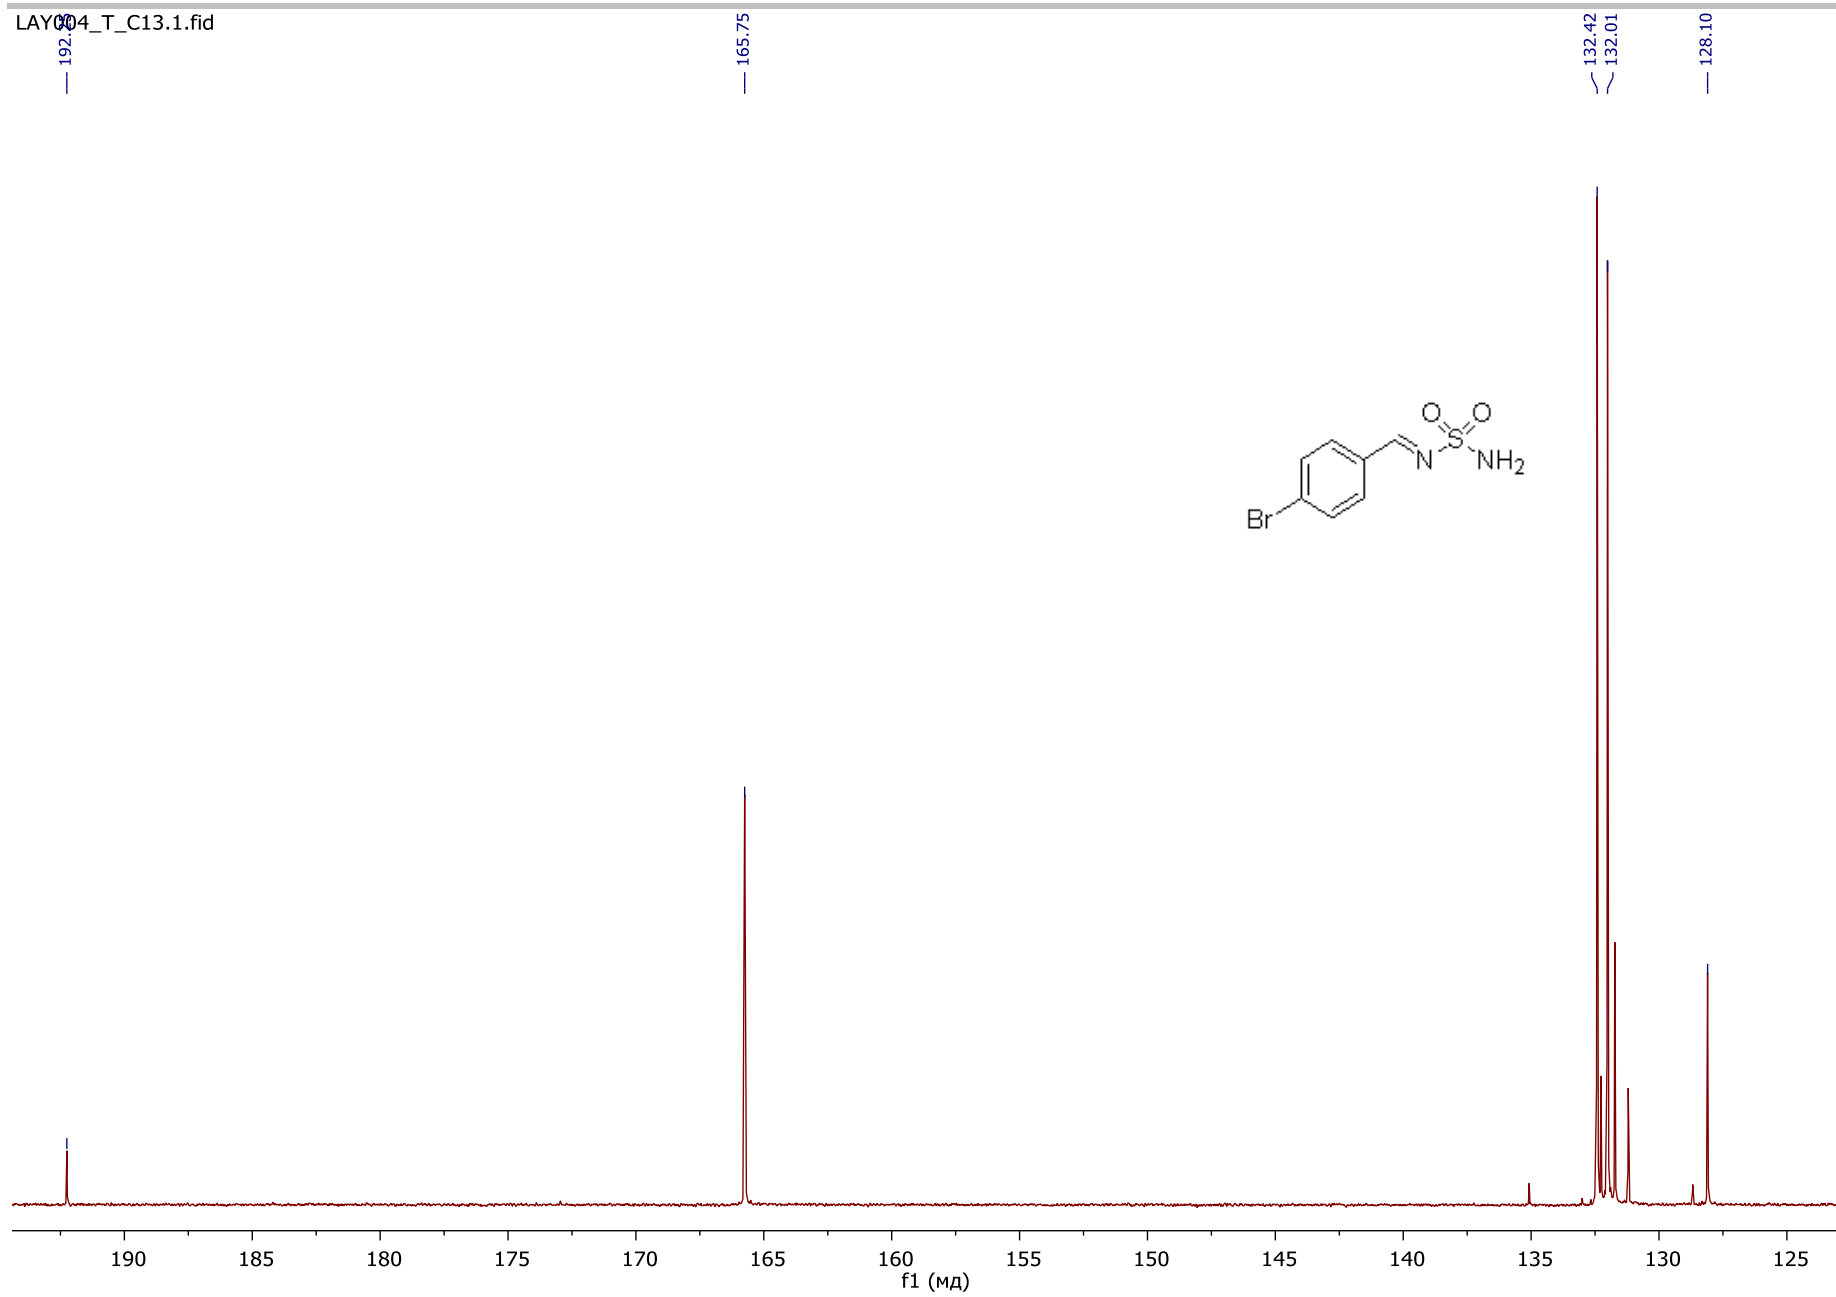

# SUPPORTING INFORMATION

## <sup>1</sup>H and <sup>13</sup>C NMR spectra of the compound 14b

Lay\_010\_H-3.fid

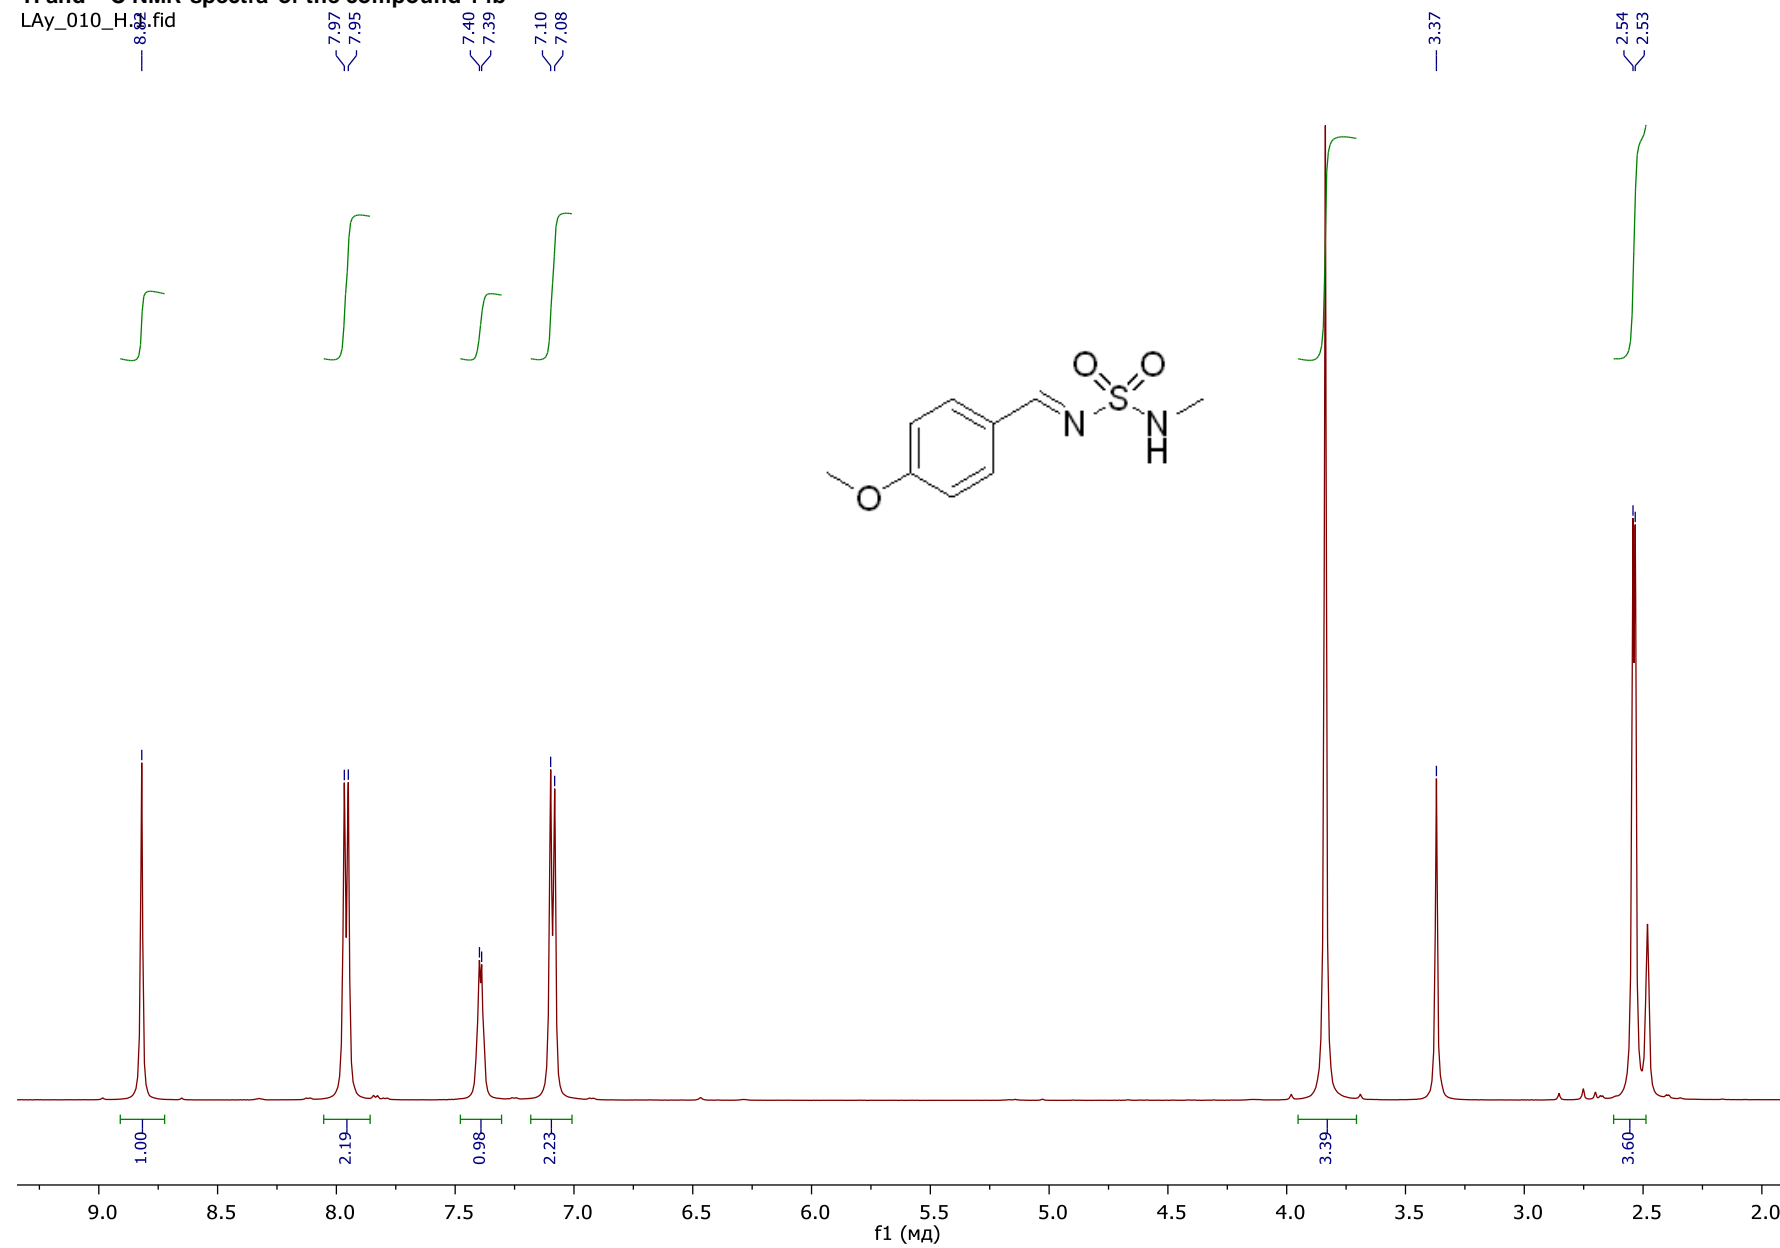

# SUPPORTING INFORMATION

lay810\_C13.1.fid

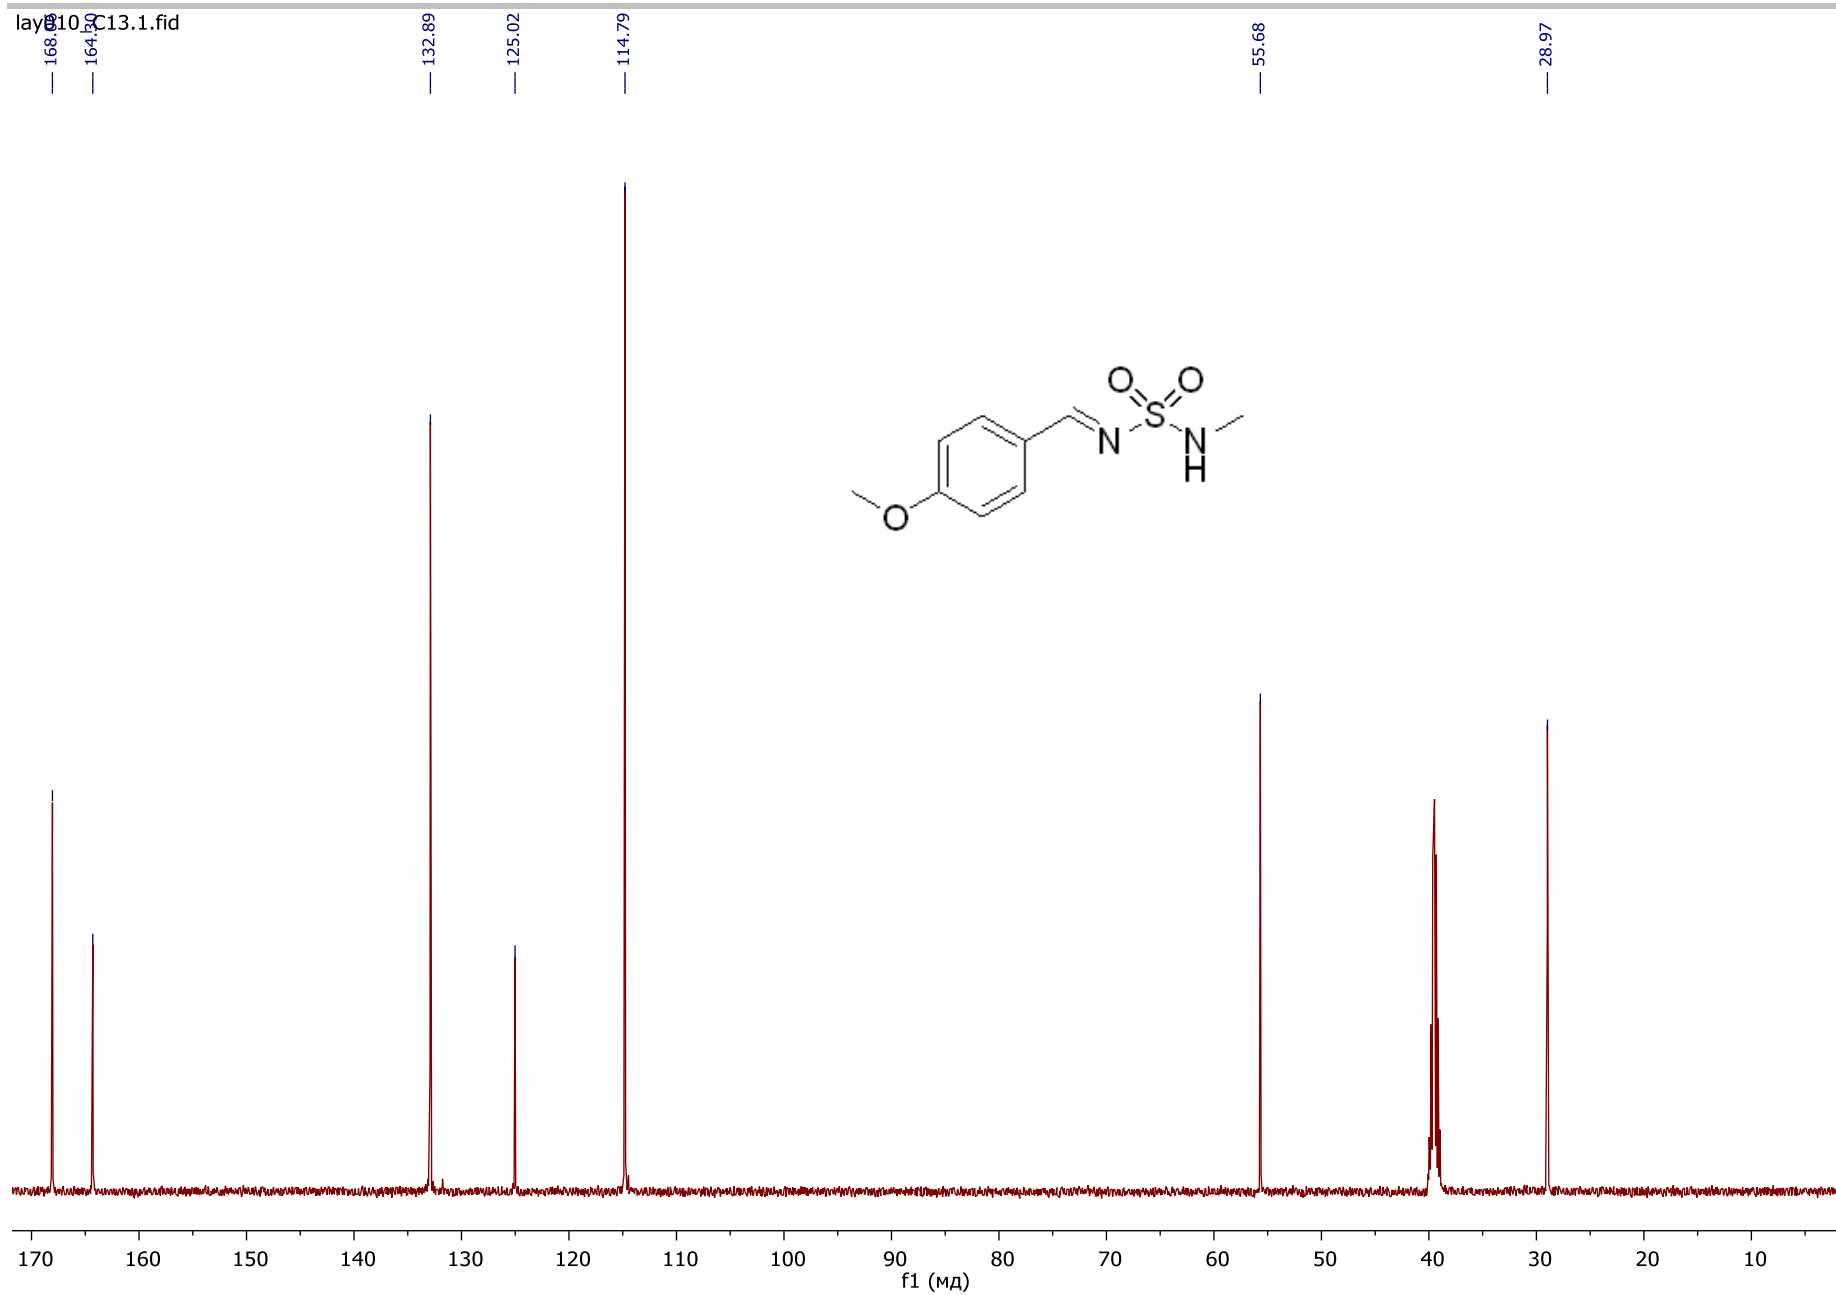

# SUPPORTING INFORMATION

## <sup>1</sup>H and <sup>13</sup>C NMR spectrum of the compound 15e

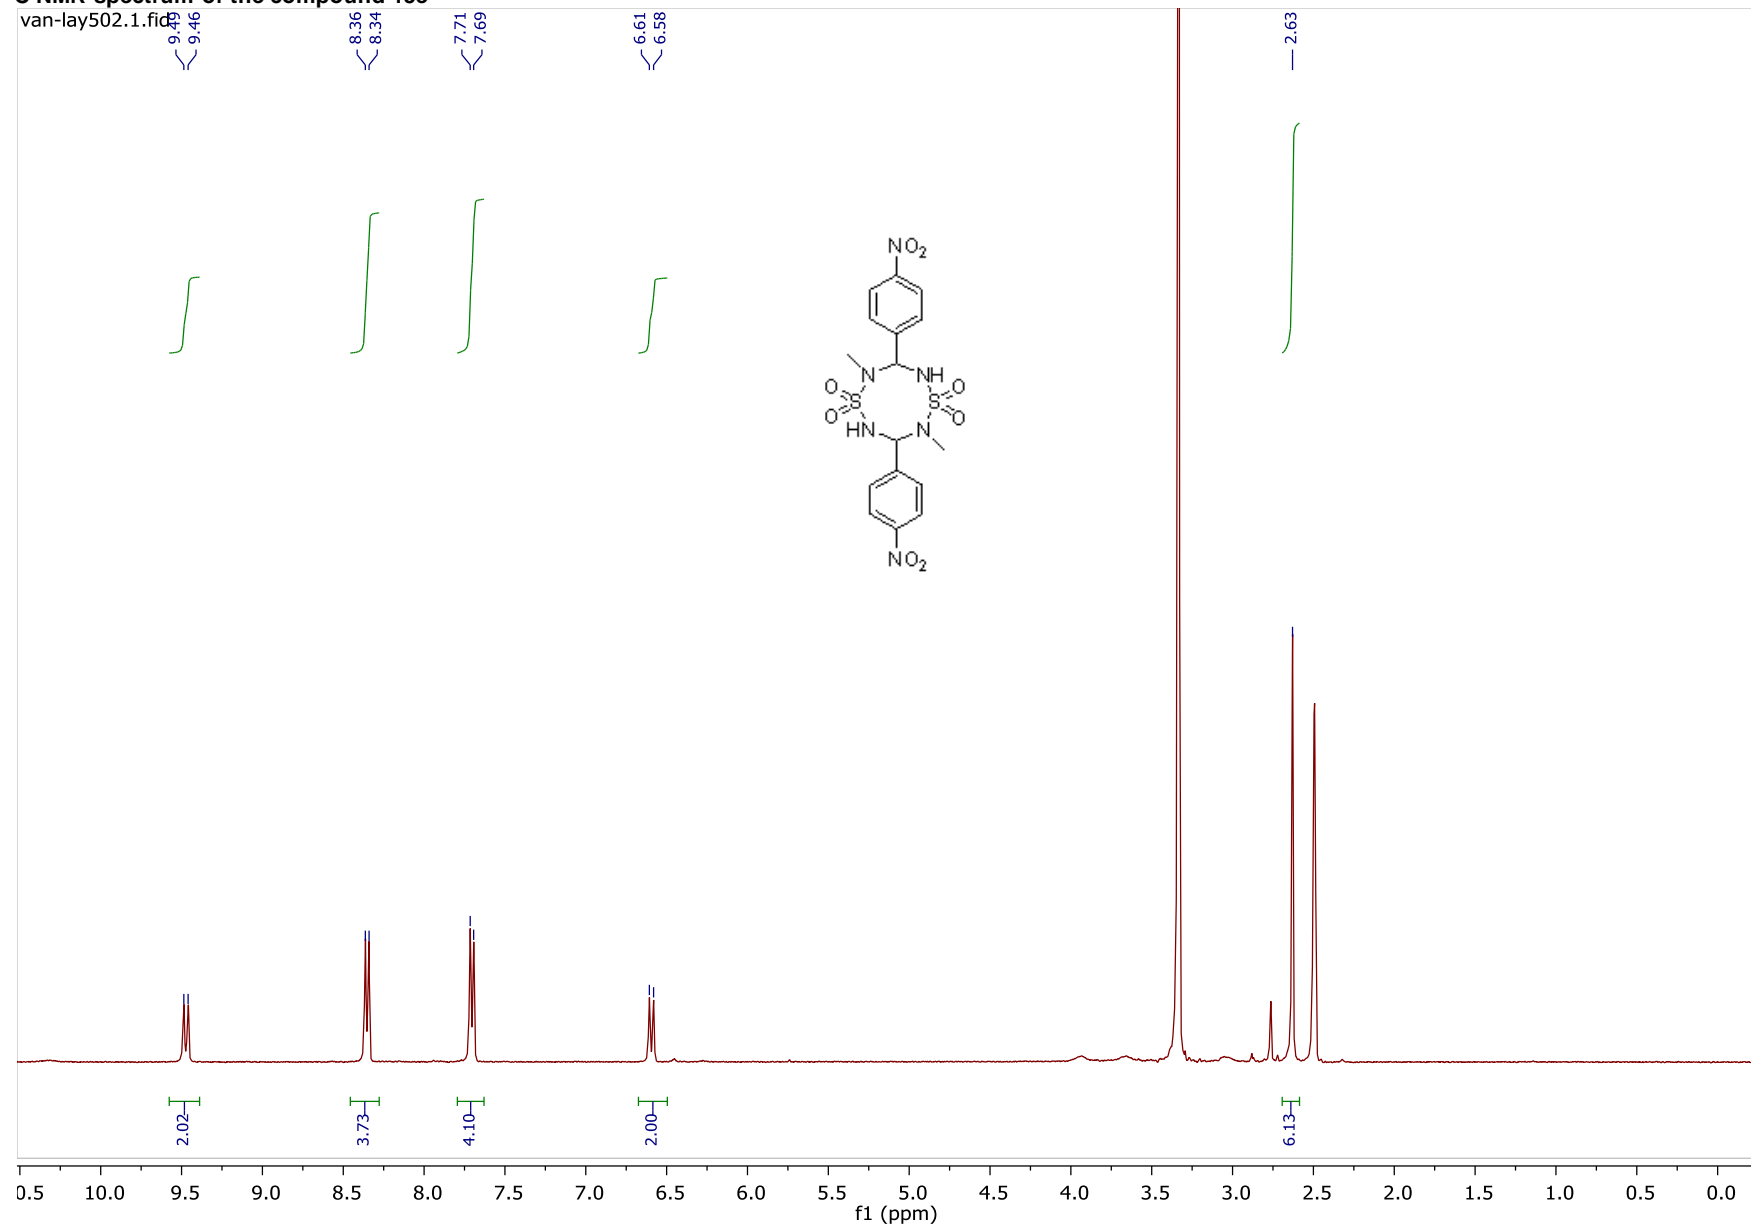

# SUPPORTING INFORMATION

Lay-50\_C13.1.fid

— 131.55  
— 127.95  
— 123.97

— 63.25

— 52.33

— 28.65

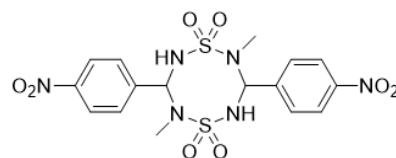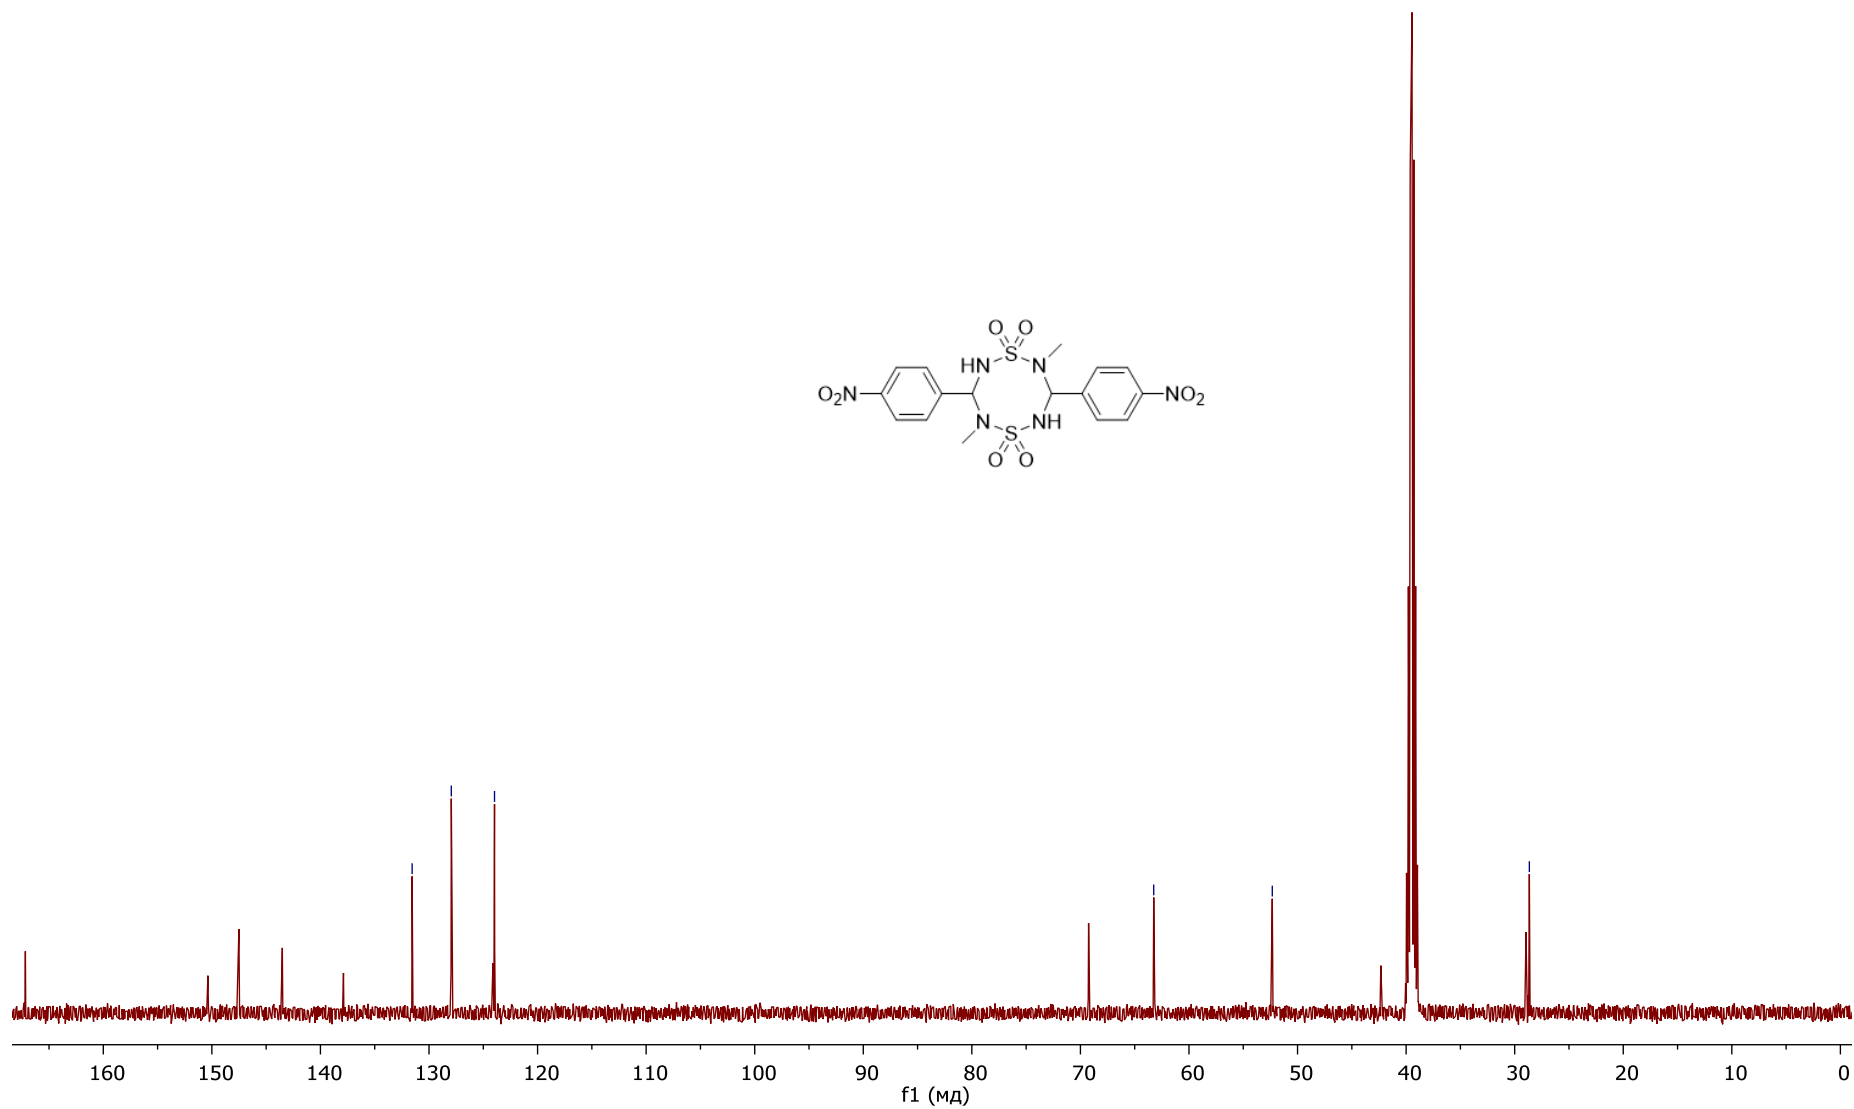

Supplement: d3qo01926h1.pdf [file d3qo01926h1.pdf]
